# Supplementary material for: Quantitative Proteome Profiling of a S-Nitrosoglutathione Reductase (GSNOR) Null Mutant Reveals a New Class of Enzymes Involved in Nitric Oxide Homeostasis in Plants
Source: Front Plant Sci. 2021 Dec 7;12:787435. doi: 10.3389/fpls.2021.787435 (PMC8695856; doi:10.3389/fpls.2021.787435)
Supplement: Supplementary file 8 [file Data_Sheet_1.XLSX]

## Sheet: Heat map sign proteins
Ensembl gene	Protein IDs	Protein names	Gene names	Uniprot name	Gene name	GOBP name	GOMF name	GOCC name	Peptides	Razor + unique peptides	Unique peptides	Sequence coverage [%]	Unique + razor sequence coverage [%]	Unique sequence coverage [%]	Mol. weight [kDa]	Score	Intensity	MS/MS count	-Log Student's T-test p-value gsnor_WT	Student's T-test q-value gsnor_WT	Student's T-test Difference gsnor_WT	Student's T-test Test statistic gsnor_WT	Uniprot function	Uniprot tissue specificity	Uniprot subcellular location	z-score gsnor1	z-score gsnor2	z-score gsnor3	z-score gsnor4	z-score gsnor5	z-score WT1	z-score WT2	z-score WT3	z-score WT4	z-score WT5
AT3G57260	A0A1I9LMG6;P33157	Glucan endo-1,3-beta-glucosidase, acidic isoform	BG2	A0A1I9LMG6_ARATH;E13A_ARATH	BG2;BGL2	carbohydrate metabolic process;response to cold;systemic acquired resistance	cellulase activity;glucan endo-1,3-beta-D-glucosidase activity;glucan exo-1,3-beta-glucosidase activity;hydrolase activity, hydrolyzing O-glycosyl compounds	anchored component of plasma membrane;apoplast;cell wall;endoplasmic reticulum;vacuole	7	7	7	36.3	36.3	36.3	39.38	120.78	508590000	63	1.82352	0.0394139	-1.02939	-3.08453	Implicated in the defense of plants against pathogens(Probable). Not involved in plasmodesmal callose degradation andin the gating of plasmodesmata during tobamovirus infection(PubMed:23656331).		Endoplasmic reticulum{ECO:0000269|PubMed:23656331}. Secreted, extracellular space,apoplast {ECO:0000269|PubMed:23656331}. Secreted, cell wall{ECO:0000269|PubMed:23656331}. Note=Exported in the apoplast andsecreted to the cell wall under treatment with salicylic acid(SA). {ECO:0000269|PubMed:23656331}.	-0.647859	-0.160733	-0.833967	-0.795032	-1.0585	0.416517	-0.420819	0.482218	0.813165	2.20501
AT3G62120	A0A1I9LNS4;Q9M1R2		T17J13.80	A0A1I9LNS4_ARATH;SYPC_ARATH		prolyl-tRNA aminoacylation	ATP binding;proline-tRNA ligase activity	aminoacyl-tRNA synthetase multienzyme complex;cytoplasm;cytosol;membrane;plasmodesma	28	28	28	55.7	55.7	55.7	59.173	146.72	2896200000	344	1.90238	0.0354925	0.268894	3.20487	Catalyzes the attachment of proline to tRNA(Pro) in atwo-step reaction: proline is first activated by ATP to form Pro-AMP and then transferred to the acceptor end of tRNA(Pro)		Cytoplasm, cytosol{ECO:0000305|PubMed:16251277, ECO:0000305|PubMed:16297076}.	0.157602	0.193465	0.912851	1.48669	0.805858	-2.05834	-0.0561424	-0.0813695	-0.489736	-0.870877
AT3G26060	A0A1I9LR27;F4JBC9;Q9LU86	Peroxiredoxin Q, chloroplastic	ATPRX Q;PRXQ	A0A1I9LR27_ARATH;F4JBC9_ARATH;PRXQ_ARATH	PRXQ	cell redox homeostasis;cellular response to oxidative stress	antioxidant activity;oxidoreductase activity;peroxiredoxin activity;thioredoxin peroxidase activity	cell;chloroplast;chloroplast envelope;chloroplast stromal thylakoid;chloroplast thylakoid;chloroplast thylakoid lumen;chloroplast thylakoid membrane;cytoplasm;plastoglobule	18	18	18	78.6	78.6	78.6	17.028	284.22	12039000000	347	3.18938	0.00393939	-0.401708	-5.39927	Thiol-specific peroxidase that catalyzes the reductionof hydrogen peroxide and organic hydroperoxides to water andalcohols, respectively. Plays a role in cell protection againstoxidative stress by detoxifying peroxides. Involved in thephotosystem II protection against hydrogen peroxide	Expressed in all tissues at the exception ofroots. {ECO:0000269|PubMed:16507087, ECO:0000269|Ref.6}.	Plastid, chloroplast thylakoid lumen{ECO:0000269|PubMed:16507087}.	-1.47876	-1.44635	-0.1037	-0.372282	-0.800692	0.568728	1.28099	0.699133	0.590266	1.06267
AT3G45970	A0A1I9LT21;Q9LZT4;Q9LZT5-2;Q9LZT5	Expansin-like A1	EXLA1	A0A1I9LT21_ARATH;EXLA1_ARATH	EXLA1			cell wall;extracellular region;Golgi apparatus;integral component of membrane;membrane;plant-type cell wall;plasmodesma	3	3	3	15.5	15.5	15.5	25.925	4.1995	214340000	12	2.55251	0.013136	2.02651	4.24922			Single-pass type Imembrane protein {ECO:0000305}.;Membrane {ECO:0000305}	-0.223252	1.23388	1.06609	0.88446	0.987462	-1.54122	-1.01732	-0.11845	-1.02372	-0.247934
AT1G48090	A0A1P8AMQ8;A0A1P8AMP4;F4HWS2;A0A1P8AMP6;A0A1P8AMQ1		At1g48090	A0A1P8AMP4_ARATH;A0A1P8AMP6_ARATH;A0A1P8AMQ1_ARATH;A0A1P8AMQ8_ARATH;F4HWS2_ARATH		protein retention in Golgi apparatus;protein targeting to vacuole		cell;chloroplast;extrinsic component of membrane;plasmodesma	2	2	2	1	1	1	457.42	5.8669	25338000	10	2.17484	0.0227899	1.07184	3.62991				0.0329421	1.45502	1.51174	-0.0493305	0.791271	-1.47269	-0.280003	-0.849	-0.988395	-0.151554
AT1G01320	F4HS98;A0A1P8AR50;F4HS99		At1g01320	A0A1P8AR50_ARATH;F4HS98_ARATH;F4HS99_ARATH				cytoplasm;cytosol;nucleus	21	16	16	19.2	15.9	15.9	197.5	171.98	1107900000	163	2.05318	0.0277107	0.396043	3.43818				1.01106	0.339869	-0.451543	1.27326	1.49052	-0.187629	-1.21187	-0.399006	-0.47735	-1.38731
AT1G11910	A0A1P8AV08;O65390;Q8VYL3;A0A1P8AVA7	Aspartic proteinase A1	APA1	A0A1P8AV08_ARATH;APA1_ARATH	APA1	lipid metabolic process;protein catabolic process;proteolysis;response to cytokinin;response to salt stress	aspartic-type endopeptidase activity;endopeptidase activity	cytosol;plasmodesma;vacuole	17	17	17	42.6	42.6	42.6	56.036	323.31	7264300000	398	2.79668	0.00908	-0.533813	-4.67263	Involved in the breakdown of propeptides of storageproteins in protein-storage vacuoles (By similarity). Possessesaspartic protease activity in vitro.	Expressed in roots, leaves, stems, petals,carpels, seed pods and dry seeds. {ECO:0000269|PubMed:12230581}.	Vacuole {ECO:0000269|PubMed:17012602}.Note=Located in protein storage vacuoles (PSV) of the embryo.	-0.940734	0.010716	-0.21329	-1.16881	-1.74578	0.318115	1.00109	0.800437	0.840541	1.09771
AT1G52360	A0A1P8AV73;F4ICX0;Q9C827	Coatomer subunit beta-2	At1g52360	A0A1P8AV73_ARATH;COB22_ARATH;F4ICX0_ARATH		endoplasmic reticulum to Golgi vesicle-mediated transport;intracellular protein transport;intra-Golgi vesicle-mediated transport;retrograde vesicle-mediated transport, Golgi to endoplasmic reticulum;vesicle-mediated transport	structural molecule activity	COPI vesicle coat;COPI-coated vesicle membrane;cytosol;Golgi membrane;membrane coat	17	17	5	24.4	24.4	8.4	104.22	47.962	1763800000	218	2.14439	0.0235881	-0.247926	-3.58161	The coatomer is a cytosolic protein complex that bindsto dilysine motifs and reversibly associates with Golgi non-clathrin-coated vesicles, which further mediate biosyntheticprotein transport from the ER, via the Golgi up to the trans Golginetwork. Coatomer complex is required for budding from Golgimembranes, and is essential for the retrograde Golgi-to-ERtransport of dilysine-tagged proteins;The…		Cytoplasmic side {ECO:0000250}. Note=The coatomeris cytoplasmic or polymerized on the cytoplasmic side of theGolgi, as well as on the vesicles/buds originating from it.{ECO:0000250}.; Cytoplasmic side{ECO:0000256|PIRNR:PIRNR005567}. Cytoplasmic vesicle, COPI-coatedvesicle membrane {ECO:0000256|PIRNR:PIRNR005567}; Cytoplasmic side{ECO:0000256|PIRNR:PIRNR005567}. Note=The coatomer is cytoplasmicor …	-0.773123	-0.394277	-0.53054	-0.544012	-1.48065	0.602504	1.13847	1.93003	0.23981	-0.188214
AT1G45201	F4HRB4;Q8L7S1;A0A1P8AVY3		TLL1	A0A1P8AVY3_ARATH;F4HRB4_ARATH;Q8L7S1_ARATH	TLL1	lipid metabolic process	hydrolase activity	integral component of membrane;membrane;vacuole	12	12	12	34.9	34.9	34.9	44.118	30.692	1949400000	139	3.91872	0.00196226	-1.1881	-6.93197				-0.717619	-0.420138	-0.656467	-1.51093	-1.08674	1.11549	0.822897	0.702779	1.35794	0.39279
AT2G23600	O80476;A0A1P8AXQ5;A0A1P8AXW0	Methylesterase 2	MES2	A0A1P8AXQ5_ARATH;MES2_ARATH	ACL;MES2	jasmonic acid metabolic process;nicotinate metabolic process;salicylic acid metabolic process	carboxylic ester hydrolase activity;hydrolase activity, acting on ester bonds;lyase activity;methyl indole-3-acetate esterase activity;methyl jasmonate esterase activity;methyl salicylate esterase activity		5	5	5	27.4	27.4	27.4	29.667	98.473	1885400000	97	3.762	0.002	0.410602	6.57988	Methylesterase shown to have carboxylesterase activity,methyl indole-3-acetic acid (MeIAA) esterase activity, methylsalicylate (MeSA) esterase activity and methyl jasmonate (MeJA)esterase activity in vitro.			1.53396	0.881846	0.470704	0.930956	0.540382	-1.26348	-1.29552	-0.355847	-0.56896	-0.874052
AT2G31750	A0A1P8B2S3;Q9SKC5	UDP-glycosyltransferase 74D1	UGT74D1	A0A1P8B2S3_ARATH;U74D1_ARATH	UGT74D1	auxin metabolic process	indole-3-butyrate beta-glucosyltransferase activity;quercetin 3-O-glucosyltransferase activity;quercetin 7-O-glucosyltransferase activity;transferase activity, transferring hexosyl groups;UDP-glycosyltransferase activity	intracellular membrane-bounded organelle	9	9	8	35.9	35.9	34.5	54.919	43.303	1046100000	105	3.93473	0.00208	1.00998	6.96872	Glucosyltransferase that glucosylates jasmonate (JA) andJA derivatives. Also active on indole-3-acetic acid (IAA), 4-coumrate, cinnamate and caffeate.	Expressed in leaves. {ECO:0000269|Ref.1}.		1.16387	0.554977	0.838889	0.803018	1.03444	-0.421937	-1.50933	-0.280393	-1.10007	-1.08347
AT4G20130	A0A1P8B373;Q84JF5		PTAC14	A0A1P8B373_ARATH;PTA14_ARATH	PTAC14	chloroplast organization;peptidyl-lysine monomethylation;plastid transcription;response to light stimulus;thylakoid membrane organization	protein-lysine N-methyltransferase activity	chloroplast;chloroplast thylakoid;nucleoid;plastid chromosome;plastid-encoded plastid RNA polymerase complex	3	3	3	15.9	15.9	15.9	42.411	2.0895	244350000	21	1.72116	0.0465594	1.60442	2.9298	Essential for chloroplast development, especially forthylakoid formation. Involved in plastid gene expression, probablyby maintaining plastid-encoded RNA polymerase (PEP) activity	Mostly expressed in leaves, flowers andseedlings, and, to a lower extent, in stems and roots.{ECO:0000269|PubMed:22010110}.	Plastid, chloroplast thylakoid{ECO:0000269|PubMed:22010110}.	0.922711	0.449186	0.583705	0.749464	0.707557	-0.819659	0.413871	-1.58706	-1.75249	0.332712
AT4G14230;AT4G14240	A0A1P8B407;Q67XQ0-2;Q67XQ0;Q4V3C7	DUF21 domain-containing protein At4g14240;DUF21 domain-containing protein At4g14230	CBSDUF1;CBSDUF2	A0A1P8B407_ARATH;Y4423_ARATH;Y4424_ARATH	CBSDUF1;CBSDUF2			integral component of membrane;mitochondrion	2	2	2	5.4	5.4	5.4	42.63	2.0559	111860000	26	2.04989	0.0278313	0.471436	3.43305			Multi-pass membraneprotein {ECO:0000305}.;Membrane {ECO:0000305}	0.844521	-0.369579	0.958244	1.52958	0.698188	-0.612252	-0.867669	0.260446	-1.55907	-0.882404
AT4G25080	A0A1P8B4G1;Q9SW18-2;Q9SW18	Magnesium protoporphyrin IX methyltransferase, chloroplastic	CHLM	A0A1P8B4G1_ARATH;CHLM_ARATH	CHLM	chlorophyll biosynthetic process	magnesium protoporphyrin IX methyltransferase activity	chloroplast;chloroplast envelope;chloroplast membrane;chloroplast thylakoid;chloroplast thylakoid membrane	17	17	17	48.5	48.5	48.5	35.592	113.22	4027800000	256	2.03853	0.0283725	0.306306	3.41531	Converts Mg-protoporphyrin IX to Mg-protoporphyrin IXmethylester using S-adenosyl-L-methionine as a cofactor. Involvedin chloroplast-to-nucleus signaling by acting as a negativeeffector of nuclear photosynthetic gene expression		Peripheral membrane protein{ECO:0000269|PubMed:11784318}. Plastid, chloroplast thylakoidmembrane {ECO:0000269|PubMed:11784318}; Peripheral membraneprotein {ECO:0000269|PubMed:11784318}.;Plastid, chloroplast membrane{ECO:0000269|PubMed:11784318}	0.55511	1.36688	0.366942	1.31241	0.051918	-0.543989	-0.542606	-0.035255	-0.501485	-2.02993
AT4G12800	A0A1P8B6D0;Q9SUI4	Photosystem I reaction center subunit XI, chloroplastic	PSAL	A0A1P8B6D0_ARATH;PSAL_ARATH	PSAL	photosynthesis	protein domain specific binding	chloroplast;chloroplast envelope;chloroplast membrane;chloroplast thylakoid;chloroplast thylakoid membrane;integral component of membrane;membrane;photosystem I reaction center;plastoglobule;thylakoid	10	10	10	35.6	35.6	35.6	30.441	210.03	21712000000	264	2.92629	0.00689017	-0.854334	-4.90586			Multi-pass membrane protein {ECO:0000255}.;Plastid, chloroplast membrane {ECO:0000255}	-0.961895	-1.02247	-0.870217	-0.615881	-0.638898	1.88508	1.25269	0.369101	0.449634	0.15285
AT4G16660	A0A1P8B8R9;F4JMJ1	Heat shock 70 kDa protein 17	HSP70-17	A0A1P8B8R9_ARATH;HSP7R_ARATH	HSP70-17	cellular response to hypoxia;negative regulation of hypoxia-induced intrinsic apoptotic signaling pathway	ATP binding	chloroplast;endoplasmic reticulum;endoplasmic reticulum chaperone complex;endoplasmic reticulum lumen;Golgi apparatus;vacuolar membrane	23	23	23	30.8	30.8	30.8	99.643	107.14	1187200000	163	3.62219	0.00278947	-0.498946	-6.27685			Endoplasmic reticulum lumen{ECO:0000255|PROSITE-ProRule:PRU10138}.	-0.645915	-0.91468	-0.719708	-0.343201	-1.70113	0.498841	0.504231	1.12009	1.2342	0.967266
AT4G09010	A0A1P8B8W6;A0A1P8B8Y3;P82281	Thylakoid lumenal 29 kDa protein, chloroplastic	TL29	A0A1P8B8W6_ARATH;A0A1P8B8Y3_ARATH;TL29_ARATH	TL29	cellular response to oxidative stress;hydrogen peroxide catabolic process;response to oxidative stress;response to reactive oxygen species	heme binding;peroxidase activity	chloroplast;chloroplast thylakoid;chloroplast thylakoid lumen;chloroplast thylakoid membrane;cytoplasm;nucleus;thylakoid;thylakoid lumen	23	23	23	84.2	84.2	84.2	31.041	323.31	18485000000	506	1.77069	0.0432713	-0.18504	-3.00449			Plastid, chloroplast thylakoid lumen{ECO:0000269|PubMed:11034343, ECO:0000269|PubMed:11719511,ECO:0000269|PubMed:19828564}.	0.14019	0.230189	-1.15299	-0.948765	-1.7224	-0.101439	1.03917	0.455997	0.635567	1.42448
AT5G63840	A0A1P8BAU5;Q9FN05	Probable glucan 1,3-alpha-glucosidase	PSL5	A0A1P8BAU5_ARATH;PSL5_ARATH	PSL5;RSW3	carbohydrate metabolic process;cellulose biosynthetic process;defense response to bacterium;response to cadmium ion;unidimensional cell growth	carbohydrate binding;glucan 1,3-alpha-glucosidase activity;glucosidase activity;hydrolase activity, hydrolyzing O-glycosyl compounds	chloroplast;endoplasmic reticulum	13	13	13	17.9	17.9	17.9	107.39	27.403	1203100000	137	2.05982	0.0273484	-0.334509	-3.44856	Cleaves sequentially the 2 innermost alpha-1,3-linkedglucose residues from the Glc(2)Man(9)GlcNAc(2) oligosaccharideprecursor of immature glycoproteins (By similarity). Essential forstable accumulation of the receptor EFR that determines thespecific perception of bacterial elongation factor Tu (EF-Tu), apotent elicitor of the defense response to pathogen-associatedmolecular patterns (PAMPs). Requ…	Expressed in roots, rosette leaves, leafblades, mature stems, cauline leaves, flower buds, flowers andsiliques. {ECO:0000269|PubMed:12492837}.	Endoplasmic reticulum {ECO:0000250}.	-0.997595	-0.531965	-1.41092	0.733938	-1.46108	1.0923	0.290032	0.883329	0.607518	0.794434
AT5G22800	A0A1P8BCC6;Q9FFC7	Probable alanine--tRNA ligase, chloroplastic	EMB86	A0A1P8BCC6_ARATH;SYAP_ARATH	EMB1030;EMB86	alanyl-tRNA aminoacylation;embryo development ending in seed dormancy;tRNA modification	alanine-tRNA ligase activity;amino acid binding;ATP binding;tRNA binding;zinc ion binding	chloroplast;chloroplast stroma;cytosol;integral component of membrane;membrane;mitochondrion	32	32	32	39.6	39.6	39.6	111.07	280.86	3052400000	339	2.86223	0.00770213	0.364629	4.78981	Catalyzes the attachment of alanine to tRNA(Ala) in atwo-step reaction: alanine is first activated by ATP to form Ala-AMP and then transferred to the acceptor end of tRNA(Ala). Alsoedits incorrectly charged tRNA(Ala) via its editing domain		Plastid, chloroplast {ECO:0000256|HAMAP-Rule:MF_03134}. Mitochondrion {ECO:0000256|HAMAP-Rule:MF_03134}.;Plastid, chloroplast{ECO:0000269|PubMed:18431481}. Mitochondrion {ECO:0000255|HAMAP-Rule:MF_03134}.	1.5356	0.223033	0.052195	1.0381	1.23552	-0.423358	-1.24722	-0.352177	-1.05528	-1.00641
AT5G67385	A0A1P8BEF2;Q66GP0	BTB/POZ domain-containing protein At5g67385		A0A1P8BEF2_ARATH;SR1P1_ARATH	SR1IP1	defense response to bacterium;protein ubiquitination			6	6	6	13.2	13.2	13.2	62.595	10.696	123640000	24	1.90389	0.0355248	0.344165	3.20718	Acts as a substrate-specific adapter of an E3 ubiquitin-protein ligase complex (CUL3-RBX1-BTB) which mediates theubiquitination and subsequent proteasomal degradation of targetproteins (Probable). Involved in disease resistance. Acts as asubstrate adapter that recruits CAMTA3/SR1 for ubiquitination anddegradation during pathogen infection. Acts as positive regulatorof plant defense by removing th…			1.23795	-0.69383	1.32979	1.01263	0.671046	0.113611	-0.627395	-1.15771	-1.27208	-0.614019
AT5G02940	A0A1P8BF77;Q8VZM7	Putative ion channel POLLUX-like 1		A0A1P8BF77_ARATH;POLL1_ARATH		potassium ion transport		chloroplast;chloroplast envelope;integral component of membrane	19	19	15	28.7	28.7	24.3	94.82	66.777	1862500000	174	2.21845	0.0219351	-0.266381	-3.69948			Multi-pass membraneprotein {ECO:0000250}.;Membrane {ECO:0000250}	-1.41746	-0.0407487	-0.901677	0.0649436	-1.47332	0.499747	0.468588	1.32918	1.32003	0.150713
AT1G11860	A0A2H1ZEA9;O65396	Aminomethyltransferase, mitochondrial	GDCST	A0A2H1ZEA9_ARATH;GCST_ARATH	GDCST	glycine catabolic process;glycine decarboxylation via glycine cleavage system;response to cadmium ion	aminomethyltransferase activity;transaminase activity	apoplast;chloroplast;chloroplast envelope;chloroplast stroma;chloroplast thylakoid;cytosolic ribosome;membrane;mitochondrion	37	37	37	77.1	77.1	77.1	46.352	323.31	73593000000	1072	3.17067	0.00444444	-0.288794	-5.36325	The glycine cleavage system catalyzes the degradation ofglycine.;The glycine decarboxylase (GDC) or glycine cleavagesystem catalyzes the degradation of glycine.		Mitochondrion {ECO:0000250}.;Mitochondrion{ECO:0000256|RuleBase:RU003981}.	-0.349802	-0.959105	-0.732232	-1.14789	-1.00668	1.23662	1.2832	1.17666	0.699923	-0.200696
AT2G07698	A0A2P2CLF9;P92549;F4IMB5	ATP synthase subunit alpha, mitochondrial;ATP synthase subunit alpha	ATPA;At2g07698	A0A2P2CLF9_ARATH;ATPAM_ARATH;F4IMB5_ARATH	atp1;ATPA	ATP biosynthetic process;ATP metabolic process;ATP synthesis coupled proton transport;electron transport chain;response to cytokinin;response to oxidative stress	ADP binding;ATP binding;poly(U) RNA binding;proton-transporting ATP synthase activity, rotational mechanism;zinc ion binding	chloroplast;chloroplast envelope;integral component of membrane;membrane;mitochondrial inner membrane;mitochondrial proton-transporting ATP synthase complex, catalytic core F(1);mitochondrion;nucleolus;proton-transporting ATP synthase complex, catalytic core F(1);vacuolar membrane;vacuole	32	31	31	63.7	62.3	62.3	55.103	323.31	53037000000	908	3.19616	0.00396947	-0.261028	-5.41237	Mitochondrial membrane ATP synthase (F(1)F(0) ATPsynthase or Complex V) produces ATP from ADP in the presence of aproton gradient across the membrane which is generated by electrontransport complexes of the respiratory chain. F-type ATPasesconsist of two structural domains, F(1) - containing theextramembraneous catalytic core, and F(0) - containing themembrane proton channel, linked together by a…		Mitochondrion {ECO:0000269|PubMed:11743114,ECO:0000269|PubMed:14671022}. Mitochondrion inner membrane{ECO:0000305}. Note=Peripheral membrane protein. {ECO:0000305}.;Mitochondrion{ECO:0000256|RuleBase:RU000342}.	-0.541664	-0.290113	-0.629397	-1.24601	-1.4968	0.828863	1.4833	0.789149	0.154179	0.948494
	A0A2P2CLH2;P93306	NADH dehydrogenase [ubiquinone] iron-sulfur protein 2	NAD7	A0A2P2CLH2_ARATH;NDUS2_ARATH	nad7;NAD7		NAD binding;NADH dehydrogenase activity;quinone binding	mitochondrion;respirasome	12	12	12	47.2	47.2	47.2	45.003	79.383	2371000000	193	2.31292	0.0194455	-0.295034	-3.85182	Core subunit of the mitochondrial membrane respiratorychain NADH dehydrogenase (Complex I) that is believed to belong tothe minimal assembly required for catalysis. Complex I functionsin the transfer of electrons from NADH to the respiratory chain.The immediate electron acceptor for the enzyme is believed to beubiquinone (By similarity). Component of the iron-sulfur (IP)fragment of the enzyme.		Mitochondrion {ECO:0000269|PubMed:14671022}.	-1.47576	-0.575062	0.501136	-1.0165	-1.25715	0.841729	1.04059	0.759262	0.0614757	1.12027
AT3G55260	A7WM73	Beta-hexosaminidase 1	HEXO1	HEXO1_ARATH	HEXO1	carbohydrate metabolic process	beta-N-acetylhexosaminidase activity;hexosaminidase activity;N-acetyl-beta-D-galactosaminidase activity	cytosol;plant-type cell wall;vacuole	13	13	13	31.8	31.8	31.8	61.229	110.13	1700400000	182	2.78842	0.00912315	-0.411213	-4.65797	Has a broad substrate specificity. Can use syntheticsubstrates such as pyridylaminated chitotriose, pyridylaminatedchitobiose, p-nitrophenyl-beta-N-acetylglucosaminide, p-nitrophenyl-2-acetamido-2-deoxy-beta-D-glucopyranoside (pNP-GlcNAc), p-nitrophenyl-2-acetamido-2-deoxy-beta-D-galactopyranoside (pNP-GalNAc), 4-methylumbelliferyl-2-acetamido-2-deoxy-beta-D-glucopyranoside (MU-GlcNAc), and 4-met…	Expressed in roots, leaves, stems, flowers andsiliques. {ECO:0000269|PubMed:17644627}.	Vacuole {ECO:0000269|PubMed:17644627,ECO:0000269|PubMed:21252225}.	-1.05096	0.0821364	-0.840201	-1.14326	-1.10218	0.575576	0.913363	-0.0741566	1.3744	1.26528
AT2G22990	Q3EBW0;F4IKK4;A8MR78;Q8RUW5;Q8RUW5-2;A8MQW0	Serine carboxypeptidase-like 8	SNG1;SCPL8	A8MQW0_ARATH;A8MR78_ARATH;F4IKK4_ARATH;Q3EBW0_ARATH;SCP8_ARATH	SCPL8;SNG1	phenylpropanoid metabolic process;secondary metabolic process	serine-type carboxypeptidase activity;sinapoylglucose-malate O-sinapoyltransferase activity;sinapoylglucose-sinapoylglucose O-sinapoyltransferase activity	vacuole	5	5	5	29.2	29.2	29.2	36.8	131.48	984910000	91	3.03214	0.00523077	0.907122	5.10103	Involved in plants secondary metabolism. Functions asacyltransferase to form the sinapate ester sinapoylmalate. Alsocapable of catalyzing the formation of 1,2-bis-O-sinapoyl beta-D-glucoside.	Highly expressed in seedlings. Expressed inleaves, stems, flowers and siliques, and at low levels in roots.{ECO:0000269|PubMed:10948250, ECO:0000269|PubMed:12012238,ECO:0000269|PubMed:15908604}.	Vacuole {ECO:0000269|PubMed:12012238}.	0.933799	0.291687	0.300699	1.38896	1.23323	-0.0520719	-0.815514	-0.815748	-1.48844	-0.976606
AT2G47940	B3H581;O82261	Protease Do-like 2, chloroplastic	DEGP2	B3H581_ARATH;DEGP2_ARATH	DEG2;DEGP2	chloroplast organization;photosystem II repair;protein catabolic process	serine-type endopeptidase activity	chloroplast;chloroplast envelope;chloroplast stroma;chloroplast stromal thylakoid;chloroplast thylakoid membrane	18	18	18	37.3	37.3	37.3	66.673	124.04	1916800000	274	2.8986	0.00733333	0.382056	4.8555	Serine protease that performs the primary cleavage ofthe photodamaged D1 protein in plant photosystem II		Peripheral membrane protein{ECO:0000269|PubMed:11179216}; Stromal side{ECO:0000269|PubMed:11179216}.;Plastid, chloroplast thylakoid membrane{ECO:0000269|PubMed:11179216}	0.536422	0.942776	-0.0161536	1.55107	1.0846	-0.778933	-0.444762	-0.302525	-1.42054	-1.15196
AT3G49680	B3H658;Q9M401	Branched-chain-amino-acid aminotransferase;Branched-chain-amino-acid aminotransferase 3, chloroplastic	BCAT3	B3H658_ARATH;BCAT3_ARATH	BCAT3	branched-chain amino acid biosynthetic process;isoleucine biosynthetic process;leucine biosynthetic process;valine biosynthetic process	branched-chain-amino-acid transaminase activity;L-isoleucine transaminase activity;L-leucine transaminase activity;L-valine transaminase activity	chloroplast;chloroplast stroma	7	7	6	26.8	26.8	24.3	44.731	43.244	1233100000	110	2.65534	0.0113684	0.364141	4.42512	Converts 2-oxo acids to branched-chain amino acids. Actson leucine, isoleucine and valine. Also involved in methioninechain elongation cycle of aliphatic glucosinolate formation.Catalyzes the conversion of 5-methylthiopentyl-2-oxo and 6-methylthiohexyl-2-oxo acids to their respective Met derivatives,homomethionine and dihomo-methionine, respectively	Expressed in the phloem cells.{ECO:0000269|PubMed:18162591}.	Plastid, chloroplast{ECO:0000269|PubMed:25070638}.	0.584853	0.422785	0.0946039	1.91554	0.978961	-0.742223	-0.276485	-0.57771	-1.18095	-1.21938
AT1G70070	B9DFG3	DEAD-box ATP-dependent RNA helicase ISE2, chloroplastic	ISE2	ISE2_ARATH	ISE2	embryo development ending in seed dormancy;gene silencing by RNA;Group II intron splicing;mRNA processing;plasmodesmata-mediated intercellular transport;posttranscriptional gene silencing	ATP binding;RNA binding;RNA helicase activity	chloroplast;chloroplast stroma;cytoplasmic stress granule	8	8	8	10.5	10.5	10.5	132.44	10.026	82895000	31	2.53663	0.0134745	0.682609	4.22236	RNA helicase involved in group II intron splicing(PubMed:26147377). Essential protein required duringembryogenesis. Involved in post-transcriptional gene silencing.Modulates the determination of cell fate. Necessary for normalplasmodesmata (PD) development and aperture regulation		Plastid, chloroplast{ECO:0000269|PubMed:18431481, ECO:0000269|PubMed:22106293,ECO:0000269|PubMed:26147377}. Cytoplasmic granule{ECO:0000269|PubMed:17601829}. Note=Localizes to granule-likestructures, probably stress granules (SGs), which number increasesupon stress. {ECO:0000269|PubMed:17601829}.	1.6014	0.151717	0.399301	0.600918	1.18759	-0.824752	-1.66616	-0.168615	-0.344177	-0.937217
AT1G26850	B9DFI7;B9DFI7-2;F4HPE1;Q9SZX8;Q9C884	Probable methyltransferase PMT2	At1g26850	F4HPE1_ARATH;PMT2_ARATH			methyltransferase activity	endosome;Golgi apparatus;Golgi membrane;integral component of membrane;membrane;trans-Golgi network	11	11	11	23.4	23.4	23.4	69.622	21.388	389560000	65	1.77589	0.0429084	0.325381	3.01234			Golgi apparatus membrane {ECO:0000305};Single-pass type II membrane protein {ECO:0000305}.	1.10567	0.288541	-0.323471	1.16907	1.21818	-0.843351	-0.595225	-0.119291	0.0127096	-1.91284
AT5G37510	B9DFQ9;Q9FGI6	NADH dehydrogenase [ubiquinone] iron-sulfur protein 1, mitochondrial	EMB1467	B9DFQ9_ARATH;NDUS1_ARATH	EMB1467	ATP synthesis coupled electron transport;cellular respiration;photorespiration;response to oxidative stress	2 iron, 2 sulfur cluster binding;4 iron, 4 sulfur cluster binding;electron transfer activity;iron-sulfur cluster binding;metal ion binding;NADH dehydrogenase (ubiquinone) activity	chloroplast;membrane;mitochondrial membrane;mitochondrial respiratory chain complex I;mitochondrion;plasma membrane respiratory chain complex I;respiratory chain complex I	29	29	29	50.9	50.9	50.9	81.181	271.19	5693200000	455	4.04525	0.00186667	-0.492186	-7.22634	Core subunit of the mitochondrial membrane respiratorychain NADH dehydrogenase (Complex I) that is believed to belong tothe minimal assembly required for catalysis. Complex I functionsin the transfer of electrons from NADH to the respiratory chain.The immediate electron acceptor for the enzyme is believed to beubiquinone (By similarity). This is the largest subunit of complexI and it is a compone…		Mitochondrion inner membrane {ECO:0000250}.Note=Matrix and cytoplasmic side of the mitochondrial innermembrane. {ECO:0000250}.	-1.29031	-0.722266	-0.378293	-1.05485	-0.971401	0.775091	0.863445	0.704279	0.480239	1.59407
AT5G36880	B9DGD6;B9DGD6-2;A0A1P8BCV2	Acetyl-coenzyme A synthetase, chloroplastic/glyoxysomal	ACS	A0A1P8BCV2_ARATH;ACS_ARATH	ACS	acetate metabolic process;acetyl-CoA biosynthetic process from acetate;fatty acid metabolic process	acetate-CoA ligase activity;AMP binding;ATP binding	chloroplast;chloroplast stroma;cytosol;glyoxysome	17	17	17	30.6	30.6	30.6	81.888	70.162	2278600000	169	3.16644	0.00470588	-0.513395	-5.35512	Catalyzes the production of acetyl-CoA, an activatedform of acetate that can be used for lipid synthesis or for energygeneration. May play a limited role in the biosynthesis of lipids	Expressed in leaves, flower buds and youngflowers. {ECO:0000269|PubMed:10859180}.	Plastid, chloroplast. Glyoxysome.	-0.72921	-0.446342	-0.320366	-1.22807	-1.47033	0.469977	1.13595	0.722197	1.53401	0.332189
AT2G44210	O64856;B9DGK6		At2g44210	B9DGK6_ARATH;O64856_ARATH					3	3	3	13.5	13.5	13.5	46.527	54.853	724610000	46	1.79452	0.0414961	-0.403798	-3.04054				-1.13051	-0.21112	-1.49511	-0.463883	-0.172437	0.720806	0.75359	-0.654969	1.04416	1.60947
AT1G04750;AT2G33120	B9DH97;Q9ZTW3;P47192;A0A1P8AS81;F4IVQ2;Q9MAS5;O48850;Q6AWV9;F4J7T4	Vesicle-associated membrane protein 721;Vesicle-associated membrane protein 722	SAR1;VAMP721;VAMP722	A0A1P8AS81_ARATH;B9DH97_ARATH;VA721_ARATH;VA722_ARATH	SAR1;VAMP721;VAMP722	cell plate formation involved in plant-type cell wall biogenesis;exocytosis;protein transport;vesicle fusion;vesicle-mediated transport	SNAP receptor activity;SNARE binding	cell plate;early endosome membrane;endosome;integral component of membrane;plasma membrane;plasmodesma;SNARE complex;vacuolar membrane	5	5	5	28.8	28.8	28.8	25.812	12.889	1330300000	87	2.06245	0.0273367	-0.378526	-3.45268	Involved in the targeting and/or fusion of transportvesicles to their target membrane.	Expressed in flowers, leaves, stems and roots.{ECO:0000269|PubMed:15342965}.;Highly expressed in stems and roots. Detectedin flowers and leaves. {ECO:0000269|PubMed:15342965}.	Single-pass type IV membraneprotein {ECO:0000250|UniProtKB:Q12255}.;Cell membrane {ECO:0000269|PubMed:15342965};Single-pass type IV membrane protein{ECO:0000250|UniProtKB:Q12255}. Early endosome membrane{ECO:0000269|PubMed:15342965}	-1.07943	-0.421703	-0.899984	-0.859514	-0.408745	0.536272	-0.270162	0.275872	2.11787	1.00952
AT1G66970	Q7Y208;F4HQ30;A0A1P8AQY3	Glycerophosphodiester phosphodiesterase GDPDL1	GDPDL1;SVL2	A0A1P8AQY3_ARATH;F4HQ30_ARATH;GPDL1_ARATH	GDPDL1;SVL2	cellular phosphate ion homeostasis;glycerol metabolic process;lipid metabolic process	calcium ion binding;glycerophosphodiester phosphodiesterase activity;phosphoric diester hydrolase activity	anchored component of membrane;anchored component of plasma membrane;apoplast;chloroplast;integral component of membrane;plasma membrane	23	23	20	38.9	38.9	36.4	83.787	323.31	14025000000	436	2.54647	0.0131587	-0.572828	-4.23899	Hydrolyzes glycerolphosphoglycerol,glycerophosphocholine and glycerophosphoethanolamine in vitro	Expressed in rosette and cauline leaves,stems, flowers and siliques. {ECO:0000269|PubMed:21323773}.	Single-passtype I membrane protein {ECO:0000255}.;Cell membrane {ECO:0000305}	-0.8037	0.0423656	-0.35349	-1.38401	-1.44688	0.227597	0.709438	0.361453	1.20381	1.44342
AT1G20450	F4HST2;P42759	Dehydrin ERD10	ERD10	ERD10_ARATH;F4HST2_ARATH	ERD10	cold acclimation;protein stabilization;regulation of membrane permeability;regulation of seed germination;response to abscisic acid;response to cold;response to water;response to water deprivation	actin binding;copper ion binding;nickel cation binding;phosphatidylcholine binding;phosphatidylserine binding	cytoplasm;cytosol;extrinsic component of membrane;membrane;nucleus;plasmodesma	8	6	6	33.2	29	29	29.443	261.99	979230000	117	2.08443	0.0267325	-0.838052	-3.48711		In stems, cauline leaves, roots and flowers.Low levels found in maturing seeds. Absent in dry seeds.		-1.6032	0.114455	-0.0293068	-1.21015	-0.955742	0.00958	0.757082	0.387521	1.50429	1.02547
AT1G08450	F4HW29;O04153;F4HW30	Calreticulin-3	CRT3	CALR3_ARATH;F4HW29_ARATH;F4HW30_ARATH	CRT3	anthocyanin-containing compound metabolic process;defense response signaling pathway, resistance gene-independent;defense response to bacterium;plant-type hypersensitive response;protein folding	calcium ion binding;carbohydrate binding;unfolded protein binding	endoplasmic reticulum;endoplasmic reticulum lumen;endoplasmic reticulum membrane	9	9	9	34.9	34.9	34.9	43.594	138.65	793920000	104	2.86727	0.00774332	-0.819776	-4.79888	Molecular calcium-binding chaperone promoting folding,oligomeric assembly and quality control in the ER via thecalreticulin/calnexin cycle. This lectin may interact transientlywith almost all of the monoglucosylated glycoproteins that aresynthesized in the ER. Required for elongation factor Tu receptor(EFR) accumulation and for EFR, but not flagellin-sensing 2 (FLS2)signaling.		Endoplasmic reticulum lumen{ECO:0000255|PROSITE-ProRule:PRU10138,ECO:0000269|PubMed:19717464}.;Endoplasmic reticulum{ECO:0000256|SAAS:SAAS00583789}.	-0.72556	-0.39786	-0.140313	-1.94575	-0.876963	1.26829	0.573625	1.02656	0.548026	0.669943
AT1G48420	F4HYF3-2;F4HYF3	Bifunctional D-cysteine desulfhydrase/1-aminocyclopropane-1-carboxylate deaminase, mitochondrial	DCD	DCYD1_ARATH	DCD	D-cysteine catabolic process;ethylene biosynthetic process;response to cadmium ion	cobalt ion binding;D-cysteine desulfhydrase activity;hydrolase activity	chloroplast;cytosol;mitochondrion	10	10	10	42.7	42.7	42.7	41.688	91.369	1253700000	133	2.56418	0.0132787	-0.543288	-4.269	Catalyzes the production of hydrogen sulfide (H2S) fromcysteine. Is mainly responsible for the degradation of cysteine togenerate H2S, a regulator of stomatal movement and closure. Hashigh affinity for D-cysteine.Possesses 1-aminocyclopropane-1-carboxylic acid (ACC)deaminase activity. Acts as a regulator of ACC levels and causeschanges in ethylene levels.	Highly expressed in stems and cauline leaves,and at lower levels in roots, rosette leaves and flowers.{ECO:0000269|PubMed:21986537}.	Mitochondrion {ECO:0000269|PubMed:15720402}.	-0.955903	-1.07181	0.146134	-1.89311	-0.179575	0.800268	0.625955	1.14134	0.736121	0.650577
AT1G09130	F4HZE0;Q8L770	ATP-dependent Clp protease proteolytic subunit;ATP-dependent Clp protease proteolytic subunit-related protein 3, chloroplastic	At1g09130;CLPR3	CLPR3_ARATH;F4HZE0_ARATH	CLPR3	protein quality control for misfolded or incompletely synthesized proteins	ATPase binding;ATP-dependent peptidase activity;serine-type endopeptidase activity	chloroplast;chloroplast envelope;chloroplast stroma;endopeptidase Clp complex;mitochondrion;plastid stroma;thylakoid	10	10	10	28.6	28.6	28.6	40.919	24.811	2331800000	169	1.82145	0.0395889	0.295686	3.08139			Plastid, chloroplast{ECO:0000269|PubMed:14593120}.	1.20046	0.568223	-0.791022	1.15886	1.35795	0.0726553	-0.592946	-0.737617	-1.2214	-1.01516
AT1G69200	F4I0K2	Fructokinase-like 2, chloroplastic	FLN2	SCKL2_ARATH	FLN2	chloroplast organization;etioplast organization;plastid transcription;regulation of transcription, DNA-templated	carbohydrate kinase activity;fructokinase activity	chloroplast nucleoid;cytoplasm;nucleoid;plastid-encoded plastid RNA polymerase complex	9	9	9	18.6	18.6	18.6	68.979	20.229	211750000	54	2.64578	0.0117555	1.02937	4.40861	Required for proper chloroplast development, most likelythrough regulating plastid-encoded polymerase (PEP) dependentchloroplast transcription. Acts as a component of thetranscriptionally active plastid chromosome that is required forplastid gene expression.		Plastid, chloroplast{ECO:0000269|PubMed:20511297}.	-0.0227236	-0.0480796	1.42942	1.52076	1.11302	-0.867194	-0.940283	-0.490334	-1.05943	-0.635159
AT1G03630	F4I2F8;O48741	Protochlorophyllide reductase C, chloroplastic	POR C;PORC	F4I2F8_ARATH;PORC_ARATH	POR;PORC	chlorophyll biosynthetic process;photosynthesis	NADPH dehydrogenase activity;protochlorophyllide reductase activity	chloroplast;chloroplast envelope;chloroplast membrane;chloroplast thylakoid;chloroplast thylakoid membrane	22	19	19	60.9	57.1	57.1	43.625	323.31	6771800000	347	1.99365	0.0304299	0.577113	3.34555	Phototransformation of protochlorophyllide (Pchlide) tochlorophyllide (Chlide).	Expressed in flowers, upper leaves, rosetteand cauline leaves, stem. Not detectable in non-photosynthetictissues such as roots and seeds. {ECO:0000269|PubMed:10838072}.	Plastid, chloroplast membrane{ECO:0000269|PubMed:22212719}. Note=Prolamellar body of etiolatedseedling.;Plastid, chloroplast{ECO:0000256|RuleBase:RU365001}.	1.94059	-0.245674	0.417401	0.684444	0.825587	-0.099886	-0.674513	-0.319099	-1.05809	-1.47076
AT1G63660	F4I3P5;Q9CAD1		At1g63660;F24D7.15	F4I3P5_ARATH;Q9CAD1_ARATH		glutamine metabolic process;GMP biosynthetic process	ATP binding;GMP synthase (glutamine-hydrolyzing) activity;GMP synthase activity;pyrophosphatase activity;transferase activity	cytosol	7	7	7	15.7	15.7	15.7	48.012	45.602	274030000	52	1.79435	0.0414313	0.942084	3.04027				0.176653	0.347072	0.827059	0.988145	1.13399	-2.23354	-0.222425	0.15583	-0.31091	-0.861865
AT1G76680	F4I403;Q8LAH7;Q8GYB8;A0A1P8AT55;Q8GYA3	12-oxophytodienoate reductase 1	OPR1	F4I403_ARATH;OPR1_ARATH	OPR1	lipid metabolic process;oxylipin biosynthetic process;oxylipin metabolic process;response to cadmium ion;response to salicylic acid;response to wounding	12-oxophytodienoate reductase activity;FMN binding;oxidoreductase activity	cytoplasm;cytosol	19	19	19	58.9	58.9	58.9	44.015	64.779	2096400000	168	4.88116	0	1.33014	9.42853	Specifically cleaves olefinic bonds in alpha,beta-unsaturated carbonyls and may be involved in detoxification ormodification of these reactive compounds (PubMed:9346960,PubMed:10872231). May be involved in the biosynthesis ormetabolism of oxylipin signaling molecules (Probable). In vitro,reduces 9R,13R-12-oxophytodienoic acid (9R,13R-OPDA) to 9R,13R-OPC-8:0, but only poorly 9S,13S-OPDA, the natur…	Mostly expressed in roots, also present inleaves, shoots and flowers. More abundant in cotyledons. In moredetails, expressed in peduncles, sepals, petals, around theabscission zone of siliques, maturing siliques and developingseeds. {ECO:0000269|PubMed:10333582}.	Cytoplasm {ECO:0000269|PubMed:12445129}.	0.789486	0.84335	0.928751	1.29693	0.684874	-1.20956	-0.476634	-0.56449	-1.23214	-1.06056
AT1G04270	F4I472;Q08112;Q9FIX6;Q9FY65	40S ribosomal protein S15-1	RPS15;RPS15A	F4I472_ARATH;RS151_ARATH	RPS15;RPS15A	ribosomal small subunit assembly;translation	RNA binding;structural constituent of ribosome	cytosol;cytosolic ribosome;cytosolic small ribosomal subunit;plasma membrane;plasmodesma;polysomal ribosome;small ribosomal subunit;vacuolar membrane	8	8	2	68.2	68.2	8.6	17.058	212.84	2628100000	186	2.0642	0.0272947	0.243996	3.45542			Cytoplasm.	0.058558	-0.155447	0.694512	2.01871	1.05421	-0.693041	-0.780956	-0.945838	-1.14332	-0.107391
AT1G12230	Q9FWX0;F4IC59		T28K15.4;At1g12230	F4IC59_ARATH;Q9FWX0_ARATH		carbohydrate metabolic process;pentose-phosphate shunt;pentose-phosphate shunt, non-oxidative branch	sedoheptulose-7-phosphate:D-glyceraldehyde-3-phosphate glyceronetransferase activity;zinc ion binding	chloroplast;chloroplast envelope;chloroplast stroma;cytoplasm	12	12	12	30.6	30.6	30.6	43.994	50.763	1144400000	107	3.90336	0.00185714	0.804475	6.89686				0.834267	0.817843	0.518305	0.786082	1.4322	-0.301302	-0.972154	-0.796813	-1.57094	-0.747483
AT1G52410	F4ICX9;F4ICX9-2	TSK-associating protein 1	TSA1	TSA1_ARATH	TSA1	defense response to fungus;photomorphogenesis	calcium ion binding	chloroplast thylakoid membrane;endoplasmic reticulum lumen;nuclear envelope;peroxisome;vacuole	24	24	24	54	54	54	84.375	238.6	737980000	138	4.28502	0.00186667	-4.23887	-7.81037	Involved in seedling development in the dark. May beinvolved, when interacting with TSK, in the organization ofspindle microtubules and may participate, when interacting withGIP1, in structural links between the nuclear envelope and thecytoskeleton.	Expressed preferentially in flowers and shootapex. {ECO:0000269|PubMed:15964904}.	Endoplasmic reticulum lumen. Nucleusenvelope {ECO:0000269|PubMed:15964904,ECO:0000269|PubMed:24348487}. Cytoplasm{ECO:0000269|PubMed:15964904, ECO:0000269|PubMed:24348487}.Note=In interphase, found in ER bodies and at the nuclear envelope(PubMed:24348487). During mitosis, concentrates in limited areasclose to the ends of spindle microtubules ahead of separatingchromatids (PubMed:15964904). {ECO:0…	-0.772547	-0.369628	-0.728843	-1.21552	-1.37344	0.392909	1.15194	1.07394	1.06524	0.775954
AT2G04842	F4IFC5		EMB2761	SYTM2_ARATH	EMB2761	embryo development ending in seed dormancy;threonyl-tRNA aminoacylation	ATP binding;metal ion binding;threonine-tRNA ligase activity	chloroplast;chloroplast stroma;cytoplasm;mitochondrion	14	14	14	32.3	32.3	32.3	74.784	59.054	857280000	132	2.29711	0.0197134	0.500804	3.82617			Plastid, chloroplast{ECO:0000269|PubMed:16251277}. Mitochondrion{ECO:0000269|PubMed:16251277}.	0.483787	0.596878	0.0639838	1.18106	1.48865	-1.79079	-0.680776	-0.235144	-0.0765935	-1.03105
AT2G39850	F4IG09		At2g39850	SBT41_ARATH	SBT4.1		serine-type endopeptidase activity	extracellular region;plant-type cell wall	10	10	10	21	21	21	87.919	45.23	370460000	51	2.44614	0.0158123	-1.87385	-4.07073			Secreted {ECO:0000250|UniProtKB:Q84WS0}.	-0.338447	-0.279024	-1.19822	-0.253205	-1.82652	0.724671	1.33418	0.397272	1.20585	0.233437
AT2G28470	F4IIQ3;Q9SCV4;A0A1P8AZB4;A0A1P8ANA8;A0A1P8ANB0;Q8GX69	Beta-galactosidase;Beta-galactosidase 8	BGAL8	A0A1P8AZB4_ARATH;BGAL8_ARATH;F4IIQ3_ARATH	BGAL8	carbohydrate metabolic process	beta-galactosidase activity;carbohydrate binding	apoplast;cell wall;vacuole	12	12	12	22.6	22.6	22.6	92.565	132.88	681680000	95	2.23183	0.0215928	-0.434336	-3.72092		Expressed in roots, flowers and siliques.{ECO:0000269|PubMed:16267099, ECO:0000269|PubMed:17466346}.	Secreted, extracellular space, apoplast{ECO:0000305}.	-0.374444	0.127986	-1.44651	-0.830593	-1.25271	-0.145172	0.988586	0.358704	1.12633	1.44783
AT2G31170	F4IPY2;F4IQQ3		SYCO ARATH	F4IQQ3_ARATH;SYCM_ARATH	SYCO	cristae formation;cysteinyl-tRNA aminoacylation;polar nucleus fusion;regulation of programmed cell death	ATP binding;cysteine-tRNA ligase activity;metal ion binding	chloroplast;chloroplast stroma;cytoplasm;mitochondrion	10	10	10	23.4	23.4	23.4	63.913	28.58	450420000	83	2.08899	0.0264543	0.373831	3.49427	Required for female gametophyte development. Isnecessary for the fusion of central cell nuclei and programmedcell death (PCD) of the antipodals.		Plastid, chloroplast{ECO:0000269|PubMed:10824085}. Mitochondrion{ECO:0000269|PubMed:10824085, ECO:0000269|PubMed:21135240}.	0.776739	0.263798	0.0508388	1.1715	1.42406	-1.59418	-1.31011	0.241842	-0.716033	-0.308451
AT2G43710	F4IS32;O22832	Acyl-[acyl-carrier-protein] desaturase;Acyl-[acyl-carrier-protein] desaturase 7, chloroplastic	SSI2;FAB2	F4IS32_ARATH;STAD7_ARATH	FAB2;SSI2	defense response;defense response to bacterium;defense response to insect;defense response to virus;fatty acid biosynthetic process;fatty acid metabolic process;lipid biosynthetic process;regulation of jasmonic acid mediated signaling pathway;regulation of salicylic acid mediated signaling pathway;unsaturated fatty acid biosynthetic process	acyl-[acyl-carrier-protein] desaturase activity;metal ion binding;stearoyl-[acp] desaturase activity;stearoyl-CoA 9-desaturase activity	chloroplast;chloroplast stroma;chloroplast thylakoid;plastid	14	14	11	45.6	45.6	34.9	45.65	168.8	1176200000	166	3.1085	0.00493793	0.750178	5.24459	Converts stearoyl-ACP to oleoyl-ACP by introduction of acis double bond between carbons 9 and 10 of the acyl chain.Required for the activation of certain jasmonic acid (JA)-mediatedresponses and the repression of the salicylic acid (SA) signalingpathway.;Introduction of a cis double bond between carbons of theacyl chain.	Ubiquitously expressed.{ECO:0000269|PubMed:17072561}.	Plastid, chloroplast stroma{ECO:0000269|PubMed:18431481}.	1.24686	0.548223	0.131521	0.956875	1.29149	-1.49649	-0.419528	-0.334099	-0.675821	-1.24903
AT2G32240	F4ISU2		At2g32240	F4ISU2_ARATH		response to abscisic acid;response to cadmium ion		integral component of membrane;plasma membrane	46	46	45	44.6	44.6	43.9	148.61	323.31	3243800000	467	2.68847	0.0108624	-0.210155	-4.48252				-0.704533	-1.63343	-0.703324	-0.340636	-0.629647	1.23239	0.359239	1.31527	1.20058	-0.0959119
AT2G44120	F4IT48;P60039	60S ribosomal protein L7-3	At2g44120;RPL7C	F4IT48_ARATH;RL73_ARATH	RPL7C	maturation of LSU-rRNA from tricistronic rRNA transcript (SSU-rRNA, 5.8S rRNA, LSU-rRNA)	mRNA binding;structural constituent of ribosome	chloroplast;cytosol;cytosolic large ribosomal subunit;cytosolic ribosome;membrane;nucleolus;plasmodesma;polysomal ribosome;vacuole	18	8	4	62.8	36.8	14.2	28.519	323.31	2724900000	121	2.50454	0.0143359	0.381115	4.16831				0.948977	1.55168	0.940751	-0.292993	0.776678	-1.00106	-1.0794	-1.1855	-0.734403	0.0752716
AT2G32810	F4IUQ7;Q9SCV3	Beta-galactosidase;Beta-galactosidase 9	BGAL9	BGAL9_ARATH;F4IUQ7_ARATH	BGAL9	carbohydrate metabolic process	beta-galactosidase activity;carbohydrate binding	apoplast;cell wall;integral component of membrane;plant-type cell wall;vacuolar membrane;vacuole	9	9	9	18.6	18.6	18.6	96.513	16.347	150400000	28	4.6184	0	-1.97244	-8.68425		Ubiquitous, with higher expression levels insiliques. {ECO:0000269|PubMed:16267099,ECO:0000269|PubMed:17466346}.	Secreted, extracellular space, apoplast{ECO:0000305}.	-0.961062	-0.455005	-0.733816	-1.57318	-0.787166	1.08587	1.07378	0.983084	0.720732	0.646762
AT2G26890	F4IVL6	DnaJ homolog subfamily C GRV2	GRV2	GRV2_ARATH	GRV2	amyloplast organization;cell division;embryo development ending in seed dormancy;embryonic axis specification;endocytosis;endosome organization;late endosome to vacuole transport;negative gravitropism;phototropism;protein targeting to vacuole;receptor-mediated endocytosis;response to starvation;vacuole organization		endoplasmic reticulum;endosome membrane;Golgi apparatus;intracellular membrane-bounded organelle;late endosome;late endosome membrane;trans-Golgi network;vacuolar membrane;vacuole	4	4	4	2.5	2.5	2.5	279.07	7.8851	24123000	12	2.0272	0.0288792	1.26043	3.39766	Required for endosome formation, vacuolar proteinsorting and determination of the embryo growth axis. Necessary forthe transport of proteins into protein storage vacuoles (PSVs).Participates in vesicle trafficking from the endosome to thecentral vacuole. Involved in the regulation of shoot phototropismand gravitropism, probably through the positioning of specializedamyloplasts (statoliths) in end…	Constitutively expressed in roots, hypocotyls,leaves (e.g. vascular tissues), stems, flowers (e.g. petals andstigmas), siliques and pollen. {ECO:0000269|PubMed:15466218,ECO:0000269|PubMed:17971043}.	Endosome membrane{ECO:0000269|PubMed:17259264, ECO:0000269|PubMed:17971043};Peripheral membrane protein {ECO:0000269|PubMed:17259264}.	1.3611	0.239525	1.01024	0.346193	0.688495	-1.59543	0.171593	-0.677934	0.0185205	-1.5623
AT2G45290	F4IW47	Transketolase-2, chloroplastic	TKL-2	TKTC2_ARATH	TKL-2	pentose-phosphate shunt;reductive pentose-phosphate cycle;response to cadmium ion	metal ion binding;transketolase activity	chloroplast;chloroplast stroma;chloroplast thylakoid membrane;cytosol;plastid	16	5	5	25.9	14.4	14.4	79.921	8.005	220660000	14	2.35073	0.0182857	1.79197	3.91345	Catalyzes the reversible transfer of a two-carbon ketolgroup from fructose-6-phosphate or sedoheptulose-7-phosphate toglyceraldehyde-3-phosphate to yield xylulose-5-phosphate anderythrose-4-phosphate or ribose-5-phosphate, respectively (Bysimilarity). Could act as a stress sensor involved in adaptationprocess.		Plastid, chloroplast thylakoid membrane.Plastid, chloroplast stroma {ECO:0000269|PubMed:18431481}.	1.31771	1.30732	0.836041	0.948441	-0.56508	-0.845277	-0.165823	-1.25075	-0.593719	-0.988871
AT3G55410	F4IWV2		At3g55410	F4IWV2_ARATH		tricarboxylic acid cycle	cobalt ion binding;oxoglutarate dehydrogenase (succinyl-transferring) activity;thiamine pyrophosphate binding;zinc ion binding	mitochondrion;oxoglutarate dehydrogenase complex	38	38	27	44.4	44.4	32.4	115.16	323.31	6759800000	557	3.61735	0.00265	-0.459426	-6.26654				-0.606184	-0.153328	-0.667858	-1.3737	-1.52236	0.750215	1.19049	0.880346	0.944439	0.557937
AT3G62030	F4IX28;F4IX26;P34791	Peptidyl-prolyl cis-trans isomerase;Peptidyl-prolyl cis-trans isomerase CYP20-3, chloroplastic	ROC4;CYP20-3	CP20C_ARATH;F4IX26_ARATH;F4IX28_ARATH	CYP20-3;ROC4	cysteine biosynthetic process;defense response to bacterium;protein folding;protein peptidyl-prolyl isomerization;protein refolding;response to abscisic acid;response to cytokinin;response to light intensity;response to mannitol;response to oxidative stress;response to salt stress;signal transduction	cyclosporin A binding;peptidyl-prolyl cis-trans isomerase activity;unfolded protein binding	apoplast;chloroplast;chloroplast envelope;chloroplast stroma;chloroplast thylakoid membrane;cytosolic ribosome;thylakoid;thylakoid lumen	15	15	15	57.1	57.1	57.1	28.079	197.97	33026000000	1117	3.54466	0.0029011	-0.294751	-6.11311	PPIases accelerate the folding of proteins. It catalyzesthe cis-trans isomerization of proline imidic peptide bonds inoligopeptides.;PPIases accelerate the folding of proteins. It catalyzesthe cis-trans isomerization of proline imidic peptide bonds inoligopeptides. Required for the light-induced increase of thiolaccumulation. Assists the folding or assembly of SAT1 enzyme toform the cysteine synt…	Ubiquitous, mostly expressed in leaves andflowers. {ECO:0000269|PubMed:15047905,ECO:0000269|PubMed:8132503}.	Plastid, chloroplast stroma{ECO:0000269|PubMed:11719511, ECO:0000269|PubMed:8132503}.Note=Probably associated to membranes.	-0.296393	-1.17781	-0.977155	-0.826323	-1.02728	0.263356	0.649017	0.560831	1.32242	1.50933
AT3G57240	F4J270		BG3	BG3_ARATH	BG3	carbohydrate metabolic process;response to bacterium	cellulase activity;glucan endo-1,3-beta-D-glucosidase activity	anchored component of plasma membrane;apoplast;cell wall;endoplasmic reticulum	4	4	4	15.8	15.8	15.8	37.631	4.7606	124350000	23	1.79687	0.0412816	-0.931521	-3.0441	May play a role in plant defense against pathogens		Endoplasmic reticulum{ECO:0000305|PubMed:23656331}. Secreted{ECO:0000250|UniProtKB:P33157}.	-0.555108	-1.27904	-1.23075	-0.812429	0.402385	0.743235	0.475107	-0.280964	0.70197	1.83559
AT3G02200	F4J2B4;Q8W4A0	Eukaryotic translation initiation factor 3 subunit M	At3g02200;F14P3.15	F4J2B4_ARATH;Q8W4A0_ARATH	F14P3.15	cytoplasmic translational initiation;formation of cytoplasmic translation initiation complex	translation initiation factor activity	cytosol;eukaryotic 43S preinitiation complex;eukaryotic 48S preinitiation complex;eukaryotic translation initiation factor 3 complex;eukaryotic translation initiation factor 3 complex, eIF3m;proteasome complex	9	9	9	46.4	46.4	46.4	41.156	217.52	579280000	90	1.99195	0.0304279	0.301141	3.34291	Component of the eukaryotic translation initiationfactor 3 (eIF-3) complex, which is involved in protein synthesisof a specialized repertoire of mRNAs and, together with otherinitiation factors, stimulates binding of mRNA and methionyl-tRNAito the 40S ribosome. The eIF-3 complex specifically targets andinitiates translation of a subset of mRNAs involved in cellproliferation.		Cytoplasm {ECO:0000256|HAMAP-Rule:MF_03012}.	1.83754	0.0345188	0.293497	0.90569	0.549915	-0.669132	-1.43406	-1.06587	0.353129	-0.805231
AT3G52200	F4J5T2;Q0WQF7	Dihydrolipoyllysine-residue acetyltransferase component 1 of pyruvate dehydrogenase complex, mitochondrial	LTA3	F4J5T2_ARATH;ODP21_ARATH	LTA3	glycolytic process	ATP binding;dihydrolipoyllysine-residue acetyltransferase activity;transferase activity, transferring acyl groups	mitochondrial matrix;mitochondrion;pyruvate dehydrogenase complex	13	13	13	36.3	36.3	36.3	77.893	129.18	1859900000	171	2.48639	0.0146816	-0.288166	-4.13787	The pyruvate dehydrogenase complex catalyzes the overallconversion of pyruvate to acetyl-CoA and CO(2). It containsmultiple copies of three enzymatic components: pyruvatedehydrogenase (E1), dihydrolipoamide acetyltransferase (E2) andlipoamide dehydrogenase (E3).		Mitochondrion matrix{ECO:0000269|PubMed:14671022}.	-1.19873	-0.243475	0.238951	-1.29325	-1.41949	0.98388	0.66933	0.920439	1.21664	0.125703
AT3G59780	F4J9G2		At3g59780	F4J9G2_ARATH				chloroplast;chloroplast thylakoid;nucleus	27	27	27	47.5	47.5	47.5	73.934	323.31	5499600000	399	5.28614	0	-0.442336	-10.6824				-1.38814	-1.20167	-0.538226	-0.810118	-0.64725	1.03569	0.901226	0.723442	0.923822	1.00123
AT3G48500	F4JF21;F4JF21-2		PDE312	PTA10_ARATH	PTAC10		nucleic acid binding	chloroplast;chloroplast stroma;cytosol;nucleoid;plastid chromosome	7	7	7	13.2	13.2	13.2	78.813	19.99	161700000	34	2.3141	0.0194305	0.444306	3.85374			Plastid, chloroplast {ECO:0000255}.	1.83309	0.727179	-0.352314	0.83599	0.780058	-0.735298	-0.344664	-0.428911	-1.437	-0.87813
AT3G48870	F4JF64;Q9SXJ7	Chaperone protein ClpC2, chloroplastic	HSP93-III;CLPC2	CLPC2_ARATH;F4JF64_ARATH	CLPC2;HSP93-III	chloroplast organization;protein hexamerization;protein import into chloroplast stroma;protein metabolic process	ATP binding;ATPase activity;protein homodimerization activity	chloroplast;chloroplast envelope;chloroplast membrane;chloroplast stroma;membrane;mitochondrion;plastid;plastid stroma	49	8	8	55.9	11.7	11.7	102.24	24.092	308310000	49	3.59816	0.00266667	1.22406	6.22577	Molecular chaperone (PubMed:15304652, PubMed:21737456,PubMed:24599948). May act as a suppressor of FtsH-mediatedthylakoid membrane biogenesis and may enhance photoinhibition(PubMed:15304652). Seems not involved in chloroplastic proteinimport (PubMed:15304652). Probable component of the TIC-associatedstromal import motor involved in inner membrane translocation(PubMed:17376159). Has an ATPase acti…	Expressed at low levels in roots andinflorescences (PubMed:15659100). Expressed at very low levels inrosette leaves (PubMed:15659100). Expressed in photosyntheticgreen tissues with high levels in young, developing leaf tissues(PubMed:23898032). {ECO:0000269|PubMed:15659100,ECO:0000269|PubMed:23898032}.	Plastid, chloroplast stroma{ECO:0000269|PubMed:10427773, ECO:0000269|PubMed:21737456,ECO:0000269|PubMed:24599948}. Plastid, chloroplast membrane{ECO:0000269|PubMed:21737456, ECO:0000269|PubMed:24599948}.	1.26375	0.978925	0.262109	0.604913	1.20893	-1.4467	-0.805254	-0.528998	-1.1842	-0.353475
AT3G07770	F4JFN3		Hsp89.1	HS906_ARATH	HSP90-6	protein folding	ATP binding;unfolded protein binding	cell wall;chloroplast stroma;endoplasmic reticulum;mitochondrion;perinuclear region of cytoplasm	24	18	18	34.4	29	29	90.566	129.23	2003900000	197	2.50485	0.0143908	0.47264	4.16881	Molecular chaperone which stabilizes unfolding proteinintermediates and functions as a folding molecular chaperone thatassists the non-covalent folding of proteins in an ATP-dependentmanner.		Mitochondrion {ECO:0000255}.	1.11465	1.69502	-0.095169	0.37946	0.831278	-0.817225	-0.966054	0.0627913	-1.05311	-1.15164
AT3G14110	F4JFR2;F4JFR1;Q940U6	Protein FLUORESCENT IN BLUE LIGHT, chloroplastic	FLU	F4JFR1_ARATH;F4JFR2_ARATH;FLU_ARATH	FLU	chlorophyll biosynthetic process;oxylipin biosynthetic process		chloroplast;chloroplast envelope;chloroplast membrane;chloroplast thylakoid;chloroplast thylakoid membrane;integral component of membrane;membrane	9	9	9	45.7	45.7	45.7	25.718	35.544	1145000000	89	1.70367	0.0481297	0.341609	2.90352	Negative regulator of tetrapyrrole biosynthesis(including chlorophyll) in chloroplasts, probably via HEMA1repression. Inhibits especially the magnesium ion Mg(2+) branch oftetrapyrrole biosynthesis, but independently of heme		Single-pass membrane protein.Plastid, chloroplast thylakoid membrane; Single-pass membraneprotein.;Plastid, chloroplast membrane{ECO:0000269|PubMed:18431481}	0.836598	0.128832	0.195216	1.77049	0.466616	-1.81356	-0.590779	-0.626301	-0.814183	0.447068
AT1G64230;AT3G08690;AT4G27960;AT5G41700;AT5G53300	F4JKF3;P35133;P35132;P35131;P35131-2;P35132-2;F4KJ37;F4I5C0;F4I5B8;P35131-3;Q94F47;P35134	Ubiquitin-conjugating enzyme E2 10;SUMO-conjugating enzyme UBC9;Ubiquitin-conjugating enzyme E2 8;Ubiquitin-conjugating enzyme E2 28;Ubiquitin-conjugating enzyme E2 11	UBC9;UBC10;UBC8;UBC28;UBC11	F4I5B8_ARATH;F4I5C0_ARATH;F4JKF3_ARATH;F4KJ37_ARATH;UBC10_ARATH;UBC11_ARATH;UBC28_ARATH;UBC8_ARATH;UBC9_ARATH	UBC10;UBC11;UBC28;UBC8;UBC9	endosperm development;protein sumoylation;ubiquitin-dependent protein catabolic process	ATP binding;transferase activity;ubiquitin conjugating enzyme activity;ubiquitin protein ligase binding;ubiquitin-protein transferase activity	cytoplasm;nucleus;plasma membrane	2	2	2	31.5	31.5	31.5	20.212	55.323	258860000	44	1.73067	0.0461697	1.10657	2.94412	Accepts the ubiquitin from the E1 complex and catalyzesits covalent attachment to other proteins.;Accepts the ubiquitin from the E1 complex and catalyzesits covalent attachment to other proteins. Mediates the selectivedegradation of short-lived and abnormal proteins;Accepts the ubiquitin-like protein SUMO/SMT3 from the E1complex and catalyzes its covalent attachment to other proteins.Mediates the…	Expressed in seeds, pistils, siliques,hypocotyls and leaves. {ECO:0000269|PubMed:16339806}.;Highest expression in young stems and oldleaves. Lowest levels in floral buds, anthers and young leaves.{ECO:0000269|PubMed:16339806}.;Highest expression in young stems, old leaves.Lowest levels in floral buds, anthers and young leaves.{ECO:0000269|PubMed:16339806}.;Ubiquitously expressed with the highest …		-0.506259	1.01547	2.21702	0.252565	0.441846	-0.901342	-0.674746	-0.653733	-0.336308	-0.854506
AT4G28080	F4JKH6		At4g28080	TSS_ARATH	TSS	cell cycle;multicellular organism development;response to abscisic acid		cytoplasm	23	23	18	18.3	18.3	15	199.11	120.7	1314200000	176	2.25542	0.0207654	0.768042	3.75882	Negatively regulates meristematic tissue proliferationby integrating developmental signals with carbon sourceavailability. May act as the scaffold of a protein complex, whichsequesters key factors that are required for the G2 to Mtransition in meristematic tissues.	Expressed in the non-epidermal tissues of thetrue leaves. Not detected in the vegetative shoot meristem andleaf primordia. {ECO:0000269|PubMed:21185286}.		1.18269	0.433373	0.307304	0.714558	1.1523	-0.145268	-0.592028	0.0669481	-1.21517	-1.9047
AT4G10000	F4JKW0		At4g10000	F4JKW0_ARATH		cell redox homeostasis	electron transfer activity;protein disulfide oxidoreductase activity	chloroplast	8	8	8	42.6	42.6	42.6	37.056	192.17	710570000	100	3.28901	0.00341379	-0.555734	-5.59366				-0.718094	-0.208313	-1.32129	-0.774812	-1.21052	0.812062	0.490022	0.241907	1.17737	1.51167
AT4G10320	F4JLM5;F4J2W0		At4g10320	SYIC_ARATH		isoleucyl-tRNA aminoacylation;response to cadmium ion	aminoacyl-tRNA editing activity;ATP binding;isoleucine-tRNA ligase activity;tRNA binding	cytosol	25	25	25	29.2	29.2	29.2	135.48	182.67	1564300000	315	1.87546	0.0367257	0.24228	3.16367			Cytoplasm, cytosol{ECO:0000305|PubMed:16251277, ECO:0000305|PubMed:16297076}.	1.10677	1.09854	0.708121	1.28392	-0.661131	-0.567915	-1.58133	0.0470689	-0.969686	-0.464365
AT4G16155	F4JLP5	Dihydrolipoyl dehydrogenase 2, chloroplastic	LPD2	PLPD2_ARATH	LPD2	cell redox homeostasis;response to arsenic-containing substance	dihydrolipoyl dehydrogenase activity;electron transfer activity;flavin adenine dinucleotide binding	chloroplast;chloroplast envelope;chloroplast stroma	21	21	13	53.4	53.4	37.6	60.144	212	2704600000	236	2.367	0.0179377	0.642283	3.94008	Lipoamide dehydrogenase is a component of the plastidialpyruvate dehydrogenase complex (PDC)	Expressed mainly in flower buds and immaturesiliques, and to a lesser extent in flowers.{ECO:0000269|PubMed:11056213}.	Plastid, chloroplast stroma {ECO:0000250}.	0.781582	-0.0331643	0.34529	1.59643	1.16321	-0.641052	-0.015043	-0.49101	-1.19035	-1.5159
AT4G22690;AT4G22710	F4JLY4;O49652		CYP706A1;T12H17.100	F4JLY4_ARATH;O49652_ARATH	CYP706A1;''cytochrome		heme binding;iron ion binding;oxidoreductase activity, acting on paired donors, with incorporation or reduction of molecular oxygen, NAD(P)H as one donor, and incorporation of one atom of oxygen	cell wall;Golgi apparatus;integral component of membrane;membrane;mitochondrion;plasma membrane;plasmodesma;vacuolar membrane	25	25	24	63.2	63.2	61	63.116	312.19	4971900000	431	3.48233	0.00317526	-0.660653	-5.9836				-1.25831	0.0165866	-0.719906	-1.53694	-0.789878	0.945099	0.62961	1.17494	0.939676	0.599118
AT4G17100	F4JNE1		At4g17100	F4JNE1_ARATH			endoribonuclease activity		6	6	6	33.8	33.8	33.8	35.951	18.09	462810000	35	2.04188	0.0282759	-0.855077	-3.42055				-0.131295	-0.0953813	-0.871934	-0.521193	-2.03574	0.432983	1.45913	0.497136	1.09795	0.168346
AT4G24190	F4JQ55;Q9STX5	Endoplasmin homolog	SHD	ENPL_ARATH;F4JQ55_ARATH	HSP90-7;SHD	protein folding;protein secretion;regulation of meristem growth;regulation of meristem structural organization;response to cadmium ion;response to cold;response to endoplasmic reticulum stress;response to salt stress;response to water deprivation	ATP binding;ATPase activity;unfolded protein binding	apoplast;chloroplast;endoplasmic reticulum;endoplasmic reticulum lumen;membrane;mitochondrion;nucleus;plasma membrane;plasmodesma;vacuolar membrane;vacuole	45	45	43	55.2	55.2	52.6	94.148	323.31	10358000000	670	3.91025	0.00189091	-0.399677	-6.9126	May have a molecular chaperone role in the processing ofsecreted materials. Required for shoot apical meristem (SAM), rootapical meristem (RAM) and floral meristem (FM) formation, probablyby regulating the folding of CLAVATA proteins (CLVs). Alsoinvolved in pollen tube elongation (PubMed:11867518). Involved inresistance to tunicamycin- or high calcium-induced ER stresses.Possesses ATPase activity…	Ubiquitous. {ECO:0000269|PubMed:11867518}.	Endoplasmic reticulum lumen {ECO:0000250}.	-1.07071	-0.317352	-0.543159	-0.963204	-1.4957	1.13324	0.602744	1.28112	0.861921	0.511106
AT4G30720	F4JQE2		At4g30720	F4JQE2_ARATH	PDE327	photosynthesis		chloroplast	7	7	7	15.7	15.7	15.7	77.089	53.705	232160000	77	3.18906	0.00403008	0.629558	5.39865				0.910614	1.32378	0.335807	0.931816	0.699672	-1.67417	-0.775017	-0.811322	0.000129843	-0.941307
AT4G36945	F4JQJ7		At4g36945	F4JQJ7_ARATH		lipid metabolic process	phosphoric diester hydrolase activity	plasma membrane	5	5	5	14	14	14	44.331	21.233	173790000	21	1.88841	0.0362132	-1.00367	-3.18347				-1.8525	-0.461483	-0.371581	-0.157209	-0.703228	0.935942	-0.28536	0.171093	1.37377	1.35056
AT4G25050	F4JRT7;Q9SW21	Acyl carrier protein;Acyl carrier protein 4, chloroplastic	ACP4	ACP4_ARATH;F4JRT7_ARATH	ACP4	cuticle development;fatty acid biosynthetic process;response to cytokinin;response to light stimulus;systemic acquired resistance	acyl carrier activity	chloroplast;chloroplast envelope;chloroplast stroma	3	3	3	34.2	34.2	34.2	15.938	78.221	537090000	85	1.83471	0.0388089	0.577973	3.10154	Carrier of the growing fatty acid chain in fatty acidbiosynthesis that plays a major role in the biosynthesis of fattyacids in leaves. Required for the biosynthesis of chloroplastphotosynthetic membrane lipids such asmonogalactosyldiacylglycerol, digalactosyldiacylglycerol andphosphatidylglycerol. Is essential for the biosynthesis of thecuticular wax and cutin polymers in leaves, and for theestab…		Plastid, chloroplast {ECO:0000305}.	0.0258002	1.07263	-0.255409	1.41422	1.24763	-1.86775	-0.316964	-0.250537	-0.574943	-0.494673
AT4G19880	Q8H121;F4JU03;F4JU04;B3H4D0;A0A1P8BFA4;Q9FL95;Q9FL98		At4g19880	F4JU03_ARATH;F4JU04_ARATH;Q8H121_ARATH		response to cadmium ion	glutathione transferase activity	cytoplasm;cytosol	12	12	12	43.3	43.3	43.3	40.575	183.43	1297300000	135	2.97191	0.00613018	0.773773	4.98944				0.589516	1.23349	0.696763	1.43295	0.173774	-1.2319	-0.424303	-1.11832	-0.0844715	-1.2675
AT4G39040	F4JV86;Q9SVI9		At4g39040;F19H22.140	F4JV86_ARATH;Q9SVI9_ARATH	CFM4		RNA binding	chloroplast	2	2	2	17.5	17.5	17.5	31.562	25.673	93320000	21	1.88007	0.0364407	0.986203	3.17071				0.464168	0.144496	1.37368	1.23565	0.321726	-0.130727	-0.561864	-1.81303	-1.2559	0.221803
AT5G59880	F4JXD5;Q9ZSK4;Q9ZSK3;Q39250	Actin-depolymerizing factor 3	ADF3	ADF3_ARATH;F4JXD5_ARATH	ADF3	actin filament depolymerization;response to cadmium ion;response to oxidative stress	actin binding	actin cytoskeleton;chloroplast;cytosol;mitochondrion;plasma membrane;plasmodesma	7	7	5	79.8	79.8	66.9	14.124	94.417	3415200000	183	2.153	0.0233115	-0.315088	-3.59524	Actin-depolymerizing protein. Severs actin filaments (F-actin) and binds to actin monomers		Cytoplasm, cytoskeleton{ECO:0000250|UniProtKB:Q39250}.	-0.619954	-1.8721	-0.277611	-1.29227	0.333904	0.85451	0.496902	1.00201	1.09136	0.283245
AT5G41970	F4K000;A0A1I9LPM9;Q9SG17		At5g41970	F4K000_ARATH	MJC20.7		hydrolase activity	cytosol;mitochondrion;nucleus	8	8	8	27.9	27.9	27.9	42.299	8.9552	394700000	40	1.93971	0.0338288	0.554369	3.26221				0.345728	1.00886	0.869201	-0.138336	1.49845	-1.75713	0.28073	-0.838227	-0.344644	-0.924641
AT5G60600	F4K0E8;B3H725;F4K0E8-2	4-hydroxy-3-methylbut-2-en-1-yl diphosphate synthase (ferredoxin), chloroplastic	ISPG;HDS	B3H725_ARATH;ISPG_ARATH	HDS;ISPG	isopentenyl diphosphate biosynthetic process, methylerythritol 4-phosphate pathway;response to bacterium;systemic acquired resistance, salicylic acid mediated signaling pathway;terpenoid biosynthetic process	4 iron, 4 sulfur cluster binding;4-hydroxy-3-methylbut-2-en-1-yl diphosphate synthase activity;iron ion binding	chloroplast;chloroplast envelope;chloroplast stroma	32	32	32	53.4	53.4	53.4	82.256	207.18	4527800000	504	2.27957	0.0199746	0.537012	3.79778	Enzyme of the plastid non-mevalonate pathway forisoprenoid biosynthesis that converts 2-C-methyl-D-erythritol 2,4-cyclodiphosphate (ME-2,4cPP) into 1-hydroxy-2-methyl-2-(E)-butenyl4-diphosphate. Is essential for chloroplast development andrequired for the salicylic acid (SA)-mediated disease resistanceto biotrophic pathogens.	Expressed in roots, shoots, leaves, flowersand siliques (at protein level). {ECO:0000269|PubMed:15133149}.	Plastid, chloroplast stroma{ECO:0000305|PubMed:11943178, ECO:0000305|PubMed:18236010}.	1.04491	-0.123543	0.0967999	0.679686	2.10643	-0.804639	-0.57166	-0.920967	-0.868702	-0.638317
AT5G35970	F4K1G7		At5g35970	F4K1G7_ARATH	MEE13.8		hydrolase activity	chloroplast;chloroplast envelope;chloroplast stroma	23	23	23	38.2	38.2	38.2	105.05	76.329	1367800000	207	1.95676	0.0329585	0.456458	3.28848				0.967647	1.26507	-0.304808	1.56884	0.0994563	-0.281245	-1.25321	-1.32749	-0.697092	-0.0371697
AT5G13650	F4K410;F4K409		At5g13650	F4K409_ARATH;SVR3_ARATH	SVR3	chloroplast RNA processing;protein stabilization;regulation of gene expression;response to cold;response to reactive oxygen species;rRNA processing;translation	GTP binding;GTPase activity;translation elongation factor activity	chloroplast;chloroplast stroma;cytosol;ribonucleoprotein complex	16	16	16	35.7	35.7	35.7	74.314	78.205	962410000	149	1.90889	0.035607	1.07998	3.21484	Putative chloroplastic elongation factor involved inresponse to chilling stress. Required for proper chloroplast rRNAprocessing and/or translation at low temperature(PubMed:21187014). Involved in plastid protein homeostasis(PubMed:21208309).		Plastid, chloroplast{ECO:0000269|PubMed:21187014}.	1.51122	0.106652	-0.213304	1.11547	1.04125	-0.117018	-0.848601	-0.401687	-0.379751	-1.81424
AT5G20140	Q8VZ90;F4K452		At5g20140	F4K452_ARATH;Q8VZ90_ARATH	HBP5	response to oxidative stress	heme binding	chloroplast;chloroplast envelope;chloroplast thylakoid;chloroplast thylakoid membrane	8	8	8	33.9	33.9	33.9	43.159	28.848	480560000	55	1.87991	0.036389	0.686835	3.17048				1.59071	0.972077	0.0306964	0.819723	0.126397	-2.01903	-0.507611	-0.0188483	-0.557156	-0.436956
AT5G20250	F4K470;Q8RX87	Probable galactinol--sucrose galactosyltransferase 6	DIN10;RFS6	F4K470_ARATH;RFS6_ARATH	DIN10;RFS6	raffinose family oligosaccharide biosynthetic process;response to cold;response to karrikin;response to oxidative stress	catalytic activity;galactinol-sucrose galactosyltransferase activity;mRNA binding	chloroplast;plasmodesma	9	9	9	14.2	14.2	14.2	94.215	14.81	255780000	53	3.0658	0.00508609	2.86843	5.16402	Transglycosidase operating by a ping-pong reactionmechanism. Involved in the synthesis of raffinose, a major solublecarbohydrate in seeds, roots and tubers (By similarity)			1.08984	0.325716	0.282902	1.17485	1.28695	-0.379167	-1.05714	-1.56645	-0.898602	-0.258893
AT5G09660	F4KDZ4;Q9ZP05;A0A1P8BBQ0;A8MRP1;B3H560	Malate dehydrogenase;Malate dehydrogenase, glyoxysomal	PMDH2	A0A1P8BBQ0_ARATH;A8MRP1_ARATH;B3H560_ARATH;F4KDZ4_ARATH;MDHX2_ARATH	PMDH2	carbohydrate metabolic process;glyoxylate cycle;malate metabolic process;regulation of fatty acid beta-oxidation;regulation of photorespiration;response to cytokinin;tricarboxylic acid cycle	L-malate dehydrogenase activity;malate dehydrogenase activity	apoplast;chloroplast;chloroplast envelope;microbody;peroxisome;vacuole	18	18	17	82	82	78.4	34.975	323.31	42538000000	505	1.91701	0.0352759	0.354705	3.22731	Catalyzes a reversible NAD-dependent dehydrogenasereaction involved in central metabolism and redox homeostasisbetween organelle compartments (Probable). Peroxisomal NAD-dependent malate dehydrogenase involved in fatty acid beta-oxidation. Reoxidizes NADH from the beta-oxidation and providesNAD for the conversion of fatty acyl-CoA to acetyl-CoA. Does notparticipate directly in the glyoxylate cycl…	Expressed in rosette leaves.{ECO:0000269|PubMed:20876337}.	Peroxisome {ECO:0000269|PubMed:17376163}.	0.786932	-0.401431	0.174063	1.04835	1.95939	-1.01974	-1.03559	-0.478575	-0.0832568	-0.950139
AT5G16715	F4KE63		EMB2247	SYVM2_ARATH	EMB2247	embryo development ending in seed dormancy;valyl-tRNA aminoacylation	aminoacyl-tRNA editing activity;ATP binding;valine-tRNA ligase activity	chloroplast;chloroplast stroma;cytosol;mitochondrion	19	19	19	26.6	26.6	26.6	110.63	52.049	967320000	140	3.06575	0.00505263	0.677186	5.16393			Plastid, chloroplast{ECO:0000269|PubMed:16251277}. Mitochondrion{ECO:0000269|PubMed:16251277}.	1.2985	0.0968774	0.644401	1.23549	0.884979	-0.905277	-1.00559	-0.0640904	-0.670109	-1.51517
AT5G40450	F4KHD5		At5g40450	F4KHD5_ARATH	MPO12.160	lytic vacuole organization	kinase activity	chloroplast;cytosol;plasma membrane	42	42	42	27.3	27.3	27.3	323	276.74	3651100000	430	2.1133	0.0249019	-0.160323	-3.53251				0.123229	-0.560694	-2.00875	-0.923077	-0.33346	0.795663	0.294395	1.18721	1.22601	0.199473
AT5G25100	F4KIM7;Q9C5N2	Transmembrane 9 superfamily member 9	At5g25100;TMN9	F4KIM7_ARATH;TMN9_ARATH	TMN9	protein localization to membrane		endosome;endosome membrane;Golgi apparatus;Golgi membrane;integral component of membrane;membrane;plasma membrane;plasmodesma;trans-Golgi network	9	9	3	15.4	15.4	6.3	74.835	28.906	734910000	110	1.76285	0.0438185	0.471633	2.99264			Multi-pass membrane protein{ECO:0000255}.; Multi-pass membrane protein{ECO:0000255}. Golgi apparatus membrane{ECO:0000250|UniProtKB:Q940G0}; Multi-pass membrane protein{ECO:0000256|RuleBase:RU363079}.; Multi-pass membrane protein{ECO:0000256|RuleBase:RU363079}. Golgi apparatus membrane{ECO:0000256|RuleBase:RU363079};Endosome membrane{ECO:0000250|UniProtKB:P32802};Endosome membrane{ECO:0000256|Rul…	0.693897	0.326643	0.0292299	1.3923	1.00528	-1.27571	-1.0836	0.853539	-0.817737	-1.12384
AT4G18930	O04147	Cyclic phosphodiesterase		CPD_ARATH		cyclic nucleotide metabolic process;tRNA splicing, via endonucleolytic cleavage and ligation	2',3'-cyclic-nucleotide 3'-phosphodiesterase activity	cytoplasm	2	2	2	16.6	16.6	16.6	20.514	51.283	207930000	49	1.94252	0.0336689	-0.885832	-3.26655	Hydrolyzes ADP-ribose 1",2"-cyclic phosphate (Appr>1)that is produced during tRNA splicing into ADP-ribose 1"-phosphate(Appr-1"p). Acts also on nucleoside 2',3'-cyclic phosphates.	Expressed in leaves, stems, roots, floral budsand germinating seeds. {ECO:0000269|PubMed:9148938}.	Cytoplasm {ECO:0000269|PubMed:9148938}.	0.373026	-1.06238	0.204185	-1.41345	-1.68733	0.848331	0.728511	0.85713	0.262147	0.889831
AT3G16470	O04309;A0A1I9LQM9;O04309-2	Jacalin-related lectin 35	JAL35	A0A1I9LQM9_ARATH;JAL35_ARATH	JAL35;JR1	response to cold;response to jasmonic acid;response to salt stress;response to wounding;vegetative to reproductive phase transition of meristem	carbohydrate binding	chloroplast;membrane;nucleus;plasmodesma;vacuole	21	21	21	70.5	70.5	70.5	48.496	323.31	4822400000	327	3.63755	0.00294444	-0.974367	-6.30963				-1.41168	-0.219782	-0.524637	-1.20222	-0.970103	0.81436	0.891918	0.517646	1.4742	0.630299
AT4G01310	O04603	50S ribosomal protein L5, chloroplastic	RPL5	RK5_ARATH	RPL5	response to cytokinin;ribosomal large subunit assembly;translation	rRNA binding;structural constituent of ribosome	chloroplast;chloroplast envelope;chloroplast stroma;cytosolic ribosome;membrane	22	22	22	71.4	71.4	71.4	28.343	170.41	5139900000	374	4.21293	0.00180645	0.453251	7.63104	Binds 5S rRNA, forms part of the central protuberance ofthe 50S subunit.		Plastid, chloroplast.	1.50457	0.748573	0.599169	0.85186	0.743557	-0.547358	-1.51066	-0.80341	-0.955952	-0.630348
AT5G26830	O04630-2;O04630	Threonine--tRNA ligase, mitochondrial	THRRS	SYTM1_ARATH	THRRS	threonyl-tRNA aminoacylation	ATP binding;metal ion binding;threonine-tRNA ligase activity	cell wall;chloroplast;cytoplasm;cytosol;membrane;mitochondrion;plasma membrane	19	19	19	33.9	33.9	33.9	77.336	205.42	1743100000	231	3.25424	0.00380165	0.275906	5.52534			Mitochondrion {ECO:0000269|PubMed:10583378}.Cytoplasm, cytosol {ECO:0000269|PubMed:10583378}.	0.214462	0.882862	0.931959	1.14588	1.04719	-0.699607	-1.08997	-0.780146	-1.61519	-0.03743
AT2G23350	O22173;O64380	Polyadenylate-binding protein 4	PAB4	PABP4_ARATH	PAB4	regulation of translation;response to cadmium ion;viral process	mRNA 3'-UTR binding;mRNA binding;poly(A) binding;poly(U) RNA binding;RNA binding	cytoplasm;cytosol;nucleus;ribonucleoprotein complex	19	18	17	35.8	34.7	33.4	71.652	34.809	2226300000	234	2.66175	0.0111542	0.373863	4.43619	Binds the poly(A) tail of mRNA. Appears to be animportant mediator of the multiple roles of the poly(A) tail inmRNA biogenesis, stability and translation (By similarity). Duringinfection with potyvirus TuMV, acts as a potential integralcomponent of the viral replicase complex that could play animportant role in the regulation of potyviral RNA-dependent RNApolymerase (RdRp) (By similarity).		Cytoplasm {ECO:0000250}. Nucleus{ECO:0000250}.	1.12589	0.251544	0.0548471	1.33801	1.22934	-0.790983	-0.197702	-0.346006	-1.21182	-1.45313
AT3G27925	O22609	Protease Do-like 1, chloroplastic	DEGP1	DEGP1_ARATH	DEGP1	photosystem II repair;protein catabolic process;response to cytokinin	identical protein binding;serine-type endopeptidase activity;serine-type peptidase activity	chloroplast;chloroplast thylakoid;chloroplast thylakoid membrane;nucleus;thylakoid;thylakoid lumen	16	16	16	48.7	48.7	48.7	46.673	159.46	5735200000	276	2.4699	0.0153309	-0.324828	-4.1103	Serine protease that is required at high temperature.May be involved in the degradation of damaged proteins. In vivo,can degrade beta-casein.		Lumenalside {ECO:0000269|PubMed:11719511, ECO:0000269|PubMed:9507020}.; Peripheral membrane protein{ECO:0000269|PubMed:11719511, ECO:0000269|PubMed:9507020};Plastid, chloroplast thylakoid membrane{ECO:0000269|PubMed:11719511, ECO:0000269|PubMed:21877139,ECO:0000269|PubMed:9507020}	-0.625421	-0.150652	-0.374907	-0.975479	-1.78116	0.172203	0.420092	0.944239	1.63983	0.731254
AT2G33380	O22788;O22788-2	Probable peroxygenase 3	PXG3	PXG3_ARATH	PXG3	(R)-2-hydroxy-alpha-linolenic acid biosynthetic process;defense response to fungus;oxylipin metabolic process;regulation of reactive oxygen species metabolic process;response to abscisic acid;response to cold;response to desiccation;response to fungus;response to salicylic acid;response to salt stress;stomatal movement	calcium ion binding;monooxygenase activity;plant seed peroxidase activity	chloroplast membrane;endoplasmic reticulum;intracellular membrane-bounded organelle;monolayer-surrounded lipid storage body;vacuole	4	4	4	27.1	27.1	27.1	26.6	12.788	371070000	43	2.32708	0.0189396	-1.66391	-3.87486	Probable calcium-binding peroxygenase. May be involvedin the degradation of storage lipid in oil bodies, in abioticstress-related signaling pathway and in drought tolerance throughstomatal control under water deficit conditions	Expressed in cotyledons, hypocotyls, leaves,shoots, flowers, stems, siliques, hydatodes, trichome bases andguard cells. Not detected in roots, mature brown siliques ormature dry seeds. {ECO:0000269|PubMed:10965948,ECO:0000269|PubMed:11197322, ECO:0000269|PubMed:19467604,ECO:0000269|PubMed:20952421}.	Microsome membrane. Plastid, chloroplastmembrane. Lipid droplet.	-1.95875	-0.130186	-0.0696173	-1.0477	-0.625048	0.22827	0.888142	0.486724	0.898461	1.3297
AT2G33410	O22791		At2g33410	O22791_ARATH			mRNA binding;RNA binding	ribonucleoprotein complex	2	2	2	5.9	5.9	5.9	41.328	3.8972	151940000	28	1.84801	0.0380041	1.00364	3.12178				0.358768	1.05424	0.74015	0.598482	0.763558	-0.361134	-1.77473	0.102649	0.229085	-1.71107
AT2G43820	O22822	UDP-glycosyltransferase 74F2	UGT74F2	U74F2_ARATH	UGT74F2	benzoate metabolic process;para-aminobenzoic acid metabolic process;positive regulation of seed germination;salicylic acid metabolic process	benzoic acid glucosyltransferase activity;nicotinate-O-glucosyltransferase activity;quercetin 3-O-glucosyltransferase activity;quercetin 7-O-glucosyltransferase activity;salicylic acid glucosyltransferase (ester-forming) activity;salicylic acid glucosyltransferase (glucoside-forming) activity;UDP-glucose:4-aminobenzoate acylglucosyltransferase activity;UDP-glucosyltransferase activity;UDP-glycosy…	cytosol;intracellular membrane-bounded organelle	6	6	6	18.3	18.3	18.3	50.771	229.62	310100000	37	1.85375	0.0378025	1.59053	3.13053	Glycosyltransferase that glucosylates benzoic acid andderivatives. Substrate preference is benzoic acid > salicylic acid(SA) > 3-hydroxybenzoic acid > 4-hydroxybenzoic acid. Catalyzesthe formation of both SA 2-O-beta-D-glucoside (SAG) and SA glucoseester (SGE). Has high affinity for the tryptophan precursoranthranilate. Catalyzes the formation of anthranilate glucoseester. Is the major source of …	Expressed in seedlings.{ECO:0000269|PubMed:12475971}.		0.328975	0.772936	0.855045	0.734048	0.828624	-2.43493	-0.454254	-0.42071	-0.0626618	-0.147069
AT2G43460;AT3G59540	O22860	60S ribosomal protein L38	RPL38A	RL38_ARATH	RPL38A;RPL38B	translation	structural constituent of ribosome	cytosolic large ribosomal subunit;cytosolic ribosome	3	3	3	56.5	56.5	56.5	8.1216	4.3176	200070000	19	2.17177	0.0229192	1.9224	3.62503				0.500087	0.488108	0.590986	1.10942	1.05114	-1.17921	0.187117	-1.8452	-0.993979	0.0915321
AT2G40490	O22886	Uroporphyrinogen decarboxylase 2, chloroplastic	HEME2	DCUP2_ARATH	HEME2	chlorophyll biosynthetic process;heme biosynthetic process;protoporphyrinogen IX biosynthetic process;response to cytokinin	uroporphyrinogen decarboxylase activity	chloroplast;chloroplast envelope;chloroplast stroma;cytosol	23	23	23	63.2	63.2	63.2	43.579	171.43	7745200000	438	3.30203	0.00322807	0.465145	5.61939	Catalyzes the decarboxylation of four acetate groups ofuroporphyrinogen-III to yield coproporphyrinogen-III		Plastid, chloroplast {ECO:0000305}.	1.07081	0.468576	0.19199	1.24485	1.26075	-0.217742	-0.778121	-0.724505	-1.49637	-1.02024
AT2G47400	O22914	Calvin cycle protein CP12-1, chloroplastic	CP12-1	CP121_ARATH	CP12-1	negative regulation of reductive pentose-phosphate cycle;reductive pentose-phosphate cycle;response to sucrose	copper ion binding;nickel cation binding	chloroplast;chloroplast envelope;chloroplast stroma;protein-containing complex	2	2	2	34.7	34.7	34.7	13.487	60.036	176450000	28	1.9439	0.0336909	1.71305	3.26867	Acts as a linker essential in the assembly of a corecomplex of PRK/GAPDH. Coordinates the reversible inactivation ofchloroplast enzymes GAPDH and PRK during darkness inphotosynthetic tissues.	Mostly expressed in flowers, hypocotyl,cotyledons, leaves, stems, and flower stalks. Barely detectable inroots and siliques. Present in root tips and lateral roots.Accumulates in the cotyledons of etiolated seedlings.{ECO:0000269|PubMed:15533878, ECO:0000269|PubMed:18974062}.	Plastid, chloroplast{ECO:0000269|PubMed:18431481, ECO:0000269|PubMed:20399532}.	0.384728	0.73824	0.998107	0.763807	0.702064	-0.352413	-2.21104	-1.09844	-0.0405918	0.115542
AT2G41790	O22941	Zinc-metallopeptidase, peroxisomal	PXM16	IDE1_ARATH	PXM16	proteolysis involved in cellular protein catabolic process	metal ion binding;metalloendopeptidase activity	mitochondrion;peroxisome	17	17	16	20.5	20.5	19.7	110.99	39.72	819140000	159	1.93716	0.0337937	0.394939	3.25828	Peptidase that might be involved in pathogen or woundresponse. Not required for peroxisome biogenesis, indole-3-butyricacid (IBA) metabolism, fatty acid beta-oxidation or degradation ofglyoxylate cycle enzymes during seedling development		Peroxisome {ECO:0000269|PubMed:15333753}.	0.772626	1.42482	0.558057	0.799613	0.0269429	-2.00482	-0.183709	-0.0415284	-0.200241	-1.15175
AT1G05190	O23049	50S ribosomal protein L6, chloroplastic	RPL6	RK6_ARATH	RPL6	embryo development ending in seed dormancy;response to cytokinin;translation	rRNA binding;structural constituent of ribosome	chloroplast;chloroplast envelope;chloroplast stroma;membrane;ribosome	16	16	16	60.5	60.5	60.5	24.705	117.4	3795200000	190	1.72482	0.0463706	0.312032	2.93531	This protein binds directly to 23S ribosomal RNA and islocated at the aminoacyl-tRNA binding site of thepeptidyltransferase center.		Plastid, chloroplast {ECO:0000250}.	-0.190105	0.367076	0.0524192	1.11523	2.07109	-0.805555	0.0108446	-1.3557	-0.579066	-0.686235
AT4G14030	O23264	Selenium-binding protein 1	SBP1	SEBP1_ARATH	SBP1	cellular response to selenium ion;response to cadmium ion;response to hydrogen peroxide;sulfate assimilation	selenium binding	cytosol;plasmodesma	16	11	11	57.8	46.1	46.1	54.056	224.95	1473000000	157	2.18126	0.0228475	0.176036	3.64012	Binds cadmium and mediates lower sensitivity to stressrequiring glutathione (GSH) for tolerance (e.g. cadmium, selenate,and hydrogen peroxide excess). Probably helps to detoxify cadmiumpotentially through direct binding.	Expressed in seedlings, roots, leaves, stemsand flowers. {ECO:0000269|PubMed:18354042}.		1.42364	1.60166	0.541337	-0.0916054	0.270579	-1.03547	-1.59163	-0.336439	-0.324702	-0.457378
AT4G15110	O23365	Cytochrome P450 97B3, chloroplastic	CYP97B3	C97B3_ARATH	CYP97B3	carotenoid biosynthetic process	heme binding;iron ion binding;monooxygenase activity;oxidoreductase activity, acting on paired donors, with incorporation or reduction of molecular oxygen	chloroplast;chloroplast envelope;chloroplast membrane;chloroplast stroma	15	15	15	33.1	33.1	33.1	65.174	124.53	2387700000	247	3.14361	0.00466187	-0.257453	-5.3114	Heme-containing cytochrome P450 probably involved in thebiosynthesis of xanthophylls. Hydroxylates beta-rings of alpha-carotene. May also have activity on beta-rings of beta-carotene		Plastid, chloroplast membrane{ECO:0000269|PubMed:18431481}.	-1.02813	-0.937586	-0.969187	0.0771217	-1.329	0.404311	1.2094	1.35198	0.887012	0.334074
AT4G15530	O23404-3;O23404;O23404-4;O23404-2	Pyruvate, phosphate dikinase 1, chloroplastic	PPDK	PPDK1_ARATH	PPDK	photosynthesis;pyruvate metabolic process	ATP binding;kinase activity;metal ion binding;pyruvate, phosphate dikinase activity	chloroplast;chloroplast stroma;cytosol;nucleus	32	32	31	45.4	45.4	44.7	104.2	121.31	5629300000	432	2.90644	0.00743182	-0.417858	-4.86974	Formation of phosphoenolpyruvate. May be involved inregulating the flux of carbon into starch and fatty acids of seedsand in the remobilization of nitrogen reserves in senescingleaves.	Isoform 1 is expressed in leaves, flowers andsiliques. Isoform 2 is found in cotyledons, rosette and caulineleaves, petioles, flowers and siliques.{ECO:0000269|PubMed:16915520}.	Plastid, chloroplast{ECO:0000269|PubMed:16915520}. Cytoplasm{ECO:0000269|PubMed:16915520}. Note=Isoform 1 is targeted to thechloroplast while isoform 2 is found in the cytoplasm.	-0.463331	-0.517118	-0.372751	-0.702744	-2.0458	0.69886	0.707644	0.699384	1.33688	0.65898
AT4G16130	O23461;Q9M1M0;A0A1I9LRU1	L-arabinokinase	ARA1	ARAK_ARATH	ARA1		ATP binding;galactose binding;L-arabinokinase activity	cytoplasm;cytosol;integral component of membrane;plasmodesma	12	12	12	16.7	16.7	16.7	114.26	30.28	348490000	80	2.01475	0.029305	0.235609	3.37829	Arabinose kinase. Involved in the salvage pathway whichconverts free L-arabinose to UDP-L-arabinose. May play a role inarabinose transport.		Single-pass membraneprotein {ECO:0000305}.;Membrane {ECO:0000305}	0.41743	1.55829	0.929549	0.0522425	0.679496	0.0813792	0.019443	-1.58117	-1.42206	-0.734592
	O23482	Oligopeptide transporter 3	OPT3	OPT3_ARATH	OPT3	cellular metal ion homeostasis;iron ion homeostasis;multicellular organism development;protein transport;xylem-to-phloem iron transport	transition metal ion transmembrane transporter activity	integral component of membrane;membrane;plasma membrane;plasmodesma	6	6	6	13.6	13.6	13.6	82.44	18.312	204510000	49	2.29288	0.0197152	0.702439	3.81931	May be involved in the translocation of tetra- andpentapeptides across the cellular membrane in an energy-dependentmanner. Acts also as a metal transporter that could be a componentof the copper transport machinery. Essential for early embryodevelopment.	Strong expression in flowers, leaves androots. Preferentially expressed in the vascular tissues ofseedlings and mature plants as well as in pollen and developingembryos. {ECO:0000269|PubMed:11788749,ECO:0000269|PubMed:12417702}.	Multi-pass membraneprotein {ECO:0000305}.;Membrane {ECO:0000305}	1.04331	0.0831442	0.266288	1.29197	1.12723	-0.148963	-0.848434	-1.77745	-0.0417135	-0.99538
AT2G36390	O23647	1,4-alpha-glucan-branching enzyme 2-1, chloroplastic/amyloplastic	SBE2.1	GLGB1_ARATH	SBE2.1	amylopectin biosynthetic process;carbohydrate metabolic process;cellular response to fructose stimulus;cellular response to glucose stimulus;cellular response to light stimulus;cellular response to sucrose stimulus;glycogen biosynthetic process;starch biosynthetic process;starch metabolic process	1,4-alpha-glucan branching enzyme activity;1,4-alpha-glucan branching enzyme activity (using a glucosylated glycogenin as primer for glycogen synthesis);cation binding;hydrolase activity, hydrolyzing O-glycosyl compounds	amyloplast;chloroplast;chloroplast stroma	21	17	17	37.8	29	29	97.659	93.91	1613600000	210	2.25159	0.0206748	-0.386407	-3.75266	Catalyzes the formation of the alpha-1,6-glucosidiclinkages in starch by scission of a 1,4-alpha-linkedoligosaccharide from growing alpha-1,4-glucan chains and thesubsequent attachment of the oligosaccharide to the alpha-1,6position.	Mostly expressed in roots, stems, seeds,inflorescences, flowers and leaves, and, to a lower extent, inseedlings. {ECO:0000269|PubMed:17698298,ECO:0000269|PubMed:8616246}.	Plastid, chloroplast stroma{ECO:0000269|PubMed:18431481}. Plastid, amyloplast {ECO:0000250}.	-0.429848	-0.688828	-0.432309	-0.533599	-1.70339	-0.382169	1.33508	0.796335	1.42356	0.615168
AT1G43890	O23657	Ras-related protein RABC1	RABC1	RABC1_ARATH	RABC1	intracellular protein transport;Rab protein signal transduction	GTP binding;GTPase activity	Golgi apparatus;plasma membrane	5	5	5	29.7	29.7	29.7	23.53	8.0627	283740000	20	1.78768	0.0421036	-1.88312	-3.03018	Intracellular vesicle trafficking and protein transport		Cytoplasmic side {ECO:0000305}.; Lipid-anchor{ECO:0000305};Cell membrane {ECO:0000305}	0.942983	-0.733084	-1.47748	-1.41751	-0.782454	0.233386	0.822792	0.744099	1.05019	0.617086
AT2G42220	O48529	Rhodanese-like domain-containing protein 9, chloroplastic	STR9	STR9_ARATH	STR9			chloroplast;chloroplast thylakoid;chloroplast thylakoid membrane;integral component of membrane	11	11	11	60.7	60.7	60.7	25.51	154.8	5258600000	217	2.36302	0.0180206	-0.24864	-3.93357			Single-pass membrane protein {ECO:0000305}.;Plastid, chloroplast {ECO:0000305}. Membrane{ECO:0000305}	-0.811419	-0.44621	-0.853725	-1.38173	-0.358101	1.03387	-0.266235	0.255233	1.12121	1.70711
AT4G31700	O48549;A8MS03	40S ribosomal protein S6-1	RPS6A;RPS6	A8MS03_ARATH;RS61_ARATH	RPS6;RPS6A	translation	mRNA binding;structural constituent of ribosome	chloroplast;cytosol;cytosolic ribosome;cytosolic small ribosomal subunit;membrane;nucleolus;plasma membrane;plasmodesma;polysomal ribosome;ribosome	10	3	3	34	14	14	28.367	11.81	1078300000	39	2.02239	0.0289833	0.379232	3.39017	May play an important role in controlling cell growthand proliferation through the selective translation of particularclasses of mRNA.			0.90658	0.304611	-0.255825	1.97577	0.711119	-0.403899	-1.16977	-0.201631	-1.31793	-0.549027
AT5G44720	O48588;F4KBN2		T19K24.17;At5g44720	F4KBN2_ARATH;O48588_ARATH	T19K24.17		catalytic activity;molybdenum ion binding;pyridoxal phosphate binding		9	9	9	43.5	43.5	43.5	34.798	71.105	404720000	47	2.56369	0.0131707	-1.50155	-4.26818				-1.74808	0.144687	-0.467287	-1.3019	-0.581446	0.182499	0.870879	0.796418	1.17859	0.925641
AT4G11600	O48646	Probable phospholipid hydroperoxide glutathione peroxidase 6, mitochondrial	GPX6	GPX6_ARATH	GPX6	response to cadmium ion;response to oxidative stress;response to salt stress	glutathione peroxidase activity;phospholipid-hydroperoxide glutathione peroxidase activity	apoplast;chloroplast;cytosol;mitochondrion;plasma membrane	10	10	10	40.5	40.5	40.5	25.584	24.383	1327400000	94	3.91376	0.00192593	-0.480174	-6.92064	Protects cells and enzymes from oxidative damage, bycatalyzing the reduction of hydrogen peroxide, lipid peroxides andorganic hydroperoxide, by glutathione	Expressed at a low but detectable level inleaves, stems, and flowers, but at a higher level in siliques andeven higher in roots. Predominantly expressed in seeds.{ECO:0000269|PubMed:14617062, ECO:0000269|Ref.1}.	Mitochondrion {ECO:0000305}.	-0.466278	-1.14565	-1.08214	-0.858465	-0.838331	0.992241	1.64474	0.591891	0.31255	0.849445
AT2G26670	O48782;O48782-2	Heme oxygenase 1, chloroplastic	HO1	HMOX1_ARATH	HO1	carotenoid biosynthetic process;cellular response to UV-C;chloroplast-nucleus signaling pathway;flavonoid biosynthetic process;heme oxidation;photosynthesis;phytochromobilin biosynthetic process;regulation of meristem growth;regulation of stomatal movement	heme binding;heme oxygenase (decyclizing) activity;metal ion binding	chloroplast	4	4	4	27	27	27	32.691	61.899	566700000	72	2.61081	0.0121197	0.788738	4.34853	Key enzyme in the synthesis of the chromophore of thephytochrome family of plant photoreceptors. Catalyzes the openingof the heme ring to form the open-chain tetrapyrrole biliverdin IXwith the release of iron and carbon monoxide (CO). Producesspecifically the biliverdin IX-alpha isomer. Can form complex withheme, is ferredoxin-dependent and its activity is increased in thepresence of ascorbate. P…	Widely expressed.{ECO:0000269|PubMed:10339624, ECO:0000269|PubMed:16428602,ECO:0000269|PubMed:20979354}.	Plastid, chloroplast{ECO:0000269|PubMed:10072395, ECO:0000269|PubMed:19860740}.	0.850996	1.24147	0.308692	0.200498	1.37465	-0.121402	-0.800705	-0.950366	-1.7365	-0.367327
AT2G17840	O48832;A0A1P8AYB1;A0A1P8B3G4;F4JNX2		ERD7	A0A1P8AYB1_ARATH;ERD7_ARATH	ERD7	circadian rhythm;response to abscisic acid;response to cold;response to high light intensity;response to salt stress;response to water deprivation		chloroplast;plasma membrane	21	21	21	53.8	53.8	53.8	49	97.732	1397900000	188	3.39753	0.00321569	-0.745792	-5.81043			Plastid, chloroplast {ECO:0000255}.	-1.04797	-0.507264	-0.308865	-0.859568	-1.54128	0.905775	0.812651	0.73827	1.52617	0.282078
AT4G33030	O48917	UDP-sulfoquinovose synthase, chloroplastic	SQD1	SQD1_ARATH	SQD1	cellular response to phosphate starvation;glycolipid biosynthetic process	coenzyme binding;sulfotransferase activity;UDPsulfoquinovose synthase activity;zinc ion binding	chloroplast	13	13	13	42.6	42.6	42.6	53.113	127.5	1051500000	139	1.72076	0.0465036	0.351738	2.9292	Involved in the biosynthesis of sulfolipids found inthylakoid membranes. Converts UDP-glucose and sulfite to thesulfolipid head group precursor UDP-sulfoquinovose		Plastid, chloroplast{ECO:0000269|PubMed:9465123}.	1.23037	0.127152	0.0692212	1.29369	0.691853	-1.66476	0.0356039	-0.725279	0.32392	-1.38177
AT1G77090	O49292	PsbP domain-containing protein 4, chloroplastic	PPD4	PPD4_ARATH	PPD4	photosynthesis	calcium ion binding	chloroplast;chloroplast stroma;chloroplast thylakoid;chloroplast thylakoid lumen;extrinsic component of membrane;photosystem II oxygen evolving complex;thylakoid;thylakoid lumen	7	7	7	48.1	48.1	48.1	28.501	44.907	1996000000	119	2.68182	0.0108161	-0.425285	-4.47097			Plastid, chloroplast thylakoid lumen{ECO:0000269|PubMed:11719511, ECO:0000269|PubMed:18431481}.	-1.74313	-0.577343	-0.64699	-0.317422	-0.723735	0.128249	0.936776	1.71137	0.577112	0.655109
AT1G23130	O49304		T26J12.10	O49304_ARATH		defense response			15	15	15	78.1	78.1	78.1	17.859	45.374	2400100000	170	2.98089	0.00608383	-0.743085	-5.00599				-1.34153	-0.26756	0.149663	-1.45416	-1.21622	0.805327	1.01087	0.871533	0.867238	0.574845
AT4G21210	O49562;O49562-2;Q9MAC9	Pyruvate, phosphate dikinase regulatory protein 1, chloroplastic	RP1	PDRP1_ARATH	RP1		ATP binding;phosphoprotein phosphatase activity;phosphotransferase activity, phosphate group as acceptor;protein kinase activity;protein serine/threonine kinase activity	chloroplast;chloroplast stroma	10	10	10	27.5	27.5	27.5	43.683	48.224	522620000	86	2.85209	0.00774737	0.963688	4.77159	Bifunctional serine/threonine kinase and phosphorylaseinvolved in the dark/light-mediated regulation of PPDK bycatalyzing its phosphorylation/dephosphorylation. Dark/light-induced changes in stromal concentrations of the competing ADP andPi substrates govern the direction of the reaction. In the dark,phosphorylates the catalytic intermediate of PPDK (PPDK-HisP),inactivating it. Light exposure ind…	Expressed in green tissues.{ECO:0000269|PubMed:17996018}.	Plastid, chloroplast stroma{ECO:0000269|PubMed:17996018}.	1.25606	0.00642884	0.301983	1.24408	1.27187	-1.53363	-0.3804	-0.669512	-0.524351	-0.972522
AT4G34980	O49607	Subtilisin-like protease SBT1.6	SBT1.6	SBT16_ARATH	SBT1.6	plant-type cell wall modification	serine-type endopeptidase activity;serine-type peptidase activity	membrane	7	7	7	11.8	11.8	11.8	81.045	32.766	594490000	86	2.2887	0.0198071	-0.647933	-3.81255		Expressed in roots, leaves and flowers ofmature plants. {ECO:0000269|PubMed:12702015}.		-0.944252	-0.765595	-0.356088	0.0554229	-1.79903	1.58321	0.649656	0.806508	0.010763	0.759404
AT4G19170	O49675	Probable carotenoid cleavage dioxygenase 4, chloroplastic	CCD4	CCD4_ARATH	CCD4	carotene catabolic process	9-cis-epoxycarotenoid dioxygenase activity;carotenoid dioxygenase activity;metal ion binding	chloroplast;chloroplast stroma;plastoglobule	27	27	27	63.5	63.5	63.5	65.601	134.73	3944600000	318	3.60466	0.00276543	-0.395845	-6.23955	May be involved in carotenoid cleavage.		Plastid, chloroplast, plastoglobule{ECO:0000269|PubMed:15340011, ECO:0000269|PubMed:16461379,ECO:0000269|PubMed:22274653}.	-0.461936	-0.829328	-0.408303	-1.21783	-1.40287	0.859959	0.673948	1.3215	1.21615	0.248701
AT1G07320	Q2V4Q4;Q3EDH2;O50061	50S ribosomal protein L4, chloroplastic	RPL4	Q2V4Q4_ARATH;Q3EDH2_ARATH;RK4_ARATH	RPL4	translation	poly(U) RNA binding;rRNA binding;structural constituent of ribosome	chloroplast;chloroplast stroma;chloroplast thylakoid membrane;cytosolic ribosome;membrane;nucleus;plastid large ribosomal subunit;ribosome;thylakoid	14	14	14	46	46	46	30.142	106.15	5018300000	238	2.03134	0.0287573	0.482841	3.4041	This protein binds directly and specifically to 23S rRNA(By similarity). May play a role in plastid transcriptionalregulation.		Plastid, chloroplast.	0.259594	0.749061	-0.240521	1.74346	1.13679	-1.57745	-1.01399	-0.466675	-0.4865	-0.103768
AT1G79230	O64530;O64530-2;A8MR47	Thiosulfate/3-mercaptopyruvate sulfurtransferase 1, mitochondrial;Sulfurtransferase	STR1;MST1	A8MR47_ARATH;STR1_ARATH	MST1;STR1	embryo development ending in seed dormancy	3-mercaptopyruvate sulfurtransferase activity;sulfurtransferase activity;thiosulfate sulfurtransferase activity	chloroplast;mitochondrion	11	11	11	39.1	39.1	39.1	41.893	116.78	1446900000	138	2.03358	0.0287512	0.206834	3.4076	Catalyzes the transfer of a sulfur ion from a donor tocyanide or to other thiol compounds. Substrate preference is 3-mercaptopyruvate > thiosulfate. Involved in embryo and seeddevelopment.	Expressed in roots, rosette and caulineleaves, stems, flowers and siliques. {ECO:0000269|PubMed:10951223,ECO:0000269|PubMed:21189252}.	Mitochondrion {ECO:0000269|PubMed:10601861,ECO:0000269|PubMed:10734224, ECO:0000269|PubMed:10951223,ECO:0000269|PubMed:15181206}.	-0.216551	0.656553	1.13226	-0.0392399	2.11688	-0.711095	-0.957701	-0.790528	-0.575736	-0.614847
AT2G34590	O64688	Pyruvate dehydrogenase E1 component subunit beta-3, chloroplastic	E1-BETA-2	ODPB3_ARATH	E1-BETA-2	glycolytic process;pollen tube development	pyruvate dehydrogenase (acetyl-transferring) activity;zinc ion binding	chloroplast;chloroplast envelope	8	8	2	29.1	29.1	9.6	44.015	14.391	763230000	67	2.71001	0.01047	0.681509	4.52005	The pyruvate dehydrogenase complex catalyzes the overallconversion of pyruvate to acetyl-CoA and CO(2). It containsmultiple copies of three enzymatic components: pyruvatedehydrogenase (E1), dihydrolipoamide acetyltransferase (E2) andlipoamide dehydrogenase (E3) (By similarity).		Plastid, chloroplast {ECO:0000305}.	1.18668	0.0655456	0.137889	0.805247	1.82569	-0.379874	-0.649875	-0.865169	-1.13905	-0.987078
AT4G00490	O65258	Beta-amylase 2, chloroplastic	BAM2	BAM2_ARATH	BAM2	polysaccharide catabolic process	amylopectin maltohydrolase activity;beta-amylase activity	chloroplast;chloroplast stroma	17	17	17	39.7	39.7	39.7	61.397	174.17	2181600000	206	4.06668	0.00204878	-0.665079	-7.27711	Low beta-amylase activity. Interacts poorly with starchor other alpha-1,4-glucan.		Plastid, chloroplast{ECO:0000269|PubMed:18390594, ECO:0000269|PubMed:18431481}.	-1.43599	-0.603023	-0.259342	-1.24613	-0.876725	0.945395	1.13552	0.582842	1.12199	0.635451
AT4G00620	O65271;O65269	Bifunctional protein FolD 4, chloroplastic;Methylenetetrahydrofolate dehydrogenase;Methenyltetrahydrofolate cyclohydrolase	FOLD4	FOLD4_ARATH	FOLD4	photorespiration;tetrahydrofolate interconversion;tetrahydrofolate metabolic process	methenyltetrahydrofolate cyclohydrolase activity;methylenetetrahydrofolate dehydrogenase (NADP+) activity	chloroplast;cytosol	8	8	8	36.1	36.1	36.1	38.741	51.561	403200000	77	3.0386	0.00510968	0.62381	5.11309	Catalyzes the oxidation of 5,10-methylenetetrahydrofolate to 5,10-methenyltetrahydrofolate andthen the hydrolysis of 5,10-methenyltetrahydrofolate to 10-formyltetrahydrofolate.		Plastid, chloroplast{ECO:0000269|PubMed:18431481}.	0.0479371	1.61342	0.614988	0.358345	1.516	-0.664786	-0.740268	-1.11044	-0.939639	-0.695549
AT5G20720	O65282	20 kDa chaperonin, chloroplastic	CPN21	CH20_ARATH	CPN20	chaperone cofactor-dependent protein refolding;negative regulation of abscisic acid-activated signaling pathway;positive regulation of superoxide dismutase activity;protein heterotetramerization;response to cadmium ion;response to cold	ATP binding;chaperone binding;copper ion binding;metal ion binding;unfolded protein binding	apoplast;chloroplast;chloroplast envelope;chloroplast stroma;chloroplast thylakoid membrane;mitochondrial matrix;mitochondrion;plastid;thylakoid	17	17	17	64.8	64.8	64.8	26.802	239.46	20209000000	326	2.02314	0.0290239	0.361655	3.39135	Seems to function only as a co-chaperone, along withCPN60, and in certain cases is essential for the discharge ofbiologically active proteins from CPN60 (PubMed:17178727,PubMed:23057508). Required to activate the iron superoxidedismutases (FeSOD) (PubMed:23057508)	Ubiquitous. Most abundant in leaves andinflorescence. Low levels found in roots.{ECO:0000269|PubMed:10205903}.	Plastid, chloroplast{ECO:0000269|PubMed:10205903}.	0.748466	0.786114	1.25715	-0.209256	1.0603	-0.29146	-0.0688796	-0.799358	-2.03585	-0.447229
AT1G11840	O65398;O65398-2;O65398-3	Lactoylglutathione lyase	F12F1.32	GLX1_ARATH	GLX1	methylglyoxal catabolic process to D-lactate via S-lactoyl-glutathione;response to cadmium ion	dioxygenase activity;lactoylglutathione lyase activity;metal ion binding	chloroplast envelope;cytosol;peroxisome;plasma membrane;vacuole	18	18	16	54.1	54.1	45.9	31.928	177.49	6635800000	288	2.84472	0.00795833	-0.550006	-4.75835	Catalyzes the conversion of hemimercaptal, formed frommethylglyoxal and glutathione, to S-lactoylglutathione			-1.32971	-0.144517	-0.0288622	-1.10208	-1.47229	0.431963	0.983738	0.455012	0.977499	1.22925
AT4G22010	O65449		sks4	O65449_ARATH	sks4		copper ion binding;oxidoreductase activity, oxidizing metal ions	membrane;plant-type cell wall;plasmodesma	9	9	7	25	25	20.1	60.455	49.433	665860000	116	1.77454	0.0430933	-0.165321	-3.0103				-0.852413	0.511131	-2.0052	-1.11676	0.00633665	0.881199	0.910011	0.430407	0.30838	0.926905
AT4G35250	O65502		F23E12.190	O65502_ARATH	HCF244	photosystem II assembly	translation initiation factor activity	chloroplast;chloroplast thylakoid	17	17	17	53.2	53.2	53.2	43.723	167.07	5643800000	323	1.7016	0.048129	0.160485	2.90041				0.667746	0.867307	1.25332	0.478631	0.128976	-0.477197	-1.29857	-0.70769	0.799565	-1.71208
AT4G39730	O65660		At4g39730	PLAT1_ARATH	PLAT1	regulation of growth;response to cold;response to salt stress;response to water deprivation	catalase activity;heme binding	chloroplast;chloroplast thylakoid membrane;endoplasmic reticulum;plasma membrane;plastoglobule;thylakoid;vacuolar membrane;vacuole	4	4	3	27.1	27.1	21.5	20.136	65.982	3146400000	102	2.87945	0.00769399	-0.43432	-4.82085	Positive regulator of abiotic stress tolerance involvedin the regulation of plant growth. May be a downstream target ofthe abscisic acid (ABA) signaling pathway	Expressed in root tips, pericycle cells,lateral root primordia, stomata, leaf vasculature, hydathodes andfloral organs. {ECO:0000269|PubMed:25396746}.	Endoplasmic reticulum{ECO:0000269|PubMed:25396746}. Plastid, chloroplast, plastoglobule{ECO:0000269|PubMed:22274653}. Note=Localizes to rod shaped ERstructures that resemble ER bodies. {ECO:0000269|PubMed:25396746}.	-1.67767	-1.02806	0.204883	-0.810396	-0.780003	0.678658	1.40368	0.508331	0.694448	0.806123
AT2G28190	O78310	Superoxide dismutase [Cu-Zn] 2, chloroplastic	CSD2	SODC2_ARATH	CSD2	cellular response to light intensity;cellular response to oxidative stress;cellular response to ozone;cellular response to salt stress;cellular response to sucrose stimulus;cellular response to UV-B;gene silencing by miRNA;removal of superoxide radicals;response to copper ion;response to iron ion;response to oxidative stress	copper ion binding;superoxide dismutase activity;superoxide dismutase copper chaperone activity;zinc ion binding	apoplast;chloroplast;chloroplast stroma;cytoplasm;extracellular space;thylakoid	7	7	7	45.8	45.8	45.8	22.244	323.31	10729000000	214	3.05767	0.0050719	0.47548	5.14876	Destroys radicals which are normally produced within thecells and which are toxic to biological systems. Mediatestolerance to stress, including photo-oxidative stress	Expressed in leaves (at protein level). Thespatial localization is regulated by miR398-mediated silencing.Mostly present in flowers, old rosette leaves and inflorescence,and, to a lower extent, in cauline leaves, stems and roots.{ECO:0000269|PubMed:16861386, ECO:0000269|PubMed:9765550}.	Plastid, chloroplast{ECO:0000269|PubMed:18431481, ECO:0000269|PubMed:9765550}.	0.399562	0.909069	1.10565	0.346129	1.397	-0.352964	-1.49818	-0.770646	-0.23024	-1.30538
AT2G38230	O80448;O80446;Q9ZNR6	Pyridoxal 5-phosphate synthase subunit PDX1.1	PDX11	PDX11_ARATH	PDX11	cellular amino acid metabolic process;pyridoxal phosphate biosynthetic process;pyridoxine biosynthetic process	amine-lyase activity;protein heterodimerization activity;pyridoxal 5'-phosphate synthase (glutamine hydrolysing) activity	chloroplast;cytosol	14	14	10	41.4	41.4	26.5	32.862	135.99	3762400000	252	3.68992	0.00250746	0.654185	6.42238	Catalyzes the formation of pyridoxal 5'-phosphate fromribose 5-phosphate (RBP), glyceraldehyde 3-phosphate (G3P) andammonia. The ammonia is provided by PDX2. Can also use ribulose 5-phosphate and dihydroxyacetone phosphate as substrates, resultingfrom enzyme-catalyzed isomerization of RBP and G3P, respectively.Also plays an indirect role in resistance to singlet oxygen-generating photosensitizers.	Expressed in flowers, shoots, leaves andweakly in roots. {ECO:0000269|PubMed:16766694}.	Cytoplasm {ECO:0000269|PubMed:16157873}.	1.28373	0.595228	0.0756376	1.17887	1.2076	-0.679564	-0.846493	-0.601851	-1.38436	-0.828809
AT2G44640	O80503		At2g44640	O80503_ARATH		ER to chloroplast lipid transport		chloroplast;chloroplast envelope;mitochondrion;plastid;vacuolar membrane	14	14	14	47.7	47.7	47.7	49.83	115.81	1728800000	140	1.83813	0.0385455	0.311322	3.10674				0.387819	0.599291	0.355173	0.968356	1.19689	-2.24306	-0.198924	-0.477992	0.217134	-0.804689
AT2G44040;AT3G59890	O80574;Q8LB01-2;Q8LB01	4-hydroxy-tetrahydrodipicolinate reductase 1, chloroplastic;4-hydroxy-tetrahydrodipicolinate reductase 2, chloroplastic	DAPB1;DAPB2	DAPB1_ARATH;DAPB2_ARATH	DAPB1;DAPB2	diaminopimelate biosynthetic process;lysine biosynthetic process via diaminopimelate	4-hydroxy-tetrahydrodipicolinate reductase;NADPH binding	chloroplast;chloroplast stroma	6	6	6	30	30	30	37.55	25.784	845090000	99	3.92894	0.00203922	0.85379	6.95542	Catalyzes the conversion of 4-hydroxy-tetrahydrodipicolinate (HTPA) to tetrahydrodipicolinate		Plastid, chloroplast {ECO:0000305}.	0.810948	0.551187	0.790708	0.467808	1.77335	-0.622773	-0.756551	-1.11632	-1.09315	-0.805216
AT2G30860	O80852;O80852-2	Glutathione S-transferase F9	GSTF9	GSTF9_ARATH	GSTF9	defense response;defense response to bacterium;glutathione metabolic process;response to cadmium ion;response to zinc ion;toxin catabolic process	copper ion binding;glutathione binding;glutathione peroxidase activity;glutathione transferase activity	apoplast;chloroplast;chloroplast stroma;cytoplasm;cytosol;plasma membrane;plasmodesma;thylakoid;vacuole	22	22	20	67.9	67.9	62.8	24.146	297.38	29846000000	520	2.17776	0.0227865	-0.490791	-3.63456	In vitro, possesses glutathione S-transferase activitytoward 1-chloro-2,4-dinitrobenzene (CDNB) and benzylisothiocyanate (BITC), and glutathione peroxidase activity towardcumene hydroperoxide and linoleic acid-13-hydroperoxide. May beinvolved in the conjugation of reduced glutathione to a widenumber of exogenous and endogenous hydrophobic electrophiles andhave a detoxification role against certai…		Cytoplasm, cytosol {ECO:0000305}.	-1.70846	-0.205249	-0.0126144	-1.45257	-0.364562	0.149661	0.789602	0.391677	0.998146	1.41437
AT2G38410	O80910		At2g38410	TOL6_ARATH	TOL6	protein transport to vacuole involved in ubiquitin-dependent protein catabolic process via the multivesicular body sorting pathway	ubiquitin binding	cytoplasm;early endosome;early endosome membrane;multivesicular body;plasma membrane	2	2	2	4.2	4.2	4.2	72.317	4.2564	22541000	7	4.21239	0.00175	1.71307	7.62971	Acts as a gatekeeper for degradative protein sorting tothe vacuole. Plays a role in recognition of ubiquitinated PIN2auxin carrier at the plasma membrane and further to its endocyticsorting. Binds ubiquitin in vitro (PubMed:24316203). Mightcontribute to the loading of the ESCRT machinery (Probable)	Ubiquitously expressed.{ECO:0000269|PubMed:24699223}.	Peripheral membrane protein{ECO:0000305}.;Endosome, multivesicular body{ECO:0000269|PubMed:22639582}. Cytoplasm{ECO:0000269|PubMed:22639582}. Early endosome membrane{ECO:0000269|PubMed:24316203}	0.29636	0.79357	1.66578	0.833462	0.858464	-0.770356	-0.822085	-1.15691	-0.963541	-0.734749
AT2G37710	O80939;O81292;Q9M345	L-type lectin-domain containing receptor kinase IV.1	LECRK41	LRK41_ARATH	LECRK41	defense response;defense response to bacterium;defense response to oomycetes;response to salicylic acid	ATP binding;carbohydrate binding;transmembrane receptor protein serine/threonine kinase activity	integral component of membrane;plasma membrane	9	8	6	17.6	16.4	13.6	75.541	10.951	687980000	56	2.51584	0.0141705	-0.60806	-4.1873			Single-pass type Imembrane protein {ECO:0000255}.;Membrane {ECO:0000255}	-1.25241	-0.391168	-0.627445	-1.09212	-0.567557	0.95014	0.276359	0.859753	1.9098	-0.0653471
AT2G37760	O80944;A0A1P8B1V1;O80944-3;O80944-2	Aldo-keto reductase family 4 member C8	AKR4C8	A0A1P8B1V1_ARATH;AKRC8_ARATH	AKR4C8	oxidation-reduction process;response to cadmium ion;response to cold;response to salt stress;response to toxic substance;response to water deprivation	alcohol dehydrogenase (NADP+) activity;alditol:NADP+ 1-oxidoreductase activity;aldo-keto reductase (NADP) activity;NADP+ binding;oxidoreductase activity;steroid dehydrogenase activity	cytosol	15	15	13	57.2	57.2	51.1	34.684	26.073	643080000	104	3.83997	0.00173333	2.03598	6.75337	Oxidoreductase acting on a broad range of substrates:reduces ketosteroids, aromatic aldehydes, ketones, sugars andother aliphatic aldehydes, and oxidizes hydroxysteroids. Mayfunction as detoxifiying enzyme by reducing a range of toxicaldehydes and ketones produced during stress			1.09423	0.636823	0.838933	1.05281	0.752392	-1.38137	-0.725791	-1.50883	-0.477266	-0.28193
AT2G26930	O81014	4-diphosphocytidyl-2-C-methyl-D-erythritol kinase, chloroplastic	ISPE	ISPE_ARATH	ISPE	isopentenyl diphosphate biosynthetic process, methylerythritol 4-phosphate pathway;terpenoid biosynthetic process	4-(cytidine 5'-diphospho)-2-C-methyl-D-erythritol kinase activity;ATP binding	chloroplast;chloroplast stroma	7	7	7	29	29	29	42.042	142.14	905470000	74	1.91052	0.0355011	-0.308467	-3.21736	Enzyme of the plastid non-mevalonate pathway forisoprenoid biosynthesis that catalyzes the phosphorylation of theposition 2 hydroxy group of 4-diphosphocytidyl-2C-methyl-D-erythritol. Is essential for chloroplast development	Expressed in leaves, stems, flowers andsiliques. {ECO:0000269|PubMed:18236010}.	Plastid, chloroplast stroma{ECO:0000305|PubMed:18236010}.	-1.3613	0.118181	-0.464225	0.00669215	-1.86186	0.739445	0.00669215	0.970229	0.563528	1.28261
AT2G41740	O81644	Villin-2	VLN2	VILI2_ARATH	VLN2	actin filament bundle assembly;actin filament capping	actin filament binding	cytoplasm;cytoskeleton	29	29	26	46.1	46.1	40.3	107.84	255.91	2656800000	325	1.86613	0.0370833	-0.26882	-3.14943	Ca(2+)-regulated actin-binding protein. Involved inactin filaments bundling. Caps the barbed end of actin filamentsand is able to sever them in a calcium-dependent manner. Requiredfor the construction of actin collars in pollen tubes. Actsredundantly with VLN5 (AC Q9LVC6) to generate thick actin filamentbundles and to regulate polarized pollen tube growth(PubMed:23715472). Acts redundantly with V…	Expressed in all tissues examined. Mainlydetected in the root epidermis and vasculature. Expressed in theroot cap. {ECO:0000269|PubMed:10631247,ECO:0000269|PubMed:22209875, ECO:0000269|PubMed:22563899}.	Cytoplasm, cytoskeleton{ECO:0000269|PubMed:10631247, ECO:0000269|PubMed:23715472}.Note=Present in the apical and subapical regions of pollen tubes.	0.0804939	-0.384621	-1.28363	-0.325867	-1.6155	0.920639	1.58373	0.233269	1.01154	-0.220057
AT4G19710	O81852;O81852-2	Bifunctional aspartokinase/homoserine dehydrogenase 2, chloroplastic;Aspartokinase;Homoserine dehydrogenase	AKHSDH2	AKH2_ARATH	AKHSDH2	homoserine biosynthetic process;lysine biosynthetic process via diaminopimelate;methionine biosynthetic process;threonine biosynthetic process	aspartate kinase activity;ATP binding;homoserine dehydrogenase activity;NADP binding	chloroplast;chloroplast stroma	16	14	14	27.8	23.5	23.5	100.25	27.509	339600000	60	2.26582	0.0204765	1.7995	3.77557			Plastid, chloroplast.	1.07691	0.206672	0.259678	0.902011	1.35103	-0.97294	-0.432306	-0.255874	-0.169611	-1.96557
AT4G33670	O81884	L-galactose dehydrogenase	LGALDH	GALDH_ARATH	LGALDH	galactose metabolic process;L-ascorbic acid biosynthetic process	L-galactose dehydrogenase activity;oxidoreductase activity	cytosol	8	8	8	46.4	46.4	46.4	34.531	142.26	996570000	125	2.18499	0.0229714	0.35704	3.64606	Catalyzes the oxidation of L-galactose to L-galactono-1,4-lactone in the presence of NAD(+). Uses NAD(+) as a hydrogenacceptor much more efficiently than NADP(+)			0.937402	0.565197	0.87716	0.451513	0.916635	-2.00591	0.0073584	-0.572312	0.0986257	-1.27567
AT3G56240	O82089;A0A1I9LNC0	Copper transport protein CCH	CCH	A0A1I9LNC0_ARATH;CCH_ARATH	CCH	cellular copper ion homeostasis;copper ion transport;metal ion transport;response to cadmium ion;response to salt stress	copper chaperone activity;metal ion binding;protein domain specific binding	apoplast;chloroplast	12	12	12	81	81	81	12.971	323.31	2662900000	148	2.44797	0.0158406	-0.679717	-4.07377	Involved in copper homeostasis. Can complement the yeastmutants atx1 and sod1.	Expressed in phloem (at protein level).{ECO:0000269|PubMed:11309142}.		-0.874904	-0.560534	-0.628755	-0.479057	-1.35311	-0.267821	1.13262	0.345604	0.905126	1.78083
AT2G47910	Q3EBE3;O82258		CRR6	CRR6_ARATH;Q3EBE3_ARATH	CRR6	NAD(P)H dehydrogenase complex assembly		chloroplast;chloroplast stroma;chloroplast thylakoid membrane	5	5	5	26.3	26.3	26.3	22.837	18.949	162700000	46	2.12414	0.0245806	1.08767	3.5496	Required for both formation and activity of thechloroplast NAD(P)H dehydrogenase (NDH) complex of thephotosynthetic electron transport chain. May function in assemblyor stabilization of the NDH complex (PubMed:16648216,PubMed:20444231). Required for the accumulation of NDH subcomplexA, which is a core part of NDH. May be involved in post-translational steps during the biogenesis of subcomplex A(P…		Plastid, chloroplast stroma{ECO:0000269|PubMed:20444231}. Note=Previously localized inchloroplast thylakoid membrane fraction.{ECO:0000269|PubMed:16648216}.	0.616567	0.466144	0.703219	0.388397	1.53539	-1.6325	-0.0877611	-0.487533	0.0740956	-1.57601
AT2G35500	O82290	Probable inactive shikimate kinase like 2, chloroplastic	SKL2	SKL2_ARATH	SKL2	phosphorylation		chloroplast	5	5	5	23.8	23.8	23.8	42.687	165.17	266730000	51	3.21981	0.0040315	0.967383	5.45819			Plastid, chloroplast {ECO:0000305}.	0.652853	0.386606	0.791748	1.50189	0.878449	-0.619333	-1.18201	-0.759221	-0.100876	-1.5501
AT2G22780	O82399	Probable malate dehydrogenase, glyoxysomal		MDHX1_ARATH	PMDH1	glyoxylate cycle;malate metabolic process;regulation of fatty acid beta-oxidation;regulation of photorespiration;tricarboxylic acid cycle	L-malate dehydrogenase activity	chloroplast;peroxisome	10	9	9	54.5	51.1	51.1	37.465	102.22	864610000	151	2.38029	0.0177263	0.413945	3.96191	Catalyzes a reversible NAD-dependent dehydrogenasereaction involved in central metabolism and redox homeostasisbetween organelle compartments (Probable). Peroxisomal NAD-dependent malate dehydrogenase involved in fatty acid beta-oxidation. Reoxidizes NADH from the beta-oxidation and providesNAD for the conversion of fatty acyl-CoA to acetyl-CoA. Does notparticipate directly in the glyoxylate cycl…	Expressed in rosette leaves at low levels.{ECO:0000269|PubMed:20876337}.	Peroxisome {ECO:0000269|PubMed:17376163}.	0.849276	0.0266934	1.18483	1.18623	0.613536	-0.31005	-0.880627	-1.24316	0.19651	-1.62324
AT5G66760	O82663;Q9ZPX5	Succinate dehydrogenase [ubiquinone] flavoprotein subunit 1, mitochondrial	SDH1-1	SDHA1_ARATH	SDH1-1	mitochondrial electron transport, succinate to ubiquinone;tricarboxylic acid cycle	ATP binding;cobalt ion binding;electron transfer activity;flavin adenine dinucleotide binding;succinate dehydrogenase (ubiquinone) activity;succinate dehydrogenase activity	cell wall;mitochondrial respiratory chain complex II, succinate dehydrogenase complex (ubiquinone);mitochondrion;plasma membrane succinate dehydrogenase complex;respiratory chain complex II	21	21	21	44.6	44.6	44.6	69.656	249.19	3872900000	310	1.96064	0.0327315	-0.227816	-3.29449	Flavoprotein (FP) subunit of succinate dehydrogenase(SDH) that is involved in complex II of the mitochondrial electrontransport chain and is responsible for transferring electrons fromsuccinate to ubiquinone (coenzyme Q)	Ubiquitous. Preferentially expressed inflowers and inflorescences. {ECO:0000269|PubMed:12374303}.	Matrixside {ECO:0000269|PubMed:14671022}.;Mitochondrion inner membrane{ECO:0000269|PubMed:14671022, ECO:0000305|PubMed:25732537};Peripheral membrane protein {ECO:0000269|PubMed:14671022}	-0.910127	-0.654693	0.453366	-0.521787	-1.96576	0.757493	0.967223	1.31243	0.356534	0.20532
AT5G38430	P10796	Ribulose bisphosphate carboxylase small chain 1B, chloroplastic	RBCS-1B	RBS1B_ARATH	RBCS-1B	photorespiration;reductive pentose-phosphate cycle;response to blue light;response to far red light;response to red light	monooxygenase activity;protein domain specific binding;ribulose-bisphosphate carboxylase activity	apoplast;chloroplast;chloroplast envelope;chloroplast membrane;chloroplast stroma;membrane;thylakoid	21	6	6	68.5	24.3	24.3	20.286	317.36	23990000000	202	1.73776	0.0456877	0.610354	2.9548	RuBisCO catalyzes two reactions: the carboxylation of D-ribulose 1,5-bisphosphate, the primary event in carbon dioxidefixation, as well as the oxidative fragmentation of the pentosesubstrate. Both reactions occur simultaneously and in competitionat the same active site (By similarity).		Peripheral membrane protein{ECO:0000250|UniProtKB:P10795}. Plastid, chloroplast stroma{ECO:0000250|UniProtKB:P10795}.;Plastid, chloroplast membrane{ECO:0000250|UniProtKB:P10795}	-0.102753	-0.413589	0.748349	1.32373	1.87084	-0.705751	-1.15371	-0.359201	-1.00294	-0.204972
AT1G20260;AT1G76030	P11574;Q8W4E2	V-type proton ATPase subunit B1;V-type proton ATPase subunit B3	VHA-B1;VHA-B3	VATB1_ARATH;VATB3_ARATH	VHA-B1;VHA-B3	actin filament bundle assembly;actin filament capping;ATP hydrolysis coupled proton transport;ATP metabolic process;glucose mediated signaling pathway;negative regulation of actin filament depolymerization;regulation of transcription by RNA polymerase II;response to cadmium ion	actin filament binding;ATP binding;hydrolase activity	chloroplast;Golgi apparatus;membrane;nucleus;plasma membrane;plasmodesma;protein-containing complex;proton-transporting V-type ATPase, V1 domain;vacuolar membrane;vacuole	39	39	11	80.9	80.9	22.4	54.107	323.31	32844000000	1063	1.73782	0.0457728	-0.195901	-2.95488	Non-catalytic subunit of the peripheral V1 complex ofvacuolar ATPase. V-ATPase is responsible for acidifying a varietyof intracellular compartments in eukaryotic cells.		Peripheralmembrane protein {ECO:0000305}.;Vacuole membrane {ECO:0000305}	0.178156	0.0777082	-1.53942	-1.20339	-0.939678	0.777135	1.34385	1.03235	0.748337	-0.475044
AT4G18480	P16127	Magnesium-chelatase subunit ChlI-1, chloroplastic	CHLI1	CHLI1_ARATH	CHLI1	chlorophyll biosynthetic process;photosynthesis;response to cytokinin	ATP binding;ATPase activity;magnesium chelatase activity	cell wall;chloroplast;chloroplast stroma;magnesium chelatase complex	25	25	15	64.9	64.9	37.5	46.269	165.99	9342700000	395	2.95638	0.00647953	0.960416	4.96089	Involved in chlorophyll biosynthesis. Catalyzes theinsertion of magnesium ion into protoporphyrin IX to yield Mg-protoporphyrin IX. The magnesium-chelatase is a complex of threesubunits, CHLI, CHLD and CHLH. The reaction takes place in twosteps, with an ATP-dependent activation followed by an ATP-dependent chelation step. Possesses high affinity for ATP and mayplay a major role in chlorophyll bio…		Plastid, chloroplast {ECO:0000305}.	1.06147	0.392662	0.221095	1.29616	1.14933	-0.181632	-0.427012	-0.725255	-1.54296	-1.24386
AT1G79850	P16180	30S ribosomal protein S17, chloroplastic	RPS17	RR17_ARATH	RPS17	plastid translation	rRNA binding;structural constituent of ribosome	chloroplast;chloroplast envelope;chloroplast stroma;chloroplast thylakoid;cytosolic small ribosomal subunit;plastid small ribosomal subunit	8	8	8	40.9	40.9	40.9	16.282	32.687	1277300000	105	2.71148	0.0105185	0.587632	4.5226	One of the primary rRNA binding proteins, it bindsspecifically to the 5'-end of 16S ribosomal RNA (By similarity).Required for optimal plastid performance in terms ofphotosynthesis and growth. Required for the translation of plastidmRNAs. Plays a critical role in biosynthesis of thylakoid membraneproteins encoded by chloroplast genes (PubMed:22900828)		Plastid, chloroplast {ECO:0000305}.	-0.075597	1.30514	0.356986	1.64636	0.788802	-0.935599	-0.429889	-0.911278	-1.32952	-0.415405
AT2G44350	P20115-2;P20115;A0A1I9LSJ6;Q9M1D3;A0A1I9LSJ5	Citrate synthase 4, mitochondrial	CSY4	CISY4_ARATH	CSY4	carbohydrate metabolic process;response to cadmium ion;tricarboxylic acid cycle	ATP binding;citrate (Si)-synthase activity;zinc ion binding	cell wall;chloroplast;mitochondrial matrix;mitochondrion	24	24	24	66.4	66.4	66.4	52.654	221.73	4976900000	394	1.78919	0.0420385	-0.258362	-3.03247			Mitochondrion matrix{ECO:0000269|PubMed:14671022}.	-1.04225	-0.873365	-0.118081	-0.940376	-0.494704	-0.894056	0.765172	1.39466	1.4561	0.746898
AT2G18230	P21216;Q9LFF9	Soluble inorganic pyrophosphatase 2	PPA2	IPYR2_ARATH	PPA2	phosphate-containing compound metabolic process	inorganic diphosphatase activity;magnesium ion binding	cytosol	10	10	6	55	55	43.6	24.671	40.331	1728800000	125	2.90195	0.00730726	-0.800772	-4.86158			Cytoplasm {ECO:0000250|UniProtKB:Q93V56}.	-0.175095	-0.334262	-0.632758	-1.25357	-1.70433	1.01591	0.690968	0.603311	1.39782	0.392003
AT2G28000	P21238	Chaperonin 60 subunit alpha 1, chloroplastic	CPN60A1	CPNA1_ARATH	CPN60A1	chloroplast organization;'de novo' protein folding;embryo development ending in seed dormancy;mitochondrion organization;protein folding;protein refolding	ATP binding;unfolded protein binding	apoplast;chloroplast;chloroplast envelope;chloroplast stroma;cytosol;cytosolic ribosome;membrane;mitochondrion;thylakoid	44	44	44	72.7	72.7	72.7	62.071	323.31	42444000000	989	3.07335	0.00510067	0.601751	5.17821	Binds RuBisCO small and large subunits and is implicatedin the assembly of the enzyme oligomer. Involved in proteinassisted folding. Required for proper chloroplast development	Expressed in leaves, stems, siliques andflowers. {ECO:0000269|PubMed:11402200}.	Plastid, chloroplast.	1.64033	0.209693	0.285643	0.890173	1.13705	-0.707658	-0.556201	-0.39869	-1.2921	-1.20824
AT1G55490	P21240	Chaperonin 60 subunit beta 1, chloroplastic	CPN60B1	CPNB1_ARATH	CPN60B1	cell death;chaperone cofactor-dependent protein refolding;'de novo' protein folding;mitochondrion organization;protein refolding;response to cold;systemic acquired resistance	ATP binding;protein domain specific binding;unfolded protein binding	apoplast;chloroplast;chloroplast envelope;chloroplast stroma;cytosol;cytosolic ribosome;membrane;mitochondrion;plasma membrane;stromule	49	49	13	69.8	69.8	22.7	63.808	323.31	46513000000	1047	3.17071	0.00447761	0.532949	5.36332	Binds RuBisCO small and large subunits and is implicatedin the assembly of the enzyme oligomer. Involved in proteinassisted folding. Required for proper plastid division	Expressed in leaves, stems, petioles andflowers. {ECO:0000269|PubMed:7906560}.	Plastid, chloroplast stroma{ECO:0000269|PubMed:19344532}.	1.17357	0.327518	0.195967	1.24918	1.24948	-0.283148	-0.725143	-0.627828	-1.08049	-1.47911
AT4G25100	P21276;F4JRV2	Superoxide dismutase [Fe] 1, chloroplastic;Superoxide dismutase	FSD1	F4JRV2_ARATH;SODF1_ARATH	FSD1	circadian rhythm;response to cadmium ion;response to copper ion;response to light intensity;response to oxidative stress;response to ozone	copper ion binding;metal ion binding;protein domain specific binding;superoxide dismutase activity	chloroplast;chloroplast envelope;chloroplast membrane;chloroplast nucleoid;chloroplast stroma;cytoplasm;mitochondrion;plasma membrane;thylakoid	8	8	8	54.7	54.7	54.7	23.791	93.783	2733400000	123	3.64001	0.00298592	-1.87054	-6.3149	Destroys radicals which are normally produced within thecells and which are toxic to biological systems;Destroys superoxide anion radicals which are normallyproduced within the cells and which are toxic to biologicalsystems.		Cell membrane {ECO:0000269|PubMed:15060130}.Plastid, chloroplast membrane. Plastid, chloroplast stroma.	-1.07051	-0.962675	-0.752433	-0.612067	-0.931339	0.152383	1.25697	0.410054	0.939638	1.56998
AT5G66570	P23321	Oxygen-evolving enhancer protein 1-1, chloroplastic	PSBO1	PSBO1_ARATH	PSBO1	defense response to bacterium;photoinhibition;photosynthesis, light reaction;photosystem II assembly;photosystem II stabilization;regulation of protein dephosphorylation	oxygen evolving activity;poly(U) RNA binding	apoplast;chloroplast;chloroplast stroma;chloroplast thylakoid;chloroplast thylakoid lumen;chloroplast thylakoid membrane;photosystem II oxygen evolving complex;plastid thylakoid membrane;plastoglobule;thylakoid;thylakoid lumen	32	32	14	71.1	71.1	47.3	35.142	323.31	320150000000	1277	3.7024	0.00242424	-0.340003	-6.44945	Stabilizes the manganese cluster which is the primarysite of water splitting.	Leaves.	Lumenalside {ECO:0000269|PubMed:11719511, ECO:0000269|PubMed:2583096}.Note=Associated with the photosystem II complex.; Peripheral membrane protein{ECO:0000269|PubMed:11719511, ECO:0000269|PubMed:2583096};Plastid, chloroplast thylakoid membrane{ECO:0000269|PubMed:11719511, ECO:0000269|PubMed:18431481,ECO:0000269|PubMed:2583096}	-1.09091	-0.0681303	-0.914363	-1.59678	-0.67385	0.874449	1.00072	0.720416	1.14972	0.598726
AT1G11260	P23586	Sugar transport protein 1	STP1	STP1_ARATH	STP1	monosaccharide transmembrane transport	carbohydrate:proton symporter activity;monosaccharide transmembrane transporter activity	integral component of plasma membrane;nucleus;plasma membrane;plasmodesma;vacuole	5	5	5	10.7	10.7	10.7	57.61	29.396	238590000	62	1.99687	0.0304225	0.938699	3.35054	Major hexose transporter. Mediates an active uptake ofhexoses, by sugar/hydrogen symport. Can transport glucose, 3-O-methylglucose, fructose, xylose, mannose, galactose, fucose, 2-deoxyglucose and arabinose. Confers sensitivity to galactose inseedlings.	Mostly expressed in young leaves, especiallyin guard cells (at protein level). Also present in roots.{ECO:0000269|PubMed:12508063, ECO:0000269|PubMed:12972665,ECO:0000269|PubMed:2209537}.	Multi-pass membrane protein {ECO:0000305|PubMed:15308754,ECO:0000305|PubMed:7920712}.;Cell membrane {ECO:0000269|PubMed:15060130,ECO:0000305|PubMed:15308754, ECO:0000305|PubMed:7920712}	1.15111	0.0352193	0.356922	0.833083	1.24827	-2.18247	-0.442232	-0.362356	-0.298405	-0.339136
AT4G35090	P25819;A0A1P8B564;F4JM86	Catalase-2;Catalase	CAT2	A0A1P8B564_ARATH;CATA2_ARATH;F4JM86_ARATH	CAT2	cell death;cell redox homeostasis;cellular response to nitrogen starvation;cellular response to phosphate starvation;cellular response to sulfate starvation;circadian rhythm;hydrogen peroxide biosynthetic process;hydrogen peroxide catabolic process;nitric oxide homeostasis;photoperiodism;protein nitrosylation;response to abscisic acid;response to bacterium;response to cadmium ion;response to cold…	catalase activity;cobalt ion binding;heme binding;metal ion binding	chloroplast;cytosolic ribosome;glyoxysome;mitochondrion;peroxisome;plasma membrane;stromule	33	26	17	75	66.3	52.4	56.931	323.31	24716000000	581	2.25832	0.0207975	0.483111	3.76349	Occurs in almost all aerobically respiring organisms andserves to protect cells from the toxic effects of hydrogenperoxide.		Cytoplasm {ECO:0000269|PubMed:25700484}.Peroxisome {ECO:0000269|PubMed:25700484}. Glyoxysome.	1.66376	-0.0699317	-0.150444	1.14167	1.20687	-0.204369	-1.19717	-0.606068	-0.820545	-0.963772
AT3G44890	P25864	50S ribosomal protein L9, chloroplastic	RPL9	RK9_ARATH	RPL9	translation	rRNA binding;structural constituent of ribosome	chloroplast;chloroplast envelope;chloroplast stroma;mitochondrion;plastid large ribosomal subunit	11	11	11	56.3	56.3	56.3	22.134	76.682	2359500000	153	2.07292	0.0270433	0.5613	3.46906	Binds to the 23S rRNA.		Plastid, chloroplast.	0.667737	-0.326993	0.763025	0.719965	1.8526	-0.495977	-0.208954	-0.323026	-1.24187	-1.40651
AT3G25920	P25873	50S ribosomal protein L15, chloroplastic	RPL15	RK15_ARATH	RPL15	response to cytokinin;translation	structural constituent of ribosome	chloroplast;chloroplast envelope;chloroplast stroma;plastid large ribosomal subunit	13	13	13	45.1	45.1	45.1	29.707	170.87	6357100000	262	2.02945	0.028862	0.362336	3.40117			Plastid, chloroplast.	1.24015	0.48417	-0.114207	1.19068	0.846299	0.323748	-0.814574	-1.71696	-0.314362	-1.12494
AT3G47470	P27521	Chlorophyll a-b binding protein 4, chloroplastic	LHCA4	CA4_ARATH	LHCA4	photosynthesis, light harvesting in photosystem I;protein-chromophore linkage;response to cold;response to high light intensity;response to karrikin;response to light stimulus;response to low light intensity stimulus	chlorophyll binding;metal ion binding;protein domain specific binding	chloroplast;chloroplast envelope;chloroplast thylakoid;chloroplast thylakoid membrane;integral component of membrane;membrane;photosystem I;plastoglobule;thylakoid	12	12	12	64.5	64.5	64.5	27.733	323.31	19015000000	344	1.77122	0.0433232	-0.312537	-3.00528	The light-harvesting complex (LHC) functions as a lightreceptor, it captures and delivers excitation energy tophotosystems with which it is closely associated		Multi-pass membrane protein {ECO:0000255}.;Plastid, chloroplast thylakoid membrane{ECO:0000269|PubMed:10818090, ECO:0000269|PubMed:12766230}	-2.13165	-0.346096	0.307197	-0.583139	-0.700505	-0.0672721	0.456614	0.810492	1.13616	1.1182
AT1G75040	P28493	Pathogenesis-related protein 5		PR5_ARATH		regulation of anthocyanin biosynthetic process;response to cadmium ion;response to UV-B;response to virus;systemic acquired resistance		apoplast;cell wall;vacuole	10	10	10	54.8	54.8	54.8	25.252	179.5	1590900000	140	3.01788	0.00526708	-1.56705	-5.07448	Partially responsible for acquired pathogen resistance.		Secreted, extracellular space, apoplast.Note=Accumulates in the apoplast before secretion.	-1.30618	0.0507204	-0.273456	-1.12387	-1.49049	0.59865	0.625019	0.669985	1.16723	1.08239
AT5G61790	P29402	Calnexin homolog 1	CNX1	CALX1_ARATH	CNX1	protein folding	calcium ion binding;carbohydrate binding;unfolded protein binding	chloroplast;endoplasmic reticulum;endoplasmic reticulum membrane;integral component of membrane;membrane;mitochondrion;plant-type cell wall;plasma membrane;plasmodesma;vacuolar membrane;vacuole	21	21	16	43.2	43.2	31.5	60.485	323.31	5114200000	363	3.54855	0.00293333	-0.309474	-6.12125	Calcium-binding protein that interacts with newlysynthesized glycoproteins in the endoplasmic reticulum. It may actin assisting protein assembly and/or in the retention within theER of unassembled protein subunits. It seems to play a major rolein the quality control apparatus of the ER by the retention ofincorrectly folded proteins (By similarity).		Single-pass type I membrane protein {ECO:0000250}.;Endoplasmic reticulum membrane{ECO:0000250}	-0.778288	-0.474815	-0.840856	-1.26839	-0.943613	1.77044	0.702635	0.686287	0.252308	0.894296
AT2G24200	P30184;F4INR3	Leucine aminopeptidase 1	PM25;At2g24200	AMPL1_ARATH;F4INR3_ARATH	LAP1	response to cadmium ion	aminopeptidase activity;dipeptidase activity;manganese ion binding;metalloexopeptidase activity	chloroplast stroma;cytoplasm;cytosol;vacuole	29	29	22	76.2	76.2	63.7	54.509	323.31	15933000000	659	3.12445	0.00475524	-0.34728	-5.27488	Presumably involved in the processing and regularturnover of intracellular proteins. Catalyzes the removal ofunsubstituted N-terminal amino acids from various peptides(Probable). Possesses leucine aminopeptidase activity against themodel substrate leucine-amido methyl coumarin (PubMed:22493451).Possesses Cys-Gly dipeptidase activity. In addition, can cleaveCys-Leu and Leu-Cys dipeptides (PubMed:2…		Cytoplasm.	-0.761246	-0.617509	-0.0880327	-1.01395	-1.69963	1.12151	1.08526	0.866059	0.951037	0.156506
AT3G51260	P30186;Q2V3Q0	Proteasome subunit alpha type-7-A	PAD1	PSA7A_ARATH;Q2V3Q0_ARATH	PAD1	proteasomal protein catabolic process;proteasomal ubiquitin-independent protein catabolic process;proteasome-mediated ubiquitin-dependent protein catabolic process;ubiquitin-dependent protein catabolic process	endopeptidase activity;threonine-type endopeptidase activity	chloroplast;cytoplasm;cytosol;cytosolic ribosome;nucleus;phragmoplast;proteasome complex;proteasome core complex;proteasome core complex, alpha-subunit complex;spindle;vacuolar membrane;vacuole	14	14	5	66.4	66.4	28.8	27.337	228.06	2909000000	237	1.83131	0.0390301	0.202872	3.09637	The proteasome is a multicatalytic proteinase complexwhich is characterized by its ability to cleave peptides with Arg,Phe, Tyr, Leu, and Glu adjacent to the leaving group at neutral orslightly basic pH.;The proteasome is a multicatalytic proteinase complexwhich is characterized by its ability to cleave peptides with Arg,Phe, Tyr, Leu, and Glu adjacent to the leaving group at neutral orslightly b…	Expressed in roots, leaves and flowers.{ECO:0000269|PubMed:1516703}.	Cytoplasm {ECO:0000250}. Nucleus{ECO:0000269|PubMed:11387208}.;Cytoplasm {ECO:0000256|RuleBase:RU000551}.Nucleus {ECO:0000256|RuleBase:RU000551,ECO:0000256|SAAS:SAAS00594407}.	0.794962	1.11977	1.22395	-0.455073	0.818604	-1.05977	-0.938768	-1.15466	-0.99315	0.644144
AT3G16640	P31265	Translationally-controlled tumor protein homolog	TCTP	TCTP1_ARATH	TCTP1	auxin homeostasis;cell proliferation;defense response to bacterium;drought recovery;embryo development ending in seed dormancy;lateral root development;pollen tube growth;positive regulation of microtubule depolymerization;post-embryonic development;regulation of cell growth;regulation of mitotic cell cycle;regulation of multicellular organism growth;regulation of stomatal closure;response to cad…	calcium ion binding;microtubule binding;protein domain specific binding	apoplast;chloroplast;cytoplasm;cytosol;Golgi apparatus;nucleus;plasma membrane;plasmodesma;pollen tube;thylakoid;vacuolar membrane	11	11	11	54.2	54.2	54.2	18.91	77.026	6239900000	244	1.85142	0.0377469	0.235315	3.12698	General regulator required for the development of theentire plant. Regulates the duration of cell cycle(PubMed:20736351). Probable activator of Rab GTPases and upstreamregulator of the cell growth-regulating TOR (target of rapamycin)network (PubMed:19060111, PubMed:20736351). Might also controlspatial growth in pollen tubes or root hairs via the TORC2signaling branch (PubMed:19060111). Involved i…	Expressed in flowers, leaves and stems(PubMed:16902407, PubMed:19060111). Expressed in roots andsiliques. Detected in seeds. Highest expression in activelydividing and differentiating cell types, such as the meristematicand division zones of the root, the embryo or the elongating tubeof germinating pollen (PubMed:19060111). Expressed in cotyledons,leaves, hypocotyls and roots. Detected in mitotic…	Cytoplasm, cytosol{ECO:0000269|PubMed:24040826}.	0.675655	0.339603	0.0816897	1.18297	1.23791	0.625584	-1.11814	-0.46022	-1.69876	-0.866302
AT1G22780;AT1G34030;AT4G09800	P34788	40S ribosomal protein S18	RPS18A	RS18_ARATH	RPS18A;RPS18B;RPS18C	translational initiation	mRNA binding;rRNA binding;structural constituent of ribosome	cell wall;cytosol;cytosolic ribosome;cytosolic small ribosomal subunit;membrane;nucleolus;plasma membrane;plasmodesma;ribosome;vacuolar membrane;vacuole	9	9	9	55.3	55.3	55.3	17.545	103.78	6494100000	209	1.70344	0.0480576	0.251711	2.90318	Located at the top of the head of the 40S subunit, itcontacts several helices of the 18S rRNA.		Cytoplasm.	0.0847755	-0.440074	0.838509	1.10264	1.8117	-0.0176488	-0.206185	-0.712622	-1.32749	-1.13362
AT4G38740	P34790	Peptidyl-prolyl cis-trans isomerase CYP18-3	CYP18-3	CP18C_ARATH	CYP18-3	blue light signaling pathway;brassinosteroid mediated signaling pathway;de-etiolation;plant-type hypersensitive response;protein refolding;red, far-red light phototransduction;regulation of protein phosphorylation;response to cadmium ion;response to cytokinin;response to light stimulus;signal transduction	cyclosporin A binding;peptidyl-prolyl cis-trans isomerase activity;unfolded protein binding	apoplast;chloroplast;cytosol;Golgi apparatus;plasma membrane	13	13	7	85.5	85.5	57	18.373	102.42	4923600000	228	3.22294	0.00406349	-0.640549	-5.46426	PPIases accelerate the folding of proteins. It catalyzesthe cis-trans isomerization of proline imidic peptide bonds inoligopeptides. Involved in de-etiolation. Reduces the sensitivityto brassinosteroids by decreasing somehow the abundance of thepartially dephosphorylated form of BES1. Triggers the activationof bacterial AvrRpt2 protease activity upon infection byP.syringae. Activated AvrRpt2 conf…	Ubiquitous. {ECO:0000269|PubMed:15047905,ECO:0000269|PubMed:8132503}.	Cytoplasm {ECO:0000305}.	-1.15188	-0.383941	-0.352091	-1.12803	-1.19659	1.39069	1.45098	0.320144	0.482503	0.56822
AT3G27830;AT3G27850	P36212;P36210	50S ribosomal protein L12-3, chloroplastic;50S ribosomal protein L12-1, chloroplastic	RPL12C;RPL12A	RK121_ARATH;RK123_ARATH	RPL12A;RPL12C	defense response to bacterium;response to cytokinin;translation	structural constituent of ribosome	chloroplast;chloroplast envelope;chloroplast stroma;chloroplast thylakoid membrane;nucleoid;plasmodesma;plastid large ribosomal subunit;thylakoid	10	10	10	53.5	53.5	53.5	19.682	97.347	6128100000	167	3.13983	0.00462857	0.361782	5.30418			Plastid, chloroplast.	0.868714	0.421409	0.679507	1.51973	0.696163	0.0461198	-1.4469	-0.707309	-0.868403	-1.20903
AT5G26000	P37702;P37702-2	Myrosinase 1	TGG1	BGL38_ARATH	TGG1	abscisic acid-activated signaling pathway;carbohydrate metabolic process;defense response to insect;glucosinolate catabolic process;regulation of stomatal movement;response to abscisic acid;response to insect;response to salt stress	beta-glucosidase activity;glucosinolate glucohydrolase activity;metal ion binding;scopolin beta-glucosidase activity;thioglucosidase activity	apoplast;chloroplast;cytosolic ribosome;peroxisome;plant-type cell wall;thylakoid;vacuole	35	35	34	54.7	54.7	52.7	61.132	323.31	132630000000	1581	6.15464	0	-1.92899	-13.8846	Degradation of glucosinolates (glucose residue linked bya thioglucoside bound to an amino acid derivative) to glucose,sulfate and any of the products: thiocyanates, isothiocyanates,nitriles, epithionitriles or oxazolidine-2-thiones. These toxicdegradation products can deter insect herbivores. Seems tofunction in abscisic acid (ABA) and methyl jasmonate (MeJA)signaling in guard cells. Functionally…	Expressed in guard cells, phloem-associatedcells and myrosin cells. {ECO:0000269|PubMed:15316292}.	Vacuole {ECO:0000250}.	-0.996333	-0.592063	-0.719411	-1.10426	-1.23589	0.864323	0.893071	0.835657	0.889354	1.16555
AT3G45140	P38418	Lipoxygenase 2, chloroplastic	LOX2	LOX2_ARATH	LOX2	green leaf volatile biosynthetic process;jasmonic acid biosynthetic process;lipid oxidation;oxylipin biosynthetic process;response to bacterium;response to fungus;response to herbivore;response to jasmonic acid;response to wounding	linoleate 13S-lipoxygenase activity;metal ion binding	chloroplast;chloroplast envelope;chloroplast stroma;chloroplast thylakoid membrane;cytoplasm	81	81	12	85.4	85.4	11.8	102.04	323.31	155090000000	1846	4.33477	0.002	-0.585086	-7.93606	13S-lipoxygenase that can use linolenic acid assubstrates. Plant lipoxygenases may be involved in a number ofdiverse aspects of plant physiology including growth anddevelopment, pest resistance, and senescence or responses towounding. Catalyzes the hydroperoxidation of lipids containing acis,cis-1,4-pentadiene structure. Required for the wound-inducedsynthesis of jasmonic acid (JA) in leaves	In leaves and inflorescences but not abundantin seeds, roots and stems. {ECO:0000269|PubMed:17369372}.	Plastid, chloroplast{ECO:0000269|PubMed:18431481}. Cytoplasm. Note=The unprocessedform is cytoplasmic whereas the cleaved form is chloroplastic.	-1.18825	-0.741625	-0.161601	-1.30735	-1.0693	0.647711	0.831672	0.784385	1.14297	1.06138
AT5G13490	P40941	ADP,ATP carrier protein 2, mitochondrial	AAC2	ADT2_ARATH	AAC2	purine nucleotide transport	ATP:ADP antiporter activity;copper ion binding	chloroplast;chloroplast envelope;integral component of membrane;membrane;mitochondrial envelope;mitochondrial inner membrane;mitochondrion;vacuolar membrane	15	4	4	27.8	9.6	9.6	41.745	50.634	3420700000	70	1.86545	0.0370728	-0.31797	-3.14838	Catalyzes the exchange of ADP and ATP across themitochondrial inner membrane.		Multi-pass membrane protein{ECO:0000269|PubMed:14671022}.;Mitochondrion inner membrane{ECO:0000269|PubMed:14671022}	-1.11217	-1.1275	0.403466	-1.15375	-0.538641	-0.536931	1.47969	0.86513	0.883748	0.836962
AT3G49010	P41127;A8MQA1;F4IWP7;Q9SMT4	60S ribosomal protein L13-1;60S ribosomal protein L13	RPL13B;BBC1	A8MQA1_ARATH;F4IWP7_ARATH;RL131_ARATH	BBC1;RPL13B	response to cytokinin;translation	mRNA binding;structural constituent of ribosome	cell wall;cytosol;cytosolic large ribosomal subunit;cytosolic ribosome;membrane;nucleolus;plasma membrane;plasmodesma;polysomal ribosome;ribosome;vacuolar membrane	19	19	13	61.7	61.7	44.2	23.767	224.38	7908900000	304	2.75871	0.00939048	0.224897	4.60546			Cytoplasm.	-0.18074	1.37427	1.01361	0.860515	0.974353	-1.1658	-1.28297	-0.862739	-0.780713	0.050226
AT1G54270	P41377;F4HV96	Eukaryotic initiation factor 4A-2	TIF4A-2;EIF4A-2	F4HV96_ARATH;IF4A2_ARATH	EIF4A-2;TIF4A-2	response to cadmium ion	ATP binding;helicase activity;mRNA binding;nucleic acid binding;translation initiation factor activity	cytosol;plasma membrane;plasmodesma;vacuolar membrane	30	30	7	86.9	86.9	26	46.762	297.47	18104000000	620	1.89888	0.035691	0.269368	3.19951	ATP-dependent RNA helicase which is a subunit of theeIF4F complex involved in cap recognition and is required for mRNAbinding to ribosome. In the current model of translationinitiation, eIF4A unwinds RNA secondary structures in the 5'-UTRof mRNAs which is necessary to allow efficient binding of thesmall ribosomal subunit, and subsequent scanning for the initiatorcodon (By similarity).	Ubiquitous. Preferentially expressed inflowers, young leaves and roots. {ECO:0000269|PubMed:17168887}.	Cytoplasm {ECO:0000250}.	0.670496	1.49857	-0.218103	1.53282	0.0700673	-0.29261	-0.53169	-0.241486	-1.6804	-0.807671
AT5G14320	P42732;B3H631	30S ribosomal protein S13, chloroplastic	RPS13;At5g14320	B3H631_ARATH;RR13_ARATH	EMB3137;RPS13	translation	RNA binding;rRNA binding;structural constituent of ribosome	chloroplast;chloroplast envelope;chloroplast stroma;mitochondrion;ribosome	9	9	9	39.6	39.6	39.6	19.096	12.82	1057000000	96	2.53553	0.0133696	0.690524	4.2205	Located at the top of the head of the 30S subunit, itcontacts several helices of the 16S rRNA.		Plastid, chloroplast.	0.118476	0.451128	0.825805	1.83869	0.706293	-0.691845	-1.35028	-0.2431	-1.3226	-0.332563
AT1G02930	P42760	Glutathione S-transferase F6	GSTF6	GSTF6_ARATH	GSTF6	defense response to bacterium;glutathione metabolic process;response to cadmium ion;response to oxidative stress;response to salt stress;response to water deprivation;toxin catabolic process	camalexin binding;cobalt ion binding;copper ion binding;glutathione binding;glutathione transferase activity;quercitrin binding	cell wall;cytoplasm;cytosol;mitochondrion;plasmodesma;vacuole	14	12	6	81.7	77.9	51	23.486	83.334	3346200000	139	1.68941	0.0495814	-0.727786	-2.88211	Involved in camalexin biosynthesis by probablycatalyzing the conjugation of GSH with indole-3-acetonitrile(IAN). May be involved in the conjugation of reduced glutathioneto a wide number of exogenous and endogenous hydrophobicelectrophiles and have a detoxification role against certainherbicides.		Cytoplasm, cytosol {ECO:0000305}.	-0.922177	-0.218383	0.450875	-1.67909	-1.01672	0.819742	0.182023	-0.039914	0.763561	1.66007
AT1G76180	P42763	Dehydrin ERD14	ERD14	ERD14_ARATH	ERD14	cold acclimation;protein stabilization;regulation of membrane permeability;response to abscisic acid;response to cold;response to desiccation;response to water deprivation	calcium ion binding;phosphatidylcholine binding;phosphatidylserine binding	chloroplast;cytosol;extrinsic component of membrane;membrane;plasma membrane	11	10	10	49.7	45.4	45.4	20.786	274.33	3363200000	193	2.3858	0.017583	-0.766965	-3.97096	Intrinsically disordered protein acting as a chaperone.Prevents heat-induced aggregation and/or inactivation of varioussubstrates. Binds to acidic phospholipid vesicles withoutaffecting membrane fluidity.	In stems, cauline leaves, roots and flowers.Low levels found in maturing seeds. Absent in dry seeds.		-0.706982	-0.570969	-0.239153	-2.00182	-0.344623	0.668914	1.48407	0.0785697	0.855827	0.77616
AT5G08590	P43292;A0A1P8BD58;Q9FFP9	Serine/threonine-protein kinase SRK2G	SRK2G	A0A1P8BD58_ARATH;SRK2G_ARATH	SNRK2.1;SRK2G	intracellular signal transduction;protein phosphorylation;response to osmotic stress;response to salt stress	ATP binding;kinase activity;protein kinase activity;protein serine/threonine kinase activity	cytoplasm;nucleus	8	8	6	26.3	26.3	19.5	40.197	38.594	608100000	81	2.01182	0.0294871	-0.328356	-3.37374		Expressed in seedlings.{ECO:0000269|PubMed:15292193}.	Nucleus {ECO:0000269|PubMed:18433157}.	-0.206715	-1.05973	0.526916	-1.23393	-1.66153	0.540742	1.05764	0.701797	0.178023	1.15678
AT1G09760	P43333	U2 small nuclear ribonucleoprotein A		RU2A_ARATH		mRNA splicing, via spliceosome;response to cold	RNA binding	Cajal body;chloroplast;cytoplasm;cytosol;nucleolus;nucleoplasm;nucleus	9	9	9	48.6	48.6	48.6	28.041	33.071	387680000	68	1.91105	0.0355351	0.26404	3.21816	This protein is associated with sn-RNP U2. It helps theA' protein to bind stem loop IV of U2 snRNA (By similarity)		Nucleus {ECO:0000305}.	0.128888	0.852406	1.60546	-0.216549	1.19269	-1.75257	-0.863648	-0.204329	-0.177294	-0.565053
AT4G23100	P46309;F4JMS5	Glutamate--cysteine ligase, chloroplastic	GSH1	F4JMS5_ARATH;GSH1_ARATH	GSH1	defense response by callose deposition in cell wall;defense response to bacterium;defense response to bacterium, incompatible interaction;defense response to fungus;defense response to insect;flower development;glucosinolate biosynthetic process;glutathione biosynthetic process;indole phytoalexin biosynthetic process;response to cadmium ion;response to heat;response to jasmonic acid;response to o…	ATP binding;glutamate-cysteine ligase activity	chloroplast;chloroplast stroma;plastid	19	19	19	49.4	49.4	49.4	58.562	291.67	6304000000	414	2.25204	0.0207385	0.201091	3.75338	Seems to play an important role in controlling theexpression of resistance responses like the regulation ofsalicylic acid (SA) and phytoalexin (camalexin) production.Involved in resistance to fungal and bacterial pathogens. Requiredfor the regulation of cell proliferation in root apical meristemsthrough the GSH-dependent developmental pathway. Also participatesin the detoxification process, the a…	Abundant in leaves and roots. Expressed to ahigh level in leaf trichomes of mature plant.{ECO:0000269|PubMed:10995473}.	Plastid, chloroplast{ECO:0000269|PubMed:15610346}.	1.91799	0.946554	0.3228	0.57649	0.0243974	-1.3679	-0.518957	-0.767013	-0.0121951	-1.12217
AT5G27380	P46416	Glutathione synthetase, chloroplastic	GSH2	GSHB_ARATH	GSH2	glutathione biosynthetic process;response to jasmonic acid	ATP binding;glutathione binding;glutathione synthase activity;magnesium ion binding;protein homodimerization activity	chloroplast;cytosol	21	21	21	47.7	47.7	47.7	60.27	101.5	2259800000	235	1.73227	0.0461926	0.185872	2.94653			Plastid, chloroplast.	1.01079	-0.597162	1.37174	1.05378	0.582832	-0.116366	-0.206008	-0.723872	-0.521594	-1.85414
AT2G30970	P46643	Aspartate aminotransferase, mitochondrial	ASP1	AAT1_ARATH	ASP1	2-oxoglutarate metabolic process;aspartate metabolic process;biosynthetic process;glutamate metabolic process;response to cadmium ion	copper ion binding;L-aspartate:2-oxoglutarate aminotransferase activity;pyridoxal phosphate binding	mitochondrial matrix;mitochondrion	27	27	27	77.4	77.4	77.4	47.757	202.52	7909600000	462	2.43695	0.016259	-0.148727	-4.05547	Amino acid aminotransferase important for the metabolismof amino acids and Krebs-cycle related organic acids. No activitywith D-Asp or D-Ala as amino donors. In plants, it is involved innitrogen metabolism and in aspects of carbon and energymetabolism.		Mitochondrion matrix{ECO:0000269|PubMed:14671022}.	-0.757727	-0.781617	-0.145311	-1.82185	-0.38413	1.13011	0.735382	0.789907	1.36672	-0.13148
AT5G11520	P46644	Aspartate aminotransferase 3, chloroplastic	ASP3	AAT3_ARATH	ASP3	2-oxoglutarate metabolic process;aspartate metabolic process;biosynthetic process;glutamate metabolic process;leaf senescence	L-aspartate:2-oxoglutarate aminotransferase activity;pyridoxal phosphate binding	chloroplast;membrane;peroxisome;plastid	15	11	11	41.6	33.2	33.2	48.954	34.243	1055400000	119	2.68644	0.0109273	0.515845	4.47898	Amino acid aminotransferase important for the metabolismof amino acids and Krebs-cycle related organic acids. No activitywith D-Asp or D-Ala as amino donors. In plants, it is involved innitrogen metabolism and in aspects of carbon and energymetabolism.	Expressed in roots, cauline leaves, flowers,hypocotyl epidermis and root hair cells.{ECO:0000269|PubMed:11230571, ECO:0000269|PubMed:14754918}.	Plastid, chloroplast{ECO:0000269|PubMed:14754918}. Note=accumulates in stromules,which are membrane-bound protrusions of the plastid envelopecontaining soluble stroma. Stromules are often found connectingplastids within a cell.	0.781464	0.217075	0.83278	1.47042	0.708936	-0.521045	-0.195127	-1.20827	-1.76364	-0.32259
AT5G10450	P48349;F4KGV2;F4KGV5;P48349-2	14-3-3-like protein GF14 lambda	GRF6	14336_ARATH;F4KGV2_ARATH;F4KGV5_ARATH	GRF6	brassinosteroid mediated signaling pathway;defense response to bacterium;positive regulation of protein catabolic process;response to cadmium ion;response to cold;response to freezing	protein domain specific binding	cell wall;chloroplast;cytoplasm;cytosol;nucleus;plasma membrane	21	19	11	78.2	78.2	48.8	27.975	250.9	11083000000	460	1.72683	0.0462574	0.201489	2.93834	Is associated with a DNA binding complex that binds tothe G box, a well-characterized cis-acting DNA regulatory elementfound in plant genes (By similarity). Specific negative regulatorof slow-vacuolar (SV) ion channel. Mediates F-actin dynamicspossibly through inhibiting ADF1 phosphorylation(PubMed:26345162). Negative regulator of freezing tolerance thatmodulates cold-responsive C-repeat-binding …		Nucleus {ECO:0000269|PubMed:15592873,ECO:0000269|PubMed:28344081}. Cell membrane{ECO:0000269|PubMed:15592873}. Cytoplasm{ECO:0000269|PubMed:28344081}. Note=Translocates from the cytosolto the nucleus when phosphorylated by CRPK1 in response to coldstress. {ECO:0000269|PubMed:28344081}.	0.958654	1.66539	1.22528	0.427051	-0.858969	-0.822763	-1.09709	-0.885031	-0.437641	-0.174881
AT3G19450	P48523	Cinnamyl alcohol dehydrogenase 4	CAD4	CADH4_ARATH	CAD4	lignin biosynthetic process;response to karrikin	cinnamyl-alcohol dehydrogenase activity;sinapyl alcohol dehydrogenase activity;zinc ion binding		14	14	13	57.3	57.3	53.2	39.098	93.109	1767800000	245	2.87011	0.00778378	0.607495	4.804	Involved in lignin biosynthesis in the floral stem.Catalyzes the final step specific for the production of ligninmonomers. Catalyzes the NADPH-dependent reduction ofconiferaldehyde, 5-hydroxyconiferaldehyde, sinapaldehyde, 4-coumaraldehyde and caffeyl aldehyde to their respective alcohols	Expressed at the lateral root initiationsites, in the vascular tissues of the primary lateral root and theroot caps. Expressed in the hypocotyl, cotyledon and leaf veins,apical meristem region, hydathodes, at the base of the trichomesand cauline leaves. In stems, expressed in the cells associatedwith the vascular cambium, interfascicular cambium and thedeveloping xylem. Expressed in the vascular …		1.28833	0.741463	0.652007	1.08759	0.318172	-0.49568	-0.901117	0.104747	-1.16853	-1.62699
AT5G20830	P49040;Q9LXL5;Q9M111;A0A1P8BF00;A0A1P8BF02;Q00917	Sucrose synthase 1	SUS1	SUS1_ARATH	SUS1	response to cadmium ion;response to cold;response to flooding;response to glucose;response to hypoxia;response to mannitol;response to osmotic stress;response to sorbitol;response to sucrose;response to water deprivation;sucrose metabolic process	sucrose synthase activity	cytosol;plasmodesma	23	23	23	41	41	41	92.996	101.08	1249500000	162	6.49305	0	-0.870754	-15.3554	Sucrose-cleaving enzyme that provides UDP-glucose andfructose for various metabolic pathways	Expressed in the phloem of leaves and inroots. Detected in the whole plant but more precisely confined tothe vasculature in cotyledons, mature leaves and siliques.{ECO:0000269|PubMed:14739263, ECO:0000269|PubMed:17257168,ECO:0000269|PubMed:18635527, ECO:0000269|PubMed:8220487}.		-1.27456	-1.0291	-0.835631	-0.634068	-0.891579	1.08744	0.853604	0.977467	0.751552	0.994879
AT5G64040	P49107;F4KC80;P49107-2	Photosystem I reaction center subunit N, chloroplastic	PSAN	PSAN_ARATH	PSAN	photosynthesis	protein domain specific binding	chloroplast photosystem I	11	11	11	36.3	36.3	36.3	18.429	111.93	9728300000	209	2.25725	0.020805	-0.425462	-3.76177	May function in mediating the binding of the antennacomplexes to the PSI reaction center and core antenna. Plays animportant role in docking plastocyanin to the PSI complex. Doesnot bind pigments.		Peripheral membrane protein;Lumenal side.;Plastid, chloroplast thylakoid membrane{ECO:0000269|PubMed:18431481}	-1.41244	-0.314208	-0.36394	-0.290923	-1.40978	0.652445	0.195181	0.279054	0.780054	1.88456
ATCG00190	P50546	DNA-directed RNA polymerase subunit beta	rpoB	RPOB_ARATH	rpoB	DNA-templated transcription, elongation	DNA binding;DNA-directed 5'-3' RNA polymerase activity;ribonucleoside binding	chloroplast;nucleoid	9	9	9	15	15	15	121.06	104.93	274950000	71	2.18345	0.0229091	1.23487	3.64361	DNA-dependent RNA polymerase catalyzes the transcriptionof DNA into RNA using the four ribonucleoside triphosphates assubstrates.		Plastid, chloroplast.	0.84317	0.180551	0.908832	0.683905	1.1305	-0.651564	-0.381921	0.243716	-2.06273	-0.894463
AT1G35680	P51412	50S ribosomal protein L21, chloroplastic	RPL21	RK21_ARATH	RPL21	chloroplast organization;embryo development ending in seed dormancy;response to cold;thylakoid membrane organization;translation	rRNA binding;structural constituent of ribosome	chloroplast;chloroplast envelope;chloroplast stroma;nucleus;ribosome	9	9	9	52.7	52.7	52.7	24.038	232.94	2866500000	130	2.93377	0.00683721	0.42691	4.9195	This protein binds to 23S ribosomal RNA in the presenceof protein L20.		Plastid, chloroplast.	0.910606	0.613023	0.285927	1.56911	0.73354	-0.489723	-0.683524	-0.904199	-1.76516	-0.269599
AT1G59900	P52901;A0A1P8AQS2	Pyruvate dehydrogenase E1 component subunit alpha-1, mitochondrial	E1 ALPHA	A0A1P8AQS2_ARATH;ODPA1_ARATH	E1	acetyl-CoA biosynthetic process from pyruvate;glycolytic process;response to cadmium ion	pyruvate dehydrogenase (acetyl-transferring) activity	cytosol;intracellular membrane-bounded organelle;mitochondrial matrix;mitochondrion;nucleus	16	16	13	48.1	48.1	41.6	43.059	80.424	3897500000	293	2.17952	0.0227944	-0.224068	-3.63735	The pyruvate dehydrogenase complex catalyzes the overallconversion of pyruvate to acetyl-CoA and CO(2);The pyruvate dehydrogenase complex catalyzes the overallconversion of pyruvate to acetyl-CoA and CO(2). It containsmultiple copies of three enzymatic components: pyruvatedehydrogenase (E1), dihydrolipoamide acetyltransferase (E2) andlipoamide dehydrogenase (E3).	Expressed in roots, rosettes and flowers.{ECO:0000269|PubMed:7590338}.	Mitochondrion matrix{ECO:0000269|PubMed:14671022}.	-0.463832	-0.418455	0.214744	-1.33951	-1.73749	0.293666	0.576345	0.966441	1.49148	0.416601
AT5G09810	P53492;A0A1P8AY15;Q8GWA5	Actin-7	ACT7	ACT7_ARATH	ACT7	cell division;response to auxin;response to light stimulus;response to wounding;root development;root epidermal cell differentiation;root hair elongation;seed germination	ATP binding;structural constituent of cytoskeleton	cell wall;chloroplast envelope;chloroplast stroma;cytoskeleton;cytosol;mitochondrion;nucleolus;plasma membrane;plasmodesma	30	30	10	79.6	79.6	31.6	41.735	323.31	49921000000	756	4.03209	0.002	-0.391439	-7.1953	Actins are highly conserved proteins that are involvedin various types of cell motility and are ubiquitously expressedin all eukaryotic cells. Essential component of cell cytoskeleton;plays an important role in cytoplasmic streaming, cell shapedetermination, cell division, organelle movement and extensiongrowth. This is considered as one of the vegetative actins whichis involved in the regulation…	Constitutively expressed at high levels inyoung expanding vegetative tissues. Also strongly expressed in thehypocotyl and seed coat. Little or no expression is detected inmature pollen sacs, ovules, embryos or seeds.	Cytoplasm, cytoskeleton.	-0.391027	-0.600026	-0.814962	-1.58975	-1.01882	0.997038	1.20401	0.627861	1.07787	0.507814
AT4G25130	P54150	Peptide methionine sulfoxide reductase A4, chloroplastic	MSR4	MSRA4_ARATH	MSR4	cellular response to oxidative stress;response to cytokinin;response to light stimulus	L-methionine-(S)-S-oxide reductase activity;peptide-methionine (S)-S-oxide reductase activity	chloroplast;chloroplast envelope;chloroplast stroma;cytoplasm;mitochondrion	11	11	11	43.8	43.8	43.8	28.644	136.34	3036200000	175	4.33545	0.00207407	0.676028	7.9378	Catalyzes the reduction of methionine sulfoxide (MetSO)to methionine in proteins. Plays a protective role againstoxidative stress by restoring activity to proteins that have beeninactivated by methionine oxidation. Prevents the methioninesulfoxidation of the heat shock protein HSP21 and its subsequentinactivation. MSRA family specifically reduces the MetSO S-enantiomer.	Expressed in rosette and cauline leaves, andat lower levels in stems and flowers (at protein level).{ECO:0000269|PubMed:10806242}.	Plastid, chloroplast stroma.	1.07437	1.29196	0.143855	0.884967	1.07309	-0.967839	-0.897529	-0.74168	-1.24431	-0.616869
AT2G39800	P54887;B9DFG0;F4IFZ9	Delta-1-pyrroline-5-carboxylate synthase A;Glutamate 5-kinase;Gamma-glutamyl phosphate reductase	P5CSA;P5CS1	B9DFG0_ARATH;F4IFZ9_ARATH;P5CS1_ARATH	P5CS1;P5CSA	hyperosmotic salinity response;L-proline biosynthetic process;pollen development;proline biosynthetic process;response to oxidative stress;response to salt stress;response to water deprivation;root development	ATP binding;delta1-pyrroline-5-carboxylate synthetase activity;glutamate 5-kinase activity;glutamate-5-semialdehyde dehydrogenase activity	chloroplast;cytoplasm;membrane	29	29	17	50.2	50.2	34.6	77.701	106.63	3124400000	276	2.23326	0.0216024	-0.428419	-3.72322	P5CS plays a key role in proline biosynthesis, leadingto osmoregulation in plants.			-2.14169	-0.652767	-0.0931982	-0.507396	-0.382076	0.31878	1.30444	0.516361	0.532094	1.10544
AT3G01120	P55217	Cystathionine gamma-synthase 1, chloroplastic	CGS1	CGS1_ARATH	CGS1	methionine biosynthetic process;selenium compound metabolic process	cystathionine gamma-synthase activity;pyridoxal phosphate binding	chloroplast;chloroplast stroma	7	7	7	14.4	14.4	14.4	59.918	31.729	554020000	85	3.57349	0.00294253	0.688202	6.17363	Catalyzes the first committed step of methionine (Met)biosynthesis. Catalyzes the formation of L-cystathionine fromhomoserine esters and L-cysteine, via a gamma-replacementreaction. Substrate preference for cystathionine synthesis is O-phospho-L-homoserine (OPH) > O(4)-succinyl-L-homoserine (OSH) >>O-acetyl-L-homoserine (OAH). Is able, at extremely low rate, tocatalyze a gamma-elimination of OPH …		Plastid, chloroplast{ECO:0000269|PubMed:25146485}.	0.721273	1.41012	0.644691	0.472409	1.06388	-0.914045	-0.135557	-0.628537	-1.28429	-1.34995
AT5G19220	P55229	Glucose-1-phosphate adenylyltransferase large subunit 1, chloroplastic	ADG2	GLGL1_ARATH	ADG2	glycogen biosynthetic process;starch biosynthetic process	ATP binding;glucose-1-phosphate adenylyltransferase activity	chloroplast;chloroplast envelope;chloroplast stroma	33	33	33	71.3	71.3	71.3	57.673	323.31	13112000000	631	1.93045	0.0344	-0.201339	-3.24796	This protein plays a role in synthesis of starch. Itcatalyzes the synthesis of the activated glycosyl donor, ADP-glucose from Glc-1-P and ATP.	Leaves.	Plastid, chloroplast.	0.0972602	-0.998869	-1.15904	-0.353527	-1.16299	1.52176	-0.0949369	0.80585	1.47658	-0.132091
AT4G39210	P55231	Glucose-1-phosphate adenylyltransferase large subunit 3, chloroplastic	APL3	GLGL3_ARATH	APL3	glycogen biosynthetic process;starch biosynthetic process	ATP binding;glucose-1-phosphate adenylyltransferase activity	chloroplast	4	4	4	14	14	14	58.029	5.4642	99553000	14	2.91891	0.00712644	-1.16884	-4.89241	This protein plays a role in synthesis of starch. Itcatalyzes the synthesis of the activated glycosyl donor, ADP-glucose from Glc-1-P and ATP.	Probably are expressed in roots, flowersand/or seeds.	Plastid, chloroplast.	-0.722044	-0.243518	-1.56847	-1.29799	-0.274515	0.123749	0.611469	1.12226	1.02136	1.2277
ATCG00120	P56757	ATP synthase subunit alpha, chloroplastic	atpA	ATPA_ARATH	atpA	ATP synthesis coupled proton transport;defense response to bacterium;response to cold	ATP binding;proton-transporting ATP synthase activity, rotational mechanism;zinc ion binding	chloroplast;chloroplast thylakoid;chloroplast thylakoid membrane;membrane;mitochondrion;plastoglobule;proton-transporting ATP synthase complex, catalytic core F(1);stromule;thylakoid;thylakoid lumen	38	38	37	70.8	70.8	69.4	55.328	323.31	374090000000	2817	1.86778	0.0371297	-0.19347	-3.15194	Produces ATP from ADP in the presence of a protongradient across the membrane. The alpha chain is a regulatorysubunit.		Peripheral membrane protein{ECO:0000255|HAMAP-Rule:MF_01346}.;Plastid, chloroplast thylakoid membrane{ECO:0000255|HAMAP-Rule:MF_01346}	0.319733	-1.53667	-1.63551	-0.944848	0.266913	0.315417	0.794803	1.18111	0.662573	0.57648
ATCG00270	P56761	Photosystem II D2 protein	psbD	PSBD_ARATH	psbD	photosynthetic electron transport in photosystem II;protein-chromophore linkage	chlorophyll binding;electron transporter, transferring electrons within the cyclic electron transport pathway of photosynthesis activity;iron ion binding	chloroplast;chloroplast thylakoid;chloroplast thylakoid membrane;integral component of membrane;membrane;plasma membrane-derived thylakoid photosystem II;plastoglobule;thylakoid	15	15	15	29.5	29.5	29.5	39.547	323.31	188380000000	539	2.77037	0.00935922	-0.391988	-4.62604	Photosystem II (PSII) is a light-driven water:plastoquinone oxidoreductase that uses light energy to abstractelectrons from H(2)O, generating O(2) and a proton gradientsubsequently used for ATP formation. It consists of a core antennacomplex that captures photons, and an electron transfer chain thatconverts photonic excitation into a charge separation. The D1/D2(PsbA/PsbA) reaction center heterod…		Multi-pass membrane protein{ECO:0000255|HAMAP-Rule:MF_01383}.;Plastid, chloroplast thylakoid membrane{ECO:0000255|HAMAP-Rule:MF_01383}	-0.000400135	-1.56784	-0.658244	-0.964348	-0.85609	0.458621	0.809101	1.13935	1.50479	0.135063
ATCG00740	P56762	DNA-directed RNA polymerase subunit alpha	rpoA	RPOA_ARATH	rpoA	transcription, DNA-templated	DNA binding;DNA-directed 5'-3' RNA polymerase activity;protein dimerization activity	chloroplast;chloroplast stroma;chloroplast thylakoid;cytoplasm;nucleoid	7	7	7	28.3	28.3	28.3	38.137	31.85	375320000	75	3.71809	0.00246154	0.914001	6.48361	DNA-dependent RNA polymerase catalyzes the transcriptionof DNA into RNA using the four ribonucleoside triphosphates assubstrates.		Plastid, chloroplast.	1.06346	0.434759	0.939008	1.07722	0.833273	-0.356944	-0.710786	-0.838086	-1.7809	-0.661001
ATCG00350	P56766	Photosystem I P700 chlorophyll a apoprotein A1	psaA	PSAA_ARATH	psaA	photosynthesis;protein-chromophore linkage	4 iron, 4 sulfur cluster binding;chlorophyll binding;electron transfer activity;magnesium ion binding	chloroplast;chloroplast envelope;chloroplast thylakoid;chloroplast thylakoid membrane;integral component of membrane;membrane;photosystem I;plastoglobule;thylakoid	29	29	29	32.1	32.1	32.1	83.23	254.21	89912000000	506	4.18872	0.00169697	-0.594955	-7.57156	PsaA and PsaB bind P700, the primary electron donor ofphotosystem I (PSI), as well as the electron acceptors A0, A1 andFX. PSI is a plastocyanin-ferredoxin oxidoreductase, convertingphotonic excitation into a charge separation, which transfers anelectron from the donor P700 chlorophyll pair to thespectroscopically characterized acceptors A0, A1, FX, FA and FB inturn. Oxidized P700 is reduced on t…		Multi-pass membrane protein{ECO:0000255|HAMAP-Rule:MF_00458}.;Plastid, chloroplast thylakoid membrane{ECO:0000255|HAMAP-Rule:MF_00458}	-0.396818	-0.915221	-1.17444	-0.746568	-1.21045	0.934729	0.826009	1.49392	0.8274	0.361442
ATCG00340	P56767	Photosystem I P700 chlorophyll a apoprotein A2	psaB	PSAB_ARATH	psaB	photosynthesis;protein-chromophore linkage	4 iron, 4 sulfur cluster binding;chlorophyll binding;electron transfer activity;magnesium ion binding	chloroplast;chloroplast envelope;chloroplast thylakoid;chloroplast thylakoid membrane;integral component of membrane;membrane;photosystem I;plastoglobule;thylakoid	22	22	22	36.5	36.5	36.5	82.474	323.31	91738000000	883	3.01878	0.0053	-0.544753	-5.07616	PsaA and PsaB bind P700, the primary electron donor ofphotosystem I (PSI), as well as the electron acceptors A0, A1 andFX. PSI is a plastocyanin-ferredoxin oxidoreductase, convertingphotonic excitation into a charge separation, which transfers anelectron from the donor P700 chlorophyll pair to thespectroscopically characterized acceptors A0, A1, FX, FA and FB inturn. Oxidized P700 is reduced on t…		Multi-pass membrane protein{ECO:0000255|HAMAP-Rule:MF_00482}.;Plastid, chloroplast thylakoid membrane{ECO:0000255|HAMAP-Rule:MF_00482}	-0.418347	-0.77153	-0.955794	-1.08538	-0.912548	1.16478	1.14859	1.3224	0.866996	-0.359166
ATCG00680	P56777	Photosystem II CP47 reaction center protein	psbB	PSBB_ARATH	psbB	photosynthetic electron transport in photosystem II;photosystem II assembly;protein-chromophore linkage	chlorophyll binding;electron transporter, transferring electrons within the cyclic electron transport pathway of photosynthesis activity	chloroplast;chloroplast thylakoid;chloroplast thylakoid membrane;integral component of membrane;membrane;photosystem II;plastoglobule;thylakoid	32	32	32	47.8	47.8	47.8	56.036	323.31	347130000000	4116	3.13333	0.00461972	-0.38573	-5.29178	One of the components of the core complex of photosystemII (PSII). It binds chlorophyll and helps catalyze the primarylight-induced photochemical processes of PSII. PSII is a light-driven water:plastoquinone oxidoreductase, using light energy toabstract electrons from H(2)O, generating O(2) and a protongradient subsequently used for ATP formation.		Multi-pass membrane protein{ECO:0000255|HAMAP-Rule:MF_01495}.;Plastid, chloroplast thylakoid membrane{ECO:0000255|HAMAP-Rule:MF_01495}	-0.019193	-1.23225	-1.11823	-0.646086	-1.16758	0.582712	0.811347	1.01946	1.5356	0.234232
ATCG00280	P56778	Photosystem II CP43 reaction center protein	psbC	PSBC_ARATH	psbC	photosynthetic electron transport in photosystem II;protein-chromophore linkage	chlorophyll binding;electron transporter, transferring electrons within the cyclic electron transport pathway of photosynthesis activity;metal ion binding	chloroplast;chloroplast stromal thylakoid;chloroplast thylakoid;chloroplast thylakoid membrane;integral component of membrane;membrane;photosystem II reaction center;plastoglobule;thylakoid	23	23	23	42.5	42.5	42.5	51.867	323.31	314940000000	1061	2.36066	0.0180274	-0.23046	-3.9297	One of the components of the core complex of photosystemII (PSII). It binds chlorophyll and helps catalyze the primarylight-induced photochemical processes of PSII. PSII is a light-driven water:plastoquinone oxidoreductase, using light energy toabstract electrons from H(2)O, generating O(2) and a protongradient subsequently used for ATP formation.		Multi-pass membrane protein {ECO:0000255|HAMAP-Rule:MF_01496,ECO:0000305}.;Plastid, chloroplast thylakoid membrane{ECO:0000255|HAMAP-Rule:MF_01496, ECO:0000269|PubMed:11113141}	0.0682295	-0.78332	-0.766216	-0.424342	-1.94424	0.23078	1.18579	1.3121	0.448823	0.672397
ATCG00830;ATCG01310	P56791	50S ribosomal protein L2, chloroplastic	rpl2-A	RK2_ARATH	rpl2-A;rpl2-B	mitochondrial translation	mRNA binding;rRNA binding;structural constituent of ribosome;transferase activity	chloroplast;chloroplast envelope;chloroplast stroma;membrane;mitochondrial large ribosomal subunit	14	14	14	55.8	55.8	55.8	29.864	323.31	6252300000	288	3.92768	0.002	0.608726	6.95252			Plastid, chloroplast.	0.812639	0.699737	0.459121	1.0876	1.33464	-0.530288	-0.543917	-1.48363	-1.24319	-0.592719
ATCG00790	P56793;Q84WZ8	50S ribosomal protein L16, chloroplastic	rpl16	RK16_ARATH	rpl16	mitochondrial translation	rRNA binding;structural constituent of ribosome	chloroplast;chloroplast envelope;chloroplast stroma;mitochondrial large ribosomal subunit	4	4	4	42.2	42.2	42.2	15.294	13.985	1130900000	85	2.02008	0.0290476	0.454853	3.38659			Plastid, chloroplast.	0.838322	0.952613	-0.408289	0.818304	1.43973	0.381815	-0.822134	-1.4106	-1.07862	-0.711134
ATCG00160	P56797	30S ribosomal protein S2, chloroplastic	rps2	RR2_ARATH	rps2	translation	structural constituent of ribosome	chloroplast;chloroplast stroma;membrane;mitochondrial small ribosomal subunit	12	12	12	46.2	46.2	46.2	26.904	80.461	2379100000	189	2.18816	0.023	0.523847	3.65111			Plastid, chloroplast.	0.944355	0.857689	0.283799	1.20356	0.460452	0.657519	-1.28727	-0.676062	-1.00031	-1.44374
ATCG00800	P56798	30S ribosomal protein S3, chloroplastic	rps3	RR3_ARATH	rps3	translation	rRNA binding;structural constituent of ribosome	chloroplast;chloroplast envelope;chloroplast stroma;cytosolic small ribosomal subunit;membrane;nucleoid	13	13	13	53.2	53.2	53.2	25.188	131.86	6472300000	232	4.60691	0	0.598727	8.65285			Plastid, chloroplast.	0.895878	0.428164	0.712679	1.42611	1.04583	-1.17313	-0.52697	-0.69561	-0.991053	-1.1219
ATCG00770	P56801	30S ribosomal protein S8, chloroplastic	rps8	RR8_ARATH	rps8	translation	rRNA binding;structural constituent of ribosome	chloroplast;chloroplast envelope;chloroplast stroma;cytosolic small ribosomal subunit;membrane	7	7	7	43.3	43.3	43.3	15.479	17.44	1524200000	66	4.1016	0.00215385	0.727304	7.36044	One of the primary rRNA binding proteins, it bindsdirectly to 16S rRNA central domain where it helps coordinateassembly of the platform of the 30S subunit.		Plastid, chloroplast.	0.73733	0.0850198	0.917321	1.37549	1.31259	-1.01214	-0.764058	-0.722112	-0.994171	-0.935276
ATCG00750	P56802	30S ribosomal protein S11, chloroplastic	rps11	RR11_ARATH	rps11	maturation of SSU-rRNA from tricistronic rRNA transcript (SSU-rRNA, 5.8S rRNA, LSU-rRNA);ribosomal small subunit assembly;translation	mRNA 5'-UTR binding;small ribosomal subunit rRNA binding;structural constituent of ribosome	chloroplast;chloroplast stroma;mitochondrial small ribosomal subunit	5	5	5	33.3	33.3	33.3	15.023	52.684	842860000	54	2.75581	0.00934597	0.692902	4.60035			Plastid, chloroplast.	1.06917	-0.0784298	0.66207	0.923581	1.46438	-1.13758	0.0550421	-0.714124	-1.33402	-0.910085
	P56804	30S ribosomal protein S14, chloroplastic	rps14	RR14_ARATH	rps14	translation	rRNA binding;structural constituent of ribosome	chloroplast;ribosome	3	3	3	27	27	27	11.785	6.0928	407270000	51	2.21048	0.0221053	1.11212	3.68673	Binds 16S rRNA, required for the assembly of 30Sparticles.		Plastid, chloroplast.	0.803438	0.36382	0.63655	1.42637	0.533277	0.354467	-0.770367	-0.543584	-0.876477	-1.92749
AT2G01250	P60040;A8MRH4	60S ribosomal protein L7-2	RPL7B;At2g01250	A8MRH4_ARATH;RL72_ARATH	RPL7B	maturation of LSU-rRNA from tricistronic rRNA transcript (SSU-rRNA, 5.8S rRNA, LSU-rRNA)	mRNA binding;structural constituent of ribosome	cell wall;chloroplast;cytosol;cytosolic large ribosomal subunit;cytosolic ribosome;membrane;plasma membrane;polysomal ribosome;ribosome;vacuolar membrane;vacuole	20	20	10	65.7	65.7	39.3	28.171	191.63	7406000000	285	1.84633	0.038	0.350333	3.11923				0.742165	0.838394	0.77996	0.451511	0.701867	-1.9823	-0.873203	-1.2536	0.276853	0.318344
ATCG00900;ATCG01240	P61841	30S ribosomal protein S7, chloroplastic	rps7-A	RR7_ARATH	rps7-A;rps7-B	ribosomal small subunit assembly;translation	mRNA binding;rRNA binding;structural constituent of ribosome	chloroplast;membrane;small ribosomal subunit;thylakoid	7	7	7	41.9	41.9	41.9	17.357	23.368	2395700000	133	1.93893	0.0337618	0.565815	3.26101	One of the primary rRNA binding proteins, it bindsdirectly to 16S rRNA where it nucleates assembly of the headdomain of the 30S subunit.		Plastid, chloroplast.	0.0366222	-0.415716	0.994405	1.85068	1.11735	-0.609663	-0.414837	-0.335137	-1.24408	-0.979625
ATCG01060	P62090	Photosystem I iron-sulfur center	psaC	PSAC_ARATH	psaC	photosynthesis;photosynthetic electron transport in photosystem I	4 iron, 4 sulfur cluster binding;electron transfer activity;metal ion binding	chloroplast;chloroplast stromal thylakoid;chloroplast thylakoid;chloroplast thylakoid membrane;membrane;photosystem I	6	6	6	74.1	74.1	74.1	9.0384	182.63	7304500000	161	3.01674	0.00520245	-0.354404	-5.07236	essential for photochemical activity. FB isthe terminal electron acceptor of PSI, donating electrons toferredoxin. The C-terminus interacts with PsaA/B/D and helpsassemble the protein into the PSI complex. Required for binding ofPsaD and PsaE to PSI. PSI is a plastocyanin-ferredoxinoxidoreductase, converting photonic excitation into a chargeseparation, which transfers an electron from the donor P…		Peripheral membrane protein{ECO:0000255|HAMAP-Rule:MF_01303}; Stromal side{ECO:0000255|HAMAP-Rule:MF_01303}.;Plastid, chloroplast thylakoid membrane{ECO:0000255|HAMAP-Rule:MF_01303}	-0.557541	-1.12277	-0.498135	-1.27122	-0.6932	0.102625	0.319711	0.829538	1.21737	1.67362
AT5G08680;AT5G08690	P83483;P83484;Q9C5A9	ATP synthase subunit beta-1, mitochondrial;ATP synthase subunit beta-2, mitochondrial;ATP synthase subunit beta-3, mitochondrial		ATPBM_ARATH;ATPBN_ARATH;ATPBO_ARATH		ATP synthesis coupled proton transport;response to cadmium ion	ATP binding;copper ion binding;poly(U) RNA binding;proton-transporting ATP synthase activity, rotational mechanism	chloroplast envelope;membrane;mitochondrial proton-transporting ATP synthase complex;mitochondrial proton-transporting ATP synthase complex, catalytic core F(1);mitochondrial respiratory chain complex I;mitochondrion;nucleolus	32	31	31	72.3	70.3	70.3	59.67	323.31	51084000000	934	2.54357	0.0132648	-0.291357	-4.23408	Mitochondrial membrane ATP synthase (F(1)F(0) ATPsynthase or Complex V) produces ATP from ADP in the presence of aproton gradient across the membrane which is generated by electrontransport complexes of the respiratory chain. F-type ATPasesconsist of two structural domains, F(1) - containing theextramembraneous catalytic core, and F(0) - containing themembrane proton channel, linked together by a…		Mitochondrion {ECO:0000269|PubMed:11743114,ECO:0000269|PubMed:14671022}. Mitochondrion inner membrane{ECO:0000305}. Note=Peripheral membrane protein. {ECO:0000305}.;Mitochondrion {ECO:0000305|PubMed:25732537}.Mitochondrion inner membrane {ECO:0000250}. Note=Peripheralmembrane protein.	-0.39033	-0.475725	-0.056225	-2.05353	-0.968495	0.538033	0.851873	0.444643	1.16621	0.943548
ATCG00020	P83755	Photosystem II protein D1	psbA	PSBA_ARATH	psbA	photosynthetic electron transport in photosystem II;protein-chromophore linkage;response to herbicide	chlorophyll binding;electron transporter, transferring electrons within the cyclic electron transport pathway of photosynthesis activity;iron ion binding;oxidoreductase activity, acting on diphenols and related substances as donors, oxygen as acceptor	chloroplast;chloroplast thylakoid;chloroplast thylakoid membrane;integral component of membrane;membrane;photosystem II;plastoglobule;thylakoid	12	12	12	33.4	33.4	33.4	38.936	323.31	172110000000	522	2.02644	0.0288269	-0.275523	-3.39648	Photosystem II (PSII) is a light-driven water:plastoquinone oxidoreductase that uses light energy to abstractelectrons from H(2)O, generating O(2) and a proton gradientsubsequently used for ATP formation. It consists of a core antennacomplex that captures photons, and an electron transfer chain thatconverts photonic excitation into a charge separation. The D1/D2(PsbA/PsbA) reaction center heterod…		Multi-pass membrane protein{ECO:0000255|HAMAP-Rule:MF_01379}.;Plastid, chloroplast thylakoid membrane{ECO:0000255|HAMAP-Rule:MF_01379}	-0.696466	-0.595553	0.0160605	-0.902874	-1.4662	0.842904	0.503688	1.7646	0.964972	-0.431133
AT5G54600	P92959;F4K1S8	50S ribosomal protein L24, chloroplastic	RPL24;At5g54600	F4K1S8_ARATH;RK24_ARATH	RPL24	plastid translation;translation	rRNA binding;structural constituent of ribosome	chloroplast;chloroplast envelope;chloroplast stroma;mitochondrion;ribosome	11	11	11	47.5	47.5	47.5	21.976	60.755	1773000000	108	2.72424	0.0100465	0.493548	4.54492	One of two assembly initiator proteins, it bindsdirectly to the 5'-end of the 23S rRNA, where it nucleatesassembly of the 50S subunit (By similarity). Required for optimalplastid performance in terms of photosynthesis and growth.Required for the translation of plastid mRNAs. Plays a criticalrole in biosynthesis of thylakoid membrane proteins encoded bychloroplast genes (PubMed:22900828).		Plastid, chloroplast{ECO:0000269|PubMed:21923745}.	1.05639	-0.278206	0.926138	1.2899	1.03302	-0.549509	-0.975906	-1.2381	-1.19409	-0.0696356
AT4G17170	P92963	Ras-related protein RABB1c	RABB1C	RAB1C_ARATH	RABB1C	endoplasmic reticulum to Golgi vesicle-mediated transport;intracellular protein transport;Rab protein signal transduction	GTP binding;GTPase activity	Golgi apparatus;membrane;plasma membrane;vacuole	13	13	8	63	63	44.5	23.164	50.883	1072900000	139	3.0222	0.0052327	-0.292778	-5.08251	Intracellular vesicle trafficking and protein transport		Cytoplasmic side {ECO:0000305}.; Lipid-anchor{ECO:0000305};Cell membrane {ECO:0000305}	-1.10066	-0.204217	-0.682186	-0.900168	-1.25759	1.12569	-0.184527	0.755902	1.12083	1.32693
AT2G33800	P93014	30S ribosomal protein S5, chloroplastic	rps5	RR5_ARATH	rps5	adaxial/abaxial pattern specification;chloroplast rRNA processing;plastid translation;response to cadmium ion;response to cold	rRNA binding;structural constituent of ribosome	chloroplast;chloroplast stroma;chloroplast thylakoid;chloroplast thylakoid membrane;membrane;mitochondrial small ribosomal subunit;nucleus;thylakoid	13	13	13	44.2	44.2	44.2	32.645	56.117	6775500000	206	2.23362	0.0216193	0.495589	3.72379	Binds directly to 16S ribosomal RNA.		Plastid, chloroplast.	0.989415	0.811178	-0.140619	1.34961	0.767757	-0.739198	-0.0802995	-0.111916	-1.02461	-1.82131
AT1G80560	P93832	3-isopropylmalate dehydrogenase 2, chloroplastic	IMDH2	LEU32_ARATH	IMDH2	embryo sac development;leucine biosynthetic process;pollen development	3-isopropylmalate dehydrogenase activity;magnesium ion binding;NAD+ binding;protein homodimerization activity	chloroplast;chloroplast envelope;chloroplast stroma;plastid	18	10	10	60.2	41.2	41.2	43.37	75.433	781590000	115	1.95003	0.033379	0.701571	3.27811	catalyzes theoxidative decarboxylation step in leucine biosynthesis (primarymetabolism) (PubMed:21697089). Catalyzes the oxidation of 3-carboxy-2-hydroxy-4-methylpentanoate (3-isopropylmalate, 3-IPM) to3-carboxy-4-methyl-2-oxopentanoate. The product decarboxylates to4-methyl-2 oxopentanoate (PubMed:15849421, PubMed:20840499).Required during pollen development and involved in embryo sacdevelopment…	Expressed at low levels in seedlings,cotyledons, hypocotyls, flowers, roots, pollen, leaves and stems.{ECO:0000269|PubMed:15849421, ECO:0000269|PubMed:20840499,ECO:0000269|PubMed:21697089}.	Plastid, chloroplast stroma{ECO:0000250|UniProtKB:Q9FMT1}.	0.902906	0.89902	0.715797	0.608285	0.465363	-1.98317	0.507953	-1.32225	-0.289422	-0.504484
AT2G19860	P93834;A8MRW9	Hexokinase-2;Hexokinase	HXK2	A8MRW9_ARATH;HXK2_ARATH	HXK2	cellular glucose homeostasis;glycolytic process;hexokinase-dependent signaling;programmed cell death;sugar mediated signaling pathway	ATP binding;fructokinase activity;glucokinase activity;glucose binding;hexokinase activity;mannokinase activity	cell;cytosol;integral component of mitochondrial outer membrane;mitochondrion;plastid	17	11	11	48.8	38.8	38.8	54.489	41.756	1426900000	137	3.06974	0.00512	-0.698408	-5.17143	Fructose and glucose phosphorylating enzyme. May beinvolved in the phosphorylation of glucose during the export frommitochondrion to cytosol. Acts as sugar sensor which may regulatesugar-dependent gene repression or activation. Mediates theeffects of sugar on plant growth and development independently ofits catalytic activity or the sugar metabolism. May regulate theexecution of program cell deat…	Highly expressed in siliques, at intermediatelevels in roots and flowers, and at lower levels in stems, rosetteand cauline leaves. {ECO:0000269|PubMed:9014361}.	Mitochondrion outer membrane{ECO:0000269|PubMed:12953116, ECO:0000269|PubMed:14671022};Single-pass membrane protein {ECO:0000269|PubMed:12953116,ECO:0000269|PubMed:14671022}.	-0.97797	-0.240392	-1.31448	-1.04349	-0.585305	0.553368	0.759514	0.0474119	1.3074	1.49394
AT4G33510	Q00218;F4JIZ3	Phospho-2-dehydro-3-deoxyheptonate aldolase 2, chloroplastic	DHS2	AROG_ARATH;F4JIZ3_ARATH	DHS2	aromatic amino acid family biosynthetic process;chorismate biosynthetic process	3-deoxy-7-phosphoheptulonate synthase activity	chloroplast;chloroplast thylakoid	18	18	14	43.8	43.8	35.7	56.148	76.082	1992100000	236	4.13799	0.0024	0.661283	7.44804			Plastid, chloroplast.;Plastid, chloroplast{ECO:0000256|RuleBase:RU363071}.	1.05473	0.618302	0.380275	1.34179	1.03933	-1.07858	-0.943576	-0.771955	-0.327657	-1.31266
AT4G37980	Q02971;Q02971-2	Cinnamyl alcohol dehydrogenase 7	CAD7	CADH7_ARATH	CAD7	lignin biosynthetic process;response to bacterium	cinnamyl-alcohol dehydrogenase activity;sinapyl alcohol dehydrogenase activity;zinc ion binding		22	22	20	71.1	71.1	68.3	38.245	323.31	5878100000	425	1.88224	0.0365617	-0.458792	-3.17404	Involved in lignin biosynthesis. Catalyzes the finalstep specific for the production of lignin monomers. Catalyzes theNADPH-dependent reduction of coniferaldehyde, 5-hydroxyconiferaldehyde, sinapaldehyde, 4-coumaraldehyde andcaffeyl aldehyde to their respective alcohols	Expressed in the differentiation andelongation zones of primary and lateral roots. Expressed in thehypocotyl, cotyledon and leaf veins, hydathodes and trichomes. Instems, expressed in the vascular cambium region. Expressed in thestyle, anthers, stamen filaments, vascular tissues of sepals andstigmatic regions in flowers, and abscission, style and stigmaticregions of siliques and seed testa. {ECO:…		-0.259149	0.103233	0.0694948	-1.51851	-1.93642	0.726235	1.11334	0.792563	0.617829	0.291388
AT4G39260	Q03251;F4JVC0;F4JVC1;F4JVB9;Q03251-2	Glycine-rich RNA-binding protein 8	RBG8;CCR1	F4JVB9_ARATH;F4JVC0_ARATH;F4JVC1_ARATH;RBG8_ARATH	CCR1;RBG8	alternative mRNA splicing, via spliceosome;innate immune response;response to abscisic acid;response to cold;response to cytokinin;response to salt stress;response to zinc ion	mRNA binding;RNA binding	apoplast;cell wall;chloroplast;Golgi apparatus;nucleolus;peroxisome;plasma membrane;plasmodesma;ribonucleoprotein complex	10	7	7	66.3	58.6	58.6	16.578	323.31	2432200000	106	1.79081	0.0417264	0.243578	3.03492	Plays a role in RNA transcription or processing duringstress. Binds RNAs and DNAs sequence with a preference to single-stranded nucleic acids. Involved in mRNA alternative splicing ofnumerous targets by modulating splice site selection. Negativelyregulates the circadian oscillations of its own transcript as wellas RBG7 transcript. Forms an interlocked post-transcriptionalnegative feedback loop wi…	Ubiquitous. {ECO:0000269|PubMed:7513083}.	Cytoplasm {ECO:0000269|PubMed:17450127}.Nucleus {ECO:0000250}. Note=Shuttling between nucleus andcytoplasm. Relocalization from the cytoplasm into the nucleus ismediated by TRN1 (By similarity). {ECO:0000250}.	0.35471	-0.116375	1.50821	0.860109	0.863424	0.523115	-0.406914	-0.779439	-1.64294	-1.1639
AT4G24770	Q04836;Q04836-2;Q04836-3	31 kDa ribonucleoprotein, chloroplastic	CP31A	CP31A_ARATH	CP31A	base conversion or substitution editing;chloroplast rRNA processing;cold acclimation;innate immune response;mRNA processing;response to cold;RNA modification;RNA processing;RNA stabilization	mRNA binding;poly(U) RNA binding;RNA binding	chloroplast;chloroplast envelope;chloroplast stroma;chloroplast thylakoid membrane;ribonucleoprotein complex;thylakoid	14	14	14	46.5	46.5	46.5	35.787	323.31	18993000000	417	2.51093	0.0142	0.362164	4.17904	Required for specific RNA editing events in chloroplastsand stabilizes specific chloroplast mRNAs. Associates with the 3'-terminus ndhF mRNAs and protects them against 3'-exonucleolyticdegradation (PubMed:19297624, PubMed:23110894). Required fornormal chloroplast development under cold stress conditions bystabilizing transcripts of numerous mRNAs under these conditions(PubMed:23110894). May modul…		Plastid, chloroplast{ECO:0000269|PubMed:17450127}.	1.45935	0.127182	0.446511	0.62933	1.26589	-0.866471	-0.232969	-0.0838143	-1.17685	-1.56817
AT1G07890	Q05431;F4HU93	L-ascorbate peroxidase 1, cytosolic	APX1	APX1_ARATH;F4HU93_ARATH	APX1	cellular response to oxidative stress;embryo development ending in seed dormancy;hydrogen peroxide catabolic process;response to cadmium ion;response to cytokinin;response to heat;response to oxidative stress;response to reactive oxygen species;response to salt stress	heme binding;L-ascorbate peroxidase activity;metal ion binding;peroxidase activity	cell wall;chloroplast;chloroplast stroma;cytosol;Golgi apparatus;plasma membrane;plasmodesma	22	22	22	88.4	88.4	88.4	27.561	323.31	25456000000	430	3.95696	0.00216667	-0.551951	-7.01996	Plays a key role in hydrogen peroxide removal.Constitutes a central component of the reactive oxygen genenetwork.	Predominantly expressed in flowers.{ECO:0000269|PubMed:9808745}.	Cytoplasm.	-1.50293	-0.473094	-0.673329	-0.916415	-0.833949	0.303831	0.810753	1.01562	1.42823	0.841288
AT3G58610	Q05758	Ketol-acid reductoisomerase, chloroplastic		ILV5_ARATH		branched-chain amino acid biosynthetic process;isoleucine biosynthetic process;response to cadmium ion;valine biosynthetic process	copper ion binding;ketol-acid reductoisomerase activity	apoplast;cell wall;chloroplast;chloroplast envelope;chloroplast stroma;mitochondrion;plastid	25	25	25	53.8	53.8	53.8	63.812	323.31	7907300000	490	1.85399	0.0378804	0.427973	3.13091			Plastid, chloroplast {ECO:0000305}.	1.39275	0.0660049	-0.103933	0.827798	1.3372	-0.678138	-0.0926762	0.0405672	-1.07014	-1.71943
AT5G52310	Q06738	Low-temperature-induced 78 kDa protein	LTI78	RD29A_ARATH	RD29A	circadian rhythm;hyperosmotic salinity response;leaf senescence;regulation of root development;response to abscisic acid;response to cold;response to mannitol;response to osmotic stress;response to reactive oxygen species;response to salt;response to salt stress;response to symbiotic bacterium;response to water deprivation;response to wounding		cytoplasm	33	33	33	83.1	83.1	83.1	77.855	273.18	5320400000	349	2.82309	0.00836923	-1.56651	-4.71966	Involved in responses to abiotic stresses(PubMed:21374086). Regulates probably root elongation in coldconditions (PubMed:19470100).	Accumulates rapidly in leaves, stems, roots,flower petals, filaments, and sepals during cold-acclimation.{ECO:0000269|PubMed:1830821, ECO:0000269|PubMed:8290624}.	Cytoplasm {ECO:0000269|PubMed:21374086}.	-1.74331	-0.111032	-0.280417	-1.21582	-0.718149	0.535821	1.36887	0.875875	0.400961	0.887204
AT2G37770	Q0PGJ6;Q0PGJ6-2	Aldo-keto reductase family 4 member C9	AKR4C9	AKRC9_ARATH	AKR4C9	oxidation-reduction process;response to cold;response to salt stress;response to toxic substance;response to water deprivation	alcohol dehydrogenase (NADP+) activity;alditol:NADP+ 1-oxidoreductase activity;aldo-keto reductase (NADP) activity;NADP+ binding;oxidoreductase activity;steroid dehydrogenase activity	chloroplast;cytosol	7	6	6	31.4	28.3	28.3	35.136	21.357	96040000	17	2.01474	0.0292358	1.11864	3.37827	Oxidoreductase acting on a broad range of substrates:reduces ketosteroids, aromatic aldehydes, ketones, sugars andother aliphatic aldehydes, and oxidizes hydroxysteroids(PubMed:19616008). Aldehyde reductase that catalyzes the reductionof the aldehyde carbonyl groups on saturated and alpha,beta-unsaturated aldehydes (PubMed:21169366). No activity onalpha,beta-unsaturated ketones (PubMed:21169366).…		Plastid, chloroplast{ECO:0000269|PubMed:21169366}.	0.875694	0.23064	1.23942	1.08868	0.20256	-1.0543	-0.903175	-1.80031	0.408143	-0.287349
AT3G11130	Q0WNJ6	Clathrin heavy chain 1	CHC1	CLAH1_ARATH	CHC1	clathrin coat assembly;clathrin-dependent endocytosis;endocytosis;intracellular protein transport;receptor-mediated endocytosis;stomatal movement;vesicle-mediated transport	clathrin light chain binding;structural molecule activity	chloroplast;clathrin coat of coated pit;clathrin coat of trans-Golgi network vesicle;clathrin complex;cytosol;Golgi apparatus;plasma membrane;plasmodesma;vacuolar membrane;vacuole	79	79	15	56.5	56.5	14.7	193.24	323.31	22322000000	1213	2.58925	0.0126218	-0.235364	-4.31168	Clathrin is the major protein of the polyhedral coat ofcoated pits and vesicles (By similarity). Mediates endocytosis andis required for a correct polar distribution of PIN auxintransporters.		Cytoplasmic side {ECO:0000250}.Note=Cytoplasmic face of coated pits and vesicles. {ECO:0000250}.; Cytoplasmic side{ECO:0000250}. Membrane, coated pit {ECO:0000250}; Peripheralmembrane protein {ECO:0000250};Cytoplasmic vesicle membrane {ECO:0000250};Peripheral membrane protein {ECO:0000250}	-0.830317	-0.4119	-0.0714464	-0.831962	-1.82057	1.40004	0.825593	1.14379	0.322388	0.274382
AT1G09850	Q0WVJ5		XBCP3	Q0WVJ5_ARATH	XBCP3	proteolysis involved in cellular protein catabolic process	cysteine-type endopeptidase activity	endoplasmic reticulum;extracellular space;lysosome;vacuole	4	4	4	13.7	13.7	13.7	48.073	5.4652	162780000	24	1.82998	0.039064	-0.910069	-3.09435				-1.17784	0.268433	0.435874	-1.30547	-1.72216	0.324561	0.883703	0.811677	0.879253	0.601976
AT4G14090	Q0WW21	UDP-glycosyltransferase 75C1	UGT75C1	U75C1_ARATH	UGT75C1	anthocyanin-containing compound biosynthetic process;phenylpropanoid metabolic process	anthocyanin 5-O-glucosyltransferase activity;quercetin 3-O-glucosyltransferase activity;quercetin 7-O-glucosyltransferase activity;UDP-glucosyltransferase activity;UDP-glycosyltransferase activity	intracellular membrane-bounded organelle	3	3	3	11.6	11.6	11.6	50.702	25.689	248370000	12	2.12248	0.0245241	-2.06715	-3.54699	Catalyzes the glycosylation of anthocyanins from UDP-glucose.			-0.818029	-0.892833	-0.0308429	-0.610064	-1.35689	-0.620085	0.928705	0.7591	1.25375	1.38719
AT1G09210	Q38858	Calreticulin-2	CRT2	CALR2_ARATH	CRT2	protein folding;response to oxidative stress;response to salt stress	calcium ion binding;carbohydrate binding;unfolded protein binding	apoplast;endoplasmic reticulum;endoplasmic reticulum lumen;mitochondrion;vacuole	19	13	13	48.8	34.9	34.9	48.156	82.761	2327100000	168	2.08559	0.0265937	-0.24847	-3.48893	Molecular calcium-binding chaperone promoting folding,oligomeric assembly and quality control in the ER via thecalreticulin/calnexin cycle. This lectin may interact transientlywith almost all of the monoglucosylated glycoproteins that aresynthesized in the ER (By similarity).		Endoplasmic reticulum lumen{ECO:0000255|PROSITE-ProRule:PRU10138}.	-0.241209	0.0611707	-0.266213	-1.65067	-1.58778	-0.0335168	1.12068	0.72094	0.733543	1.14306
AT3G15730	Q38882;A0A1P8BEI1;P58766	Phospholipase D alpha 1	PLDALPHA1	PLDA1_ARATH	PLDALPHA1	abscisic acid-activated signaling pathway;ethylene-activated signaling pathway;fatty acid metabolic process;leaf shaping;lipid catabolic process;phosphatidylcholine metabolic process;positive regulation of abscisic acid-activated signaling pathway;regulation of stomatal movement;response to abscisic acid;response to cadmium ion;seed germination	calcium ion binding;GTPase activator activity;N-acylphosphatidylethanolamine-specific phospholipase D activity;phosphatidylinositol-4,5-bisphosphate binding;phospholipase activity;phospholipase D activity	chloroplast;clathrin-coated vesicle;cytosol;endoplasmic reticulum;membrane;mitochondrial membrane;mitochondrion;nucleus;plasma membrane;plasmodesma;vacuole	43	43	35	70.7	70.7	62	91.847	323.31	25949000000	903	3.67392	0.00268571	-0.434256	-6.38779	Hydrolyzes glycerol-phospholipids at the terminalphosphodiesteric bond to generate phosphatidic acids (PA). Playsan important role in various cellular processes, includingphytohormone action and response to stress, characterized byacidification of the cell (PubMed:9437863). Involved in woundinduction of jasmonic acid (PubMed:11090221). May be involved inmembrane lipid remodeling (PubMed:11239826)…	Highly expressed in roots, stems and flowers,moderately in leaves, seedlings and siliques. Not detected inseeds. {ECO:0000269|PubMed:10198096}.	Cytoplasm {ECO:0000269|PubMed:10198096,ECO:0000269|PubMed:11706190}. Cell membrane{ECO:0000269|PubMed:10198096, ECO:0000269|PubMed:11706190};Peripheral membrane protein {ECO:0000269|PubMed:10198096}.Mitochondrion membrane {ECO:0000269|PubMed:11706190}. Microsomemembrane {ECO:0000269|PubMed:11706190}. Vacuole{ECO:0000269|PubMed:10198096}. Cytoplasmic vesicle, clathrin-coated vesicle {ECO:0000269|P…	-0.849673	-0.269588	-0.563913	-1.5012	-1.15288	0.430483	0.606011	1.13844	1.32429	0.838034
AT3G04870	Q38893	Zeta-carotene desaturase, chloroplastic/chromoplastic	ZDS1	ZDS_ARATH	ZDS1	9,9'-di-cis-zeta-carotene desaturation to 7,9,7',9'-tetra-cis-lycopene;carotene biosynthetic process;carotenoid biosynthetic process;lycopene biosynthetic process	7,9,9'-tricis-neurosporene:quinone oxidoreductase activity;9,9'-dicis-carotene:quinone oxidoreductase activity;carotene 7,8-desaturase activity;oxidoreductase activity	chloroplast;chloroplast envelope;chromoplast	17	17	17	35.7	35.7	35.7	61.633	94.222	1311800000	158	4.28543	0.00193103	0.41967	7.81141	Plays a crucial role in plant growth and development. Isessential for the biosynthesis of carotenoids. Carotenoids areinvolved in different physiological processes, includingcoloration, photoprotection, biosynthesis of abscisic acid (ABA)and chloroplast biogenesis (PubMed:17468780, PubMed:24907342).Catalyzes the conversion of zeta-carotene to lycopene via theintermediary of neurosporene. It carri…	Highly expressed in leaves. Expressed at lowlevels in flowers and siliques. {ECO:0000269|PubMed:17468780}.	Plastid, chloroplast. Plastid, chromoplast{ECO:0000305}.	1.17495	0.749524	0.79703	0.417131	1.32141	-1.50165	-0.614483	-0.724957	-0.679632	-0.93932
AT4G01370	Q39024;Q9LMM5;A0A1P8ASZ4;Q9LMM5-2;A0A1P8BBW2;Q9SR87;A0A2H1ZE50;A0A1P8BAS9;A0A1P8BBV6;Q9LYX1;Q9FIF0;Q66GN2;A0A1I9LTB8;Q9M020;Q9FHG4;Q9M021;Q9LSL5;Q9FIF1;Q9FG33;Q9LXA5;O48837	Mitogen-activated protein kinase 4	MPK4	MPK4_ARATH	MPK4	cortical microtubule organization;cytokinesis by cell plate formation;hyperosmotic response;hypotonic salinity response;intracellular signal transduction;jasmonic acid and ethylene-dependent systemic resistance;jasmonic acid and ethylene-dependent systemic resistance, jasmonic acid mediated signaling pathway;male meiosis cytokinesis;phosphorylation;pollen development;protein phosphorylation;regul…	ATP binding;kinase activity;MAP kinase activity;protein kinase activity	cell plate;cytoplasm;cytosol;microtubule;nucleus	9	8	6	31.9	27.7	22.1	42.851	70.147	548300000	95	2.67274	0.0110179	-0.381223	-4.45522	The ANPs-MKK6-MPK4 module is involved in the regulationof plant cytokinesis during meiosis and mitosis. Essential topromote the progression of cytokinesis and for cellularization(formation of the cell plate) during male-specific meiosis.Involved in cortical microtubules organization and stabilizationby regulating the phosphorylation state of microtubule-associatedproteins such as MAP65-1. Involve…	Ubiquitous. Expressed in the veins andstomatal guard cells of leaf plates, petioles, stem, roots andflowers. {ECO:0000269|PubMed:11163186,ECO:0000269|PubMed:20215588, ECO:0000269|PubMed:21575092}.	Cytoplasm. Nucleus. Cytoplasm, cytoskeleton.Note=Translocated into the nucleus in response to phosphorylation(Probable). Localized to the cell plate. {ECO:0000305}.	-1.37828	-1.27841	-0.896938	-0.00954425	-0.441396	1.52686	0.885303	0.463765	0.0645481	1.06409
AT1G12240	Q39041;A0A1P8AWL7;A0A1P8AWQ1;Q43348	Acid beta-fructofuranosidase 4, vacuolar	BFRUCT4	INVA4_ARATH	BFRUCT4	abscisic acid-activated signaling pathway;cellular response to gibberellin stimulus;primary root development;response to bacterium;sucrose metabolic process	beta-fructofuranosidase activity;sucrose alpha-glucosidase activity	endoplasmic reticulum membrane;Golgi membrane;integral component of membrane;late endosome membrane;plant-type cell wall;plant-type vacuole;vacuolar lumen;vacuolar membrane;vacuole	11	11	11	21.4	21.4	21.4	73.843	140.39	616350000	95	3.26526	0.00359664	1.36744	5.54693	Possible role in the continued mobilization of sucroseto sink organs (PubMed:20207708). Regulates root elongation(PubMed:16481625).	Mostly expressed in stems, roots and flowers,and, to a lower extent, in mature leaves.{ECO:0000269|PubMed:9332372}.	Single-pass type II membrane protein. Vacuole lumen{ECO:0000269|PubMed:21899678, ECO:0000269|PubMed:23737500}.Note=Located in the lytic vacuole but not in the protein storagevacuole. Remains inserted into membranes on its way to the lyticvacuole, following the classical sorting pathway from theendoplasmic reticulum. Released into the lumen of the vacuole fromthe tonoplast through a proteolytic pr…	0.476232	0.949938	0.178358	1.58043	1.04081	-0.612838	-1.07828	-0.982148	-0.251846	-1.30065
AT3G19820	Q39085	Delta(24)-sterol reductase	DIM	DIM_ARATH	DIM	brassinosteroid biosynthetic process;lignin metabolic process;plant-type secondary cell wall biogenesis;steroid metabolic process;unidimensional cell growth	calmodulin binding;delta24-sterol reductase activity;FAD binding;oxidoreductase activity, acting on the CH-CH group of donors, NAD or NADP as acceptor	cytoplasm;endoplasmic reticulum;integral component of membrane;membrane;plasma membrane;vacuolar membrane;vacuole	12	12	12	23	23	23	65.393	50.519	1034100000	167	2.07829	0.0271318	0.572022	3.47748	Plays a critical role in the general process of plantcell elongation. Involved in the synthesis of campesterol, anearly precursor of brassinolide. Required for the conversion of24-methylenecholesterol to campesterol and for the conversion ofisofucosterol to sitosterol. Necessary for both the isomerizationand reduction of 24-methylenecholesterol. Regulate indirectlyphytochrome-mediated light respo…		Cytoplasmic side{ECO:0000269|PubMed:9761794}.; Single-pass type II membrane protein{ECO:0000269|PubMed:9761794};Microsome membrane{ECO:0000269|PubMed:9761794}	0.976422	1.09125	0.415712	0.108328	1.08818	0.0768872	-0.299769	-0.354652	-1.07514	-2.02721
AT5G01600	Q39101	Ferritin-1, chloroplastic	FER1	FRI1_ARATH	FER1	flower development;intracellular sequestering of iron ion;iron ion homeostasis;iron ion transport;leaf development;photosynthesis;response to bacterium;response to cold;response to cytokinin;response to hydrogen peroxide;response to iron ion;response to reactive oxygen species;response to zinc ion	ferric iron binding;ferrous iron binding;ferroxidase activity;identical protein binding;iron ion binding;protein domain specific binding	chloroplast;chloroplast envelope;chloroplast stroma;chloroplast thylakoid membrane;cytoplasm;membrane;mitochondrion;thylakoid	8	8	8	47.1	47.1	47.1	28.178	51.822	999290000	79	2.82139	0.00846939	-3.03078	-4.71663	Stores iron in a soluble, non-toxic, readily availableform. Important for iron homeostasis. Has ferroxidase activity.Iron is taken up in the ferrous form and deposited as ferrichydroxides after oxidation (By similarity).		Plastid, chloroplast.	-1.37018	-0.357635	-0.0736193	-0.449298	-1.8173	0.801551	1.15968	0.645688	0.811623	0.649493
AT4G32940	Q39119	Vacuolar-processing enzyme gamma-isozyme		VPEG_ARATH		leaf senescence;proteolysis involved in cellular protein catabolic process;response to ethylene;response to jasmonic acid;response to salicylic acid;response to wounding;vacuolar protein processing	cysteine-type endopeptidase activity;endopeptidase activity	lytic vacuole;protein storage vacuole	7	7	7	20.6	20.6	20.6	54.335	206.96	798160000	79	2.16608	0.022978	-0.89534	-3.616	Asparagine-specific endopeptidase involved in theprocessing of vacuolar seed protein precursors into the matureforms (PubMed:10417725). Probably involved in post-translationalproteolysis of seed storage proteins in the protein storagevacuole of developing seeds (PubMed:14688293)	Specific to vegetative organs, especially insenescent tissues. Also expressed in seeds and root tips.{ECO:0000269|PubMed:10417725, ECO:0000269|PubMed:14688293}.	Vacuole {ECO:0000269|PubMed:8589932}. Lyticvacuole {ECO:0000269|PubMed:10417725}. Note=Localized in lyticvacuoles of wounded leaves. {ECO:0000269|PubMed:10417725}.	-1.70356	0.335611	-0.164728	-1.62532	-0.578219	1.04496	0.533899	0.81475	0.529811	0.812785
AT2G34420	Q39141		Lhb1B2	Q39141_ARATH	Lhb1B2	photosynthesis, light harvesting in photosystem I;protein-chromophore linkage;response to light stimulus	chlorophyll binding;protein domain specific binding	chloroplast;chloroplast thylakoid;chloroplast thylakoid membrane;integral component of membrane;membrane;photosystem I;photosystem II;plastoglobule;thylakoid	22	22	1	92.5	92.5	5.3	28.054	323.31	686830000000	2203	2.28192	0.0198344	-0.356646	-3.80157	The light-harvesting complex (LHC) functions as a lightreceptor, it captures and delivers excitation energy tophotosystems with which it is closely associated		Plastid, chloroplast thylakoid membrane{ECO:0000256|RuleBase:RU363080, ECO:0000256|SAAS:SAAS00625777}.	-1.25099	0.421828	-1.00434	-0.777934	-1.1942	1.52224	0.246014	1.11644	0.169912	0.751036
AT5G16970	Q39172;Q9LFK5	NADP-dependent alkenal double bond reductase P1	P1	AER_ARATH	AER	response to cadmium ion;response to oxidative stress	2-alkenal reductase [NAD(P)] activity	cytosol;nucleoplasm;nucleus	21	21	12	73.6	73.6	40.9	38.133	187.45	5248700000	425	5.31788	0	0.668897	10.7866	Involved in the detoxification of reactive carbonyls(PubMed:10848984, PubMed:12514241, PubMed:16299173). Acts on lipidperoxide-derived reactive aldehydes (PubMed:12514241). Specific toa double bond activated by an adjacent carbonyl group(PubMed:12514241). Can use both quinones and diamide assubstrates, but not menadione, ferricyanide or phylloquinone(PubMed:10848984). Can use 4-hydroxy-(2E)-nonen…	Expressed in leaves.{ECO:0000269|PubMed:16299173}.	Cytoplasm {ECO:0000269|PubMed:16299173}.Nucleus, nucleoplasm {ECO:0000269|PubMed:16299173}.	0.802675	1.04831	0.647641	1.0214	1.06827	-1.43754	-0.825577	-0.9567	-0.521277	-0.847207
AT1G06680	Q42029;Q42029-2;O49344	Oxygen-evolving enhancer protein 2-1, chloroplastic	PSBP1	PSBP1_ARATH	PSBP1	defense response to bacterium;photosynthesis, light reaction	calcium ion binding;poly(U) RNA binding;protein domain specific binding	apoplast;chloroplast;chloroplast envelope;chloroplast stroma;chloroplast thylakoid;chloroplast thylakoid lumen;chloroplast thylakoid membrane;extrinsic component of membrane;photosystem II oxygen evolving complex;thylakoid;thylakoid lumen	17	17	17	50.6	50.6	50.6	28.095	323.31	168000000000	2953	3.37998	0.00306542	-0.493929	-5.77501	May be involved in the regulation of photosystem II.		Plastid, chloroplast thylakoid lumen{ECO:0000269|PubMed:11719511, ECO:0000269|PubMed:18431481}.Note=Associated with the photosystem II complex.	-0.722349	-0.519171	-0.792308	-1.49233	-0.733772	1.72817	0.382438	0.427629	0.766935	0.954755
AT1G65960	Q42472;Q56W28;Q9LSH2;A0A1P8AZ64;Q9ZPS3;Q42521	Glutamate decarboxylase 2;Glutamate decarboxylase	GAD2	DCE2_ARATH;Q56W28_ARATH	GAD2	glutamate catabolic process;glutamate metabolic process;nitrogen compound metabolic process	calmodulin binding;glutamate decarboxylase activity;pyridoxal phosphate binding	cytosol	30	30	27	67	67	62.1	56.14	323.31	9936100000	536	3.35997	0.00313514	-0.488188	-5.73479	Catalyzes the production of GABA. The calmodulin-bindingis calcium-dependent and it is proposed that this may, directly orindirectly, form a calcium regulated control of GABA biosynthesis	Expressed in roots, inflorescence stems,flowers, siliques and leaves. {ECO:0000269|PubMed:18077464,ECO:0000269|PubMed:9700069, ECO:0000269|PubMed:9701597}.		-0.481642	-0.950398	-0.319255	-0.950398	-1.55245	0.942658	1.59051	0.733341	0.546994	0.440633
AT4G23650	Q42479	Calcium-dependent protein kinase 3	CPK3	CDPK3_ARATH	CPK3	abscisic acid-activated signaling pathway;intracellular signal transduction;peptidyl-serine phosphorylation;protein autophosphorylation;regulation of anion channel activity;regulation of stomatal movement;response to salt stress	ATP binding;calcium ion binding;calcium-dependent protein serine/threonine kinase activity;calmodulin binding;calmodulin-dependent protein kinase activity;protein kinase activity;protein serine/threonine kinase activity	cytoplasm;cytosol;membrane;nucleus;plasma membrane;vacuole	18	18	18	35.7	35.7	35.7	59.336	102.39	1601100000	162	2.16681	0.0229752	-0.434457	-3.61715	May play a role in signal transduction pathways thatinvolve calcium as a second messenger. Functions in abscisic acid(ABA) regulation of guard cell S-type anion-and Ca(2+)-permeablechannels and stomatal closure.	Expressed in both guard cells and mesophyllcells. {ECO:0000269|PubMed:17032064}.	Cytoplasm {ECO:0000269|PubMed:12913141}.Nucleus {ECO:0000269|PubMed:12913141}.	0.17387	-0.622235	-1.30371	-1.16561	-0.818973	0.702441	1.01604	0.85215	1.56328	-0.397249
AT5G55280	Q42545	Cell division protein FtsZ homolog 1, chloroplastic	FTSZ1	FTSZ1_ARATH	FTSZ1	cell cycle;cell division;chloroplast fission;chloroplast organization;chloroplast relocation;microtubule-based process;plastid fission;response to blue light	GTP binding;GTPase activity;identical protein binding;protein self-association	cell division site;chloroplast;chloroplast stroma;chloroplast thylakoid membrane;cytoplasm;microtubule	13	13	13	45.3	45.3	45.3	45.564	243.83	1511100000	153	4.0458	0.00190909	0.517416	7.22764	Exhibits GTPase activity. Component of the plastiddivision machinery that forms a contractile ring at the divisionsite. Required for plastid division in a dose-dependent manner.Involved in blue light-induced chloroplast movements. May regulatethylakoid development.	In pollen grain, restricted to plastids ofvegetative cells. Also present in pollen tubes plastids.{ECO:0000269|PubMed:20195657}.	Peripheral membraneprotein. Note=Forms a contractile ring at the chloroplast midpointthat coaligns with FTSZ2-1 rings.;Plastid, chloroplast stroma{ECO:0000269|PubMed:18431481}. Plastid, chloroplast thylakoidmembrane {ECO:0000269|PubMed:18431481}	1.03878	1.29504	0.393019	1.04644	0.643936	-1.55468	-0.690505	-0.593815	-0.57961	-0.998616
AT1G20620	Q42547;B9DG18;A0A1P8AWT7;F4HUL6;Q2V4M4;A0A1P8AWR0	Catalase-3	CAT3	A0A1P8AWR0_ARATH;A0A1P8AWT7_ARATH;B9DG18_ARATH;CATA3_ARATH;F4HUL6_ARATH;Q2V4M4_ARATH	CAT3	cellular response to nitrogen starvation;cellular response to phosphate starvation;cellular response to sulfate starvation;hydrogen peroxide catabolic process;response to cadmium ion;response to cold;response to hydrogen peroxide;response to light stimulus;response to oxidative stress	catalase activity;cobalt ion binding;heme binding;metal ion binding;mRNA binding	apoplast;cell wall;chloroplast;chloroplast envelope;chloroplast stroma;cytosolic ribosome;integral component of membrane;membrane;mitochondrion;peroxisome;plasma membrane;plasmodesma;vacuole	37	37	28	77.2	77.2	62.2	56.695	323.31	109270000000	878	3.28775	0.00338462	-0.650689	-5.59118	Occurs in almost all aerobically respiring organisms andserves to protect cells from the toxic effects of hydrogenperoxide.		Peroxisome {ECO:0000269|PubMed:25700484}.	-1.26121	-0.254322	-0.108216	-1.27166	-1.33724	0.554817	1.2765	0.807078	0.612535	0.981719
AT4G35000	Q42564	L-ascorbate peroxidase 3, peroxisomal	APX3	APX3_ARATH	APX3	cellular response to oxidative stress;hydrogen peroxide catabolic process;response to cytokinin;response to oxidative stress;response to reactive oxygen species	heme binding;L-ascorbate peroxidase activity;metal ion binding;peroxidase activity	chloroplast;chloroplast envelope;glyoxysomal membrane;integral component of membrane;mitochondrion;peroxisomal membrane;peroxisome;plasmodesma;plastid;vacuolar membrane;vacuole	11	11	11	59.9	59.9	59.9	31.571	93.295	2081200000	155	1.78042	0.0426284	0.392807	3.0192	Plays a key role in hydrogen peroxide removal		Single-passmembrane protein {ECO:0000269|PubMed:16873450}.;Peroxisome membrane{ECO:0000269|PubMed:16873450, ECO:0000269|PubMed:20215589};Single-pass membrane protein {ECO:0000269|PubMed:16873450}.Glyoxysome membrane {ECO:0000269|PubMed:16873450}	1.65292	0.543768	-0.174178	0.958368	0.480802	-0.377343	-1.6442	-0.968873	0.433932	-0.905194
AT5G18170	Q43314	Glutamate dehydrogenase 1	GDH1	DHE1_ARATH	GDH1	cellular amino acid metabolic process;nitrogen compound metabolic process;response to absence of light;response to cadmium ion;response to salt stress	ATP binding;cobalt ion binding;copper ion binding;glutamate dehydrogenase [NAD(P)+] activity;zinc ion binding	mitochondrion	21	21	12	60.6	60.6	41.6	44.524	77.27	4479700000	321	2.07449	0.0271077	-0.248288	-3.47153				-1.37658	-0.217575	0.312354	-1.09023	-1.30535	1.08327	-0.257305	0.996615	1.16669	0.688107
AT3G53460	Q43349;Q43349-2;F4JAF3	29 kDa ribonucleoprotein, chloroplastic	CP29A;CP29	CP29A_ARATH;F4JAF3_ARATH	CP29;CP29A	chloroplast rRNA processing;cold acclimation;mRNA processing;response to cold;RNA processing;RNA splicing;RNA stabilization	mRNA binding;poly(U) RNA binding;RNA binding	chloroplast;chloroplast stroma;chloroplast thylakoid;chloroplast thylakoid membrane;ribonucleoprotein complex;thylakoid	11	8	8	37.7	34.8	34.8	36.007	145.18	807590000	100	2.53714	0.0135276	0.972823	4.22321	Stabilizes specific chloroplast mRNAs. Required fornormal chloroplast development under cold stress conditions bystabilizing transcripts of numerous mRNAs under these conditions		Plastid, chloroplast {ECO:0000305}.	1.01209	0.573404	-0.223758	1.16449	1.41495	-1.11867	-0.315795	-1.12454	-1.26891	-0.113259
AT5G37600	Q56WN1	Glutamine synthetase cytosolic isozyme 1-1	GLN1-1	GLN11_ARATH	GLN1-1	glutamine biosynthetic process;leaf senescence;nitrate assimilation	ATP binding;copper ion binding;glutamate-ammonia ligase activity	cell wall;cytosol;cytosolic ribosome;plasma membrane;plasmodesma	15	7	4	46.1	25.6	17.4	39.115	90.686	2346400000	86	2.27886	0.0199114	-0.516658	-3.79662	High-affinity glutamine synthetase. May contribute tothe homeostatic control of glutamine synthesis in roots.	Expressed in root tips, root hairs andepidermis. Ubiquitously expressed with higher levels in siliquesand roots. {ECO:0000269|PubMed:14757761,ECO:0000269|PubMed:16472779}.	Cytoplasm {ECO:0000269|PubMed:16472779}.	-0.963549	0.232017	-0.56437	-1.18445	-1.32352	1.11028	-0.318212	1.06169	1.27669	0.673415
AT2G13360	Q56YA5	Serine--glyoxylate aminotransferase	AGT1	SGAT_ARATH	AGT1	glycine biosynthetic process, by transamination of glyoxylate;photorespiration	alanine-glyoxylate transaminase activity;serine-glyoxylate transaminase activity;serine-pyruvate transaminase activity	apoplast;chloroplast;chloroplast stroma;membrane;peroxisome;plasma membrane	25	25	25	85.8	85.8	85.8	44.207	323.31	39448000000	776	3.04704	0.00509091	0.504104	5.12887	Photorespiratory enzyme that catalyzes transaminationreactions with multiple substrates, including asparagine. Functionexclusively as a catabolic enzyme in Asn metabolism	Ubiquitous. Preferentially expressed in green,leafy tissues, root cortex and epidermis, developing siliques anddry seeds. {ECO:0000269|PubMed:11309139,ECO:0000269|PubMed:23098902}.	Peroxisome {ECO:0000269|PubMed:11309139}.	1.52874	0.291429	0.26016	0.904856	1.16848	-1.04965	-1.33332	-0.60715	-0.133922	-1.02963
AT3G24503	Q56YU0	Aldehyde dehydrogenase family 2 member C4	ALDH2C4	AL2C4_ARATH	ALDH2C4	phenylpropanoid biosynthetic process	aldehyde dehydrogenase (NAD) activity;coniferyl-aldehyde dehydrogenase activity;glyceraldehyde-3-phosphate dehydrogenase (NAD+) (non-phosphorylating) activity	cytosol	22	22	22	58.1	58.1	58.1	54.36	238.5	3768700000	370	2.59657	0.0123376	-0.265387	-4.32416	Involved in ferulic acid and sinapic acid biosynthesisby oxidation of conyferylaldehyde and sinapaldehyde, respectively.Can oxidize L-lactaldehyde. Possesses activity on acetaldehyde andglycolaldehyde in vitro.		Cytoplasm, cytosol {ECO:0000305}.	-0.894978	-0.622928	-0.208833	-1.20541	-1.03749	0.293054	1.5814	1.07856	-0.188543	1.20517
AT2G14720	Q56ZQ3;F4IMR9;O22925	Vacuolar-sorting receptor 4	VSR4	VSR4_ARATH	VSR4	Golgi to vacuole transport;protein targeting to vacuole;ubiquitin-dependent protein catabolic process	calcium ion binding;ubiquitin protein ligase activity	clathrin-coated vesicle membrane;endosome;Golgi apparatus;Golgi membrane;Golgi transport complex;integral component of membrane;late endosome membrane;membrane;trans-Golgi network;vacuole	13	13	4	28.7	28.7	6.2	69.812	25.142	1063800000	102	1.84116	0.0384534	-0.302745	-3.11136	Vacuolar-sorting receptor (VSR) involved in clathrin-coated vesicles sorting from Golgi apparatus to vacuoles	Expressed at low levels in seeds, seedlings,roots, stems, leaves, flowers and siliques.{ECO:0000269|PubMed:10561538, ECO:0000269|PubMed:12493849}.	Single-pass type I membrane protein {ECO:0000250}.Cytoplasmic vesicle, clathrin-coated vesicle membrane{ECO:0000250}; Single-pass type I membrane protein {ECO:0000250}.Prevacuolar compartment membrane {ECO:0000250}; Single-pass type Imembrane protein {ECO:0000250}.; Single-pass type Imembrane protein {ECO:0000250}. Golgi apparatus membrane{ECO:0000250};Membrane {ECO:0000250}	-0.508702	-0.760586	-1.68835	0.295643	-0.847897	0.524972	-0.469606	1.1812	1.01313	1.26019
AT5G28850;AT5G28900	Q8VZQ4;Q5QIT3;Q5QIT3-2;A0A1P8AMG0;A0A1P8AMC2;Q84JI6-2;Q9SLI8	Probable serine/threonine protein phosphatase 2A regulatory subunit Bgamma;Serine/threonine protein phosphatase 2A regulatory subunit Bbeta	BGAMMA;BBETA	2AB2B_ARATH;2AB2C_ARATH	B''BETA;B''GAMMA	protein dephosphorylation	calcium ion binding;protein phosphatase regulator activity	cytoplasm;cytosol;nucleus;protein phosphatase type 2A complex	5	5	3	11.9	11.9	9	62.018	18.967	275470000	53	2.27663	0.0198742	0.564087	3.79302	Probable regulatory subunit of type 2A proteinphosphatase.;Regulatory subunit of type 2A protein phosphatase.Involved in post-transcriptional regulation of HMGR but not inroot growth regulation in response to salt		Cytoplasm {ECO:0000269|PubMed:15610358}.Nucleus {ECO:0000269|PubMed:15610358}.	0.977443	1.388	0.39591	1.26288	-0.22165	-0.767479	-0.165209	-0.176236	-1.49184	-1.20181
AT5G45930	Q5XF33	Magnesium-chelatase subunit ChlI-2, chloroplastic	CHLI2	CHLI2_ARATH	CHLI2	chlorophyll biosynthetic process;photosynthesis;response to cytokinin	ATP binding;ATPase activity;magnesium chelatase activity	chloroplast;chloroplast stroma;magnesium chelatase complex	18	8	8	55.5	25.1	25.1	46.097	42.264	319260000	50	2.08974	0.0264503	1.76174	3.49545	Involved in chlorophyll biosynthesis. Catalyzes theinsertion of magnesium ion into protoporphyrin IX to yield Mg-protoporphyrin IX. The reaction takes place in two steps, with anATP-dependent activation followed by an ATP-dependent chelationstep. Possesses low affinity for ATP and may play a limited rolein chlorophyll biosynthesis, and contributes to the assembly ofthe Mg-chelatase complex.	Expressed in leaves.{ECO:0000269|PubMed:11842180}.	Plastid, chloroplast{ECO:0000305|PubMed:18846282}.	1.12434	0.425355	0.715702	0.530351	0.891676	0.251287	-0.577106	-2.02254	-0.129669	-1.2094
AT5G45170	Q6NMA9;A0A1P8BBQ8		At5g45170	A0A1P8BBQ8_ARATH;Q6NMA9_ARATH			hydrolase activity	chloroplast;chloroplast stroma	13	13	13	48.4	48.4	48.4	40.741	120.65	1512800000	218	2.01572	0.0294062	0.180837	3.3798				1.78393	0.0449962	0.190533	-0.0331513	1.65136	-1.01443	-0.250298	-1.02246	-0.642662	-0.707825
AT3G27020	Q6R3K6	Probable metal-nicotianamine transporter YSL6	YSL6	YSL6_ARATH	YSL6	transmembrane transport		integral component of membrane;vacuolar membrane	2	2	2	5.6	5.6	5.6	73.573	13.89	108320000	20	1.72351	0.0463956	-0.725186	-2.93335	May be involved in the transport of nicotianamine-chelated metals.		Multi-pass membraneprotein {ECO:0000305}.;Membrane {ECO:0000305}	-0.972808	-0.121436	-0.879309	-1.97702	0.535962	0.357576	0.499723	1.43464	0.517307	0.605371
AT3G24430	Q6STH5	Fe-S cluster assembly factor HCF101, chloroplastic	HCF101	HF101_ARATH	HCF101	iron-sulfur cluster assembly	4 iron, 4 sulfur cluster binding;ATP binding;iron-sulfur cluster binding;metal ion binding	chloroplast;chloroplast stroma	15	15	15	46.8	46.8	46.8	57.764	53.323	2681600000	175	2.68193	0.0108649	0.592721	4.47115	Required for photosystem I (PSI) biosynthesis andassembly. May serve as a chloroplast scaffold protein thatspecifically assembles iron-sulfur (4Fe-4S) clusters and transfersthem to the chloroplast PSI and ferredoxin-thioredoxin (FTR)complexes. Can assemble a 4Fe-4S cluster and transfer it toapoproteins in yeast cells. Probably not required for assembly orstability of plastidic 2Fe-2S clusters	Expressed in aerial tissues exposed to light.Very low expression in roots. {ECO:0000269|PubMed:14645254,ECO:0000269|PubMed:14690502}.	Plastid, chloroplast stroma{ECO:0000269|PubMed:14645254, ECO:0000269|PubMed:14690502}.	1.23683	-0.0443755	0.0554321	1.0876	1.67318	-0.968985	-0.441093	-0.628825	-0.901493	-1.06827
AT5G26570	Q6ZY51;B3H4K8	Phosphoglucan, water dikinase, chloroplastic	GWD3;ATGWD3	B3H4K8_ARATH;PWD_ARATH	GWD3;PWD	protein autophosphorylation;starch catabolic process;starch metabolic process	6-phosphoglucan, water dikinase activity;ATP binding;carbohydrate kinase activity;kinase activity;metal ion binding;phosphoglucan, water dikinase activity;phosphogluco-amylopectin water dikinase activity;starch binding	chloroplast;chloroplast stroma;plastid	49	49	49	53.5	53.5	53.5	131.32	323.31	6373000000	559	4.66805	0	-0.576206	-8.82096	Mediates the incorporation of phosphate into starch-likephospho-alpha-glucan, mostly at the C-3 position of glucose units.Required for starch degradation, suggesting that the phosphatecontent of starch regulates its degradability	In all starch containing tissues (e.g. roots,leaves, stems, inflorescence and siliques).{ECO:0000269|PubMed:15686522}.	Plastid, chloroplast{ECO:0000269|PubMed:15618411, ECO:0000269|PubMed:15686522}.Note=Starch granules during starch mobilization in darkness.	-0.961953	-0.817381	-0.667816	-0.837368	-1.23238	0.462197	0.520395	1.04927	1.42626	1.05877
AT1G17050	Q76FS5	Solanesyl diphosphate synthase 2, chloroplastic	SPS2	SPS2_ARATH	SPS2	isoprenoid biosynthetic process;photosynthesis;plastoquinone biosynthetic process	all-trans-nonaprenyl-diphosphate synthase (geranylgeranyl-diphosphate specific) activity;metal ion binding;trans-octaprenyltranstransferase activity	chloroplast;chloroplast stroma;plastid	6	6	6	25.4	25.4	25.4	46.044	92.424	329470000	100	1.86205	0.0373333	0.653013	3.1432	Involved in providing solanesyl diphosphate forplastoquinone-9 formation. Prefers geranylgeranyl diphosphate tofarnesyl diphosphate as substrate. No activity with geranyldiphosphate or dimethylallyl diphosphate as substrate	Higher expression in leaves than in roots.{ECO:0000269|PubMed:15784989}.	Plastid, chloroplast{ECO:0000269|PubMed:15653808, ECO:0000269|PubMed:15784989}.	0.274211	0.674019	-0.52718	2.03844	1.06652	-0.841453	-0.327249	-0.648423	-1.17395	-0.534933
AT2G37690	Q84TI2		At2g37690	Q84TI2_ARATH		'de novo' IMP biosynthetic process;pollen development	ATP binding;metal ion binding;phosphoribosylaminoimidazole carboxylase activity	chloroplast;chloroplast stroma	6	6	5	15.3	15.3	12	69.751	47.75	213920000	36	1.9402	0.0338149	0.45239	3.26296				0.323046	1.63073	0.704577	0.813606	0.112309	-1.61666	0.231668	-1.39776	-0.64891	-0.152595
AT4G26500	Q84W65	SufE-like protein 1, chloroplastic/mitochondrial	SUFE1	SUFE1_ARATH	SUFE1		enzyme activator activity	chloroplast;chloroplast stroma;mitochondrion	14	14	14	45	45	45	40.833	37.21	668780000	100	1.83689	0.0386129	0.385275	3.10486	Participates in cysteine desulfurization mediated byNFS2 in chloroplast and NIFS1 in mitochondrion (PubMed:16437155).Activates the cysteine desulfurase activity of NFS2(PubMed:16455656). Cysteine desulfurization mobilizes sulfur fromL-cysteine to yield L-alanine and supplies the inorganic sulfurfor iron-sulfur (Fe-S) cluster formation. Glutaredoxins regulateSUFE1 activity by inducing its reductio…	Expressed in roots, leaves, stems and flowers.{ECO:0000269|PubMed:16455656}.	Plastid, chloroplast stroma{ECO:0000269|PubMed:16437155, ECO:0000269|PubMed:16455656}.Mitochondrion {ECO:0000269|PubMed:16437155}.	-0.473181	0.605654	0.646067	1.94885	0.779181	0.00995265	-0.81291	-0.667012	-0.567159	-1.46944
AT3G15690	Q8GRT9;F4J017;A0A1I9LMU4		At3g15690	F4J017_ARATH;Q8GRT9_ARATH		fatty acid biosynthetic process		chloroplast	6	6	6	36.1	36.1	36.1	28.169	54.959	619330000	77	2.36376	0.0180828	0.684989	3.93478				0.613067	0.824765	-0.148942	1.27482	1.28788	-1.82633	-0.629247	-0.13092	-0.421432	-0.84366
AT1G09795	Q8GSJ1	ATP phosphoribosyltransferase 2, chloroplastic	HISN1B	HIS1B_ARATH	HISN1B	histidine biosynthetic process	ATP phosphoribosyltransferase activity;magnesium ion binding	chloroplast;chloroplast stroma	9	9	8	30	30	25.2	44.756	40.09	1428200000	151	2.24355	0.0211793	0.591853	3.73973	Catalyzes the condensation of ATP and 5-phosphoribose 1-diphosphate to form N'-(5'-phosphoribosyl)-ATP (PR-ATP).		Plastid, chloroplast {ECO:0000305}.	1.12488	0.127846	-0.0723382	1.45423	1.1486	-0.994358	-0.459072	-0.245495	-0.391361	-1.69294
AT4G37910	Q8GUM2	Heat shock 70 kDa protein 9, mitochondrial	HSP70-9	HSP7I_ARATH	HSP70-9	cellular response to heat;cellular response to unfolded protein;chaperone cofactor-dependent protein refolding;protein refolding;response to cadmium ion;response to cytokinin;response to salt stress;response to unfolded protein	ATP binding;ATPase activity;ATPase activity, coupled;heat shock protein binding;misfolded protein binding;protein binding involved in protein folding;unfolded protein binding;zinc ion binding	cell wall;cytoplasm;mitochondrion;vacuolar membrane	23	19	19	42.1	34.9	34.9	73.074	134.18	1562300000	183	3.68768	0.00247059	0.769272	6.41753	In cooperation with other chaperones, Hsp70s stabilizepreexistent proteins against aggregation and mediate the foldingof newly translated polypeptides in the cytosol as well as withinorganelles. These chaperones participate in all these processesthrough their ability to recognize nonnative conformations ofother proteins. They bind extended peptide segments with a nethydrophobic character exposed …		Mitochondrion {ECO:0000305|PubMed:25732537}.	0.981744	0.652447	0.339505	1.26235	1.1045	-1.11627	-0.351121	-0.382374	-1.06618	-1.4246
AT5G03900	Q8GW20-2;Q8GW20	Uncharacterized protein At5g03900, chloroplastic		Y5390_ARATH				chloroplast envelope;chloroplast membrane;integral component of membrane;plastid	6	6	6	18.2	18.2	18.2	48.173	26.139	183760000	45	2.37927	0.0176643	0.314421	3.96023			Multi-pass membrane protein {ECO:0000255}.;Plastid, chloroplast membrane {ECO:0000255}	0.424071	-0.515967	1.69694	1.09022	1.16476	-0.595478	-1.00699	-0.71663	-0.943238	-0.597688
AT4G16390	Q8GWE0	Pentatricopeptide repeat-containing protein At4g16390, chloroplastic	P67	PP314_ARATH	P67	chloroplast organization;chloroplast RNA processing;positive regulation of translation	mRNA binding;nucleotide binding	chloroplast;chloroplast stroma;mitochondrion	8	8	8	15.5	15.5	15.5	78.242	35.304	187880000	33	3.38407	0.00312381	1.37316	5.78324	Involved in chloroplast RNA processing. Can bind RNA(PubMed:11034340). Involved in chloroplast development(PubMed:21187014). Involved in chloroplast ribosomal RNA (rRNA)processing and/or translation. Required for FtsH-mediatedchloroplast biogenesis (PubMed:20935174). Involved in translationand accumulation of chloroplast ATP synthase subunits(PubMed:23076438).	Expressed in leaves and flowers and at lowerlevels in stems and flower buds. {ECO:0000269|PubMed:11034340}.	Plastid, chloroplast{ECO:0000269|PubMed:11034340, ECO:0000269|PubMed:18431481,ECO:0000269|PubMed:20935174}. Note=Accumulates in discrete fociwithin the chloroplast. {ECO:0000269|PubMed:20935174}.	0.978799	0.255834	0.645194	1.196	1.18528	-0.423288	-0.308187	-0.8371	-1.09607	-1.59646
AT2G17695	Q8GXB1;A0A2H1ZE19	UPF0548 protein At2g17695		A0A2H1ZE19_ARATH;U548_ARATH				chloroplast;chloroplast envelope	6	6	6	44.4	44.4	44.4	23.245	83.447	1004400000	67	1.93359	0.0339911	-0.44954	-3.2528				-0.775987	-1.48236	-1.07676	0.0280381	-0.27239	1.15815	0.576772	1.50803	0.861551	-0.525039
AT4G11960	Q8GYC7;F4JPU9	PGR5-like protein 1B, chloroplastic	PGRL1B	F4JPU9_ARATH;PGL1B_ARATH	PGRL1B	photosynthesis;photosynthetic electron transport in photosystem I	oxidoreductase activity, acting on iron-sulfur proteins as donors	chloroplast thylakoid membrane;integral component of membrane	7	6	6	37.4	27.5	27.5	34.909	323.31	432570000	67	2.1887	0.0230432	-0.727019	-3.65197	Ferredoxin-plastoquinone reductase involved in cyclicelectron flow (CEF) around photosystem I. The homodimer isprobably not involved in CEF.		Multi-pass membrane protein{ECO:0000269|PubMed:18243102}.;Plastid, chloroplast thylakoid membrane{ECO:0000269|PubMed:18243102}	-0.504938	-0.245893	-1.28753	-1.24908	-0.462741	0.911602	0.287144	0.184224	2.05057	0.316653
AT1G60550	Q8GYN9	1,4-dihydroxy-2-naphthoyl-CoA synthase, peroxisomal	MENB	MENB_ARATH	MENB	menaquinone biosynthetic process;phylloquinone biosynthetic process	1,4-dihydroxy-2-naphthoyl-CoA synthase activity;isomerase activity	cytosol;peroxisome	6	6	6	21.1	21.1	21.1	37.056	4.8124	149570000	27	2.68252	0.010914	1.62985	4.47219	Involved in the biosynthesis of phylloquinone (vitaminK1). Converts o-succinylbenzoyl-CoA (OSB-CoA) to 1,4-dihydroxy-2-naphthoyl-CoA (DHNA-CoA) (By similarity).		Peroxisome {ECO:0000269|PubMed:20150517,ECO:0000305|PubMed:17951448}.	1.27551	0.815336	0.214172	1.02013	0.683785	-1.52497	-0.162499	-1.19817	0.0448835	-1.16817
AT5G13370	Q8GZ29;Q9LYU1;F4K2J6			Q8GZ29_ARATH		auxin conjugate metabolic process	glutamine binding	cytosol	12	12	9	28.2	28.2	21	66.978	48.28	291330000	81	4.40457	0.00215385	1.81203	8.11514				0.822614	0.677322	1.09582	0.966236	0.917162	-1.53605	-0.600797	-1.11953	-0.900857	-0.321921
AT3G03710	Q8GZQ3	Polyribonucleotide nucleotidyltransferase 1, chloroplastic	PNP1	PNP1_ARATH	PNP1	carotene biosynthetic process;cellular response to phosphate starvation;chlorophyll biosynthetic process;chloroplast RNA processing;mitochondrial mRNA catabolic process;mitochondrial RNA 3'-end processing;mitochondrial RNA catabolic process;mitochondrial RNA processing;mRNA processing;negative regulation of isopentenyl diphosphate biosynthetic process, methylerythritol 4-phosphate pathway;RNA cat…	3'-5'-exoribonuclease activity;polyribonucleotide nucleotidyltransferase activity;RNA binding	chloroplast;chloroplast stroma;cytosol;mitochondrion	27	27	27	34.3	34.3	34.3	99.565	56.504	2425700000	302	2.78163	0.00911765	0.363229	4.64594	Involved in the metabolism of all major classes ofplastid RNAs. Required for efficient 3'-end processing of mRNAsand 3'-end maturation of rRNA transcripts, but is not sufficientto mediate their degradation. Mediates tRNA degradation. Mayfunction as a poly(A) mRNA 3'-5' degrading phosphorylase. May berequired for plastid ribosome assembly and non-coding RNAbiogenesis and accumulation. Seems not re…		Plastid, chloroplast{ECO:0000269|PubMed:12486011, ECO:0000269|PubMed:18469163}.	1.5042	0.832281	0.470316	1.32736	-0.0825168	-0.812345	-1.0972	-0.327126	-0.440057	-1.37491
AT5G13030	Q8H126		At5g13030	Q8H126_ARATH		response to water deprivation		chloroplast;chloroplast stroma;chloroplast thylakoid	21	21	21	38.7	38.7	38.7	71.097	235.45	1840800000	187	3.54874	0.00296629	0.24666	6.12165				1.12921	0.670594	1.38827	1.11945	-0.00151435	-0.885339	-1.17109	-1.10486	-0.750579	-0.39414
AT1G24180	Q8H1Y0	Pyruvate dehydrogenase E1 component subunit alpha-2, mitochondrial	IAR4	ODPA2_ARATH	IAR4	acetyl-CoA biosynthetic process from pyruvate;glycolytic process;response to salt stress	cobalt ion binding;pyruvate dehydrogenase (acetyl-transferring) activity;zinc ion binding	cytosol;mitochondrial matrix;mitochondrion;nucleus	12	9	9	32.1	25.7	25.7	43.358	22.096	587650000	110	1.84199	0.0384828	-0.415603	-3.11263	The pyruvate dehydrogenase complex catalyzes the overallconversion of pyruvate to acetyl-CoA and CO(2). It containsmultiple copies of three enzymatic components: pyruvatedehydrogenase (E1), dihydrolipoamide acetyltransferase (E2) andlipoamide dehydrogenase (E3).		Mitochondrion matrix{ECO:0000269|PubMed:14671022}.	-0.536465	-0.853138	-0.131941	-0.639357	-1.34964	1.08654	0.0358272	-0.139964	2.08245	0.445694
AT3G48110	Q8L785-2;Q8L785	Glycine--tRNA ligase 2, chloroplastic/mitochondrial	GLYRS-2	SYGM2_ARATH	EDD1	embryo development ending in seed dormancy;glycyl-tRNA aminoacylation;regulation of embryonic development	ATP binding;glycine-tRNA ligase activity;protein dimerization activity	chloroplast;chloroplast stroma;mitochondrion	23	23	23	33.4	33.4	33.4	119.67	181.5	2252700000	297	3.0258	0.00521519	0.44138	5.08921	Catalyzes the attachment of glycine to tRNA(Gly). Isalso able produce diadenosine tetraphosphate (Ap4A), a universalpleiotropic signaling molecule needed for cell regulationpathways, by direct condensation of 2 ATPs		Plastid, chloroplast{ECO:0000269|PubMed:11278923}. Mitochondrion{ECO:0000269|PubMed:11278923, ECO:0000305|PubMed:25732537}.	0.9256	1.2074	-0.214385	1.08363	1.14388	-0.836677	-0.211734	-0.847455	-1.40968	-0.840575
AT1G78370	Q8L7C9;Q8GYM1	Glutathione S-transferase U20	GSTU20	GSTUK_ARATH	GSTU20	glutathione metabolic process;regulation of growth;regulation of response to red or far red light;response to cytokinin;response to gravity;toxin catabolic process	enzyme binding;glutathione binding;glutathione transferase activity	apoplast;chloroplast;cytoplasm;cytosol;nucleus	19	18	18	60.8	60.8	60.8	25.006	44.235	4645400000	250	1.81233	0.0401333	-0.34738	-3.06755	Exhibits glutathione-dependent thiol transferaseactivities. Can use glutathione (GSH) and 1-chloro-2,4-dinitrobenzene (CDNB) as substrates. Involved in the regulation offar-red light influence on development (PubMed:17220357).Regulator of the interplay between light and JA signaling byincreasing JAR1/FIN219 efficiency (PubMed:28223489). Maybeinvolved in gravitropic signal transduction (Probable)	Mostly associated with vascular tissues,especially near hydathodes. {ECO:0000269|PubMed:17220357}.	Nucleus {ECO:0000269|PubMed:17220357}.Cytoplasm, cytosol {ECO:0000269|PubMed:17220357}.	-1.19852	-1.13794	-0.411252	-0.695768	-0.0437825	1.68192	1.29428	0.90786	0.122961	-0.519757
AT5G26742	Q8L7S8;F4K180;Q8L7S8-2	DEAD-box ATP-dependent RNA helicase 3, chloroplastic	RH3;emb1138	F4K180_ARATH;RH3_ARATH	emb1138;RH3	chloroplast organization;Group II intron splicing;response to salt stress;ribosome biogenesis	ATP binding;helicase activity;mRNA binding;RNA binding;zinc ion binding	chloroplast;chloroplast envelope;chloroplast stroma;membrane;nucleus	28	28	28	44.9	44.9	44.9	81.155	92.06	1823000000	257	4.05591	0.00195349	1.12704	7.25155	Nuclear genome-encoded factor involved in ribosomebiogenesis in chloroplasts (PubMed:22576849, PubMed:23227895,PubMed:25043599). Binds specific group II introns in chloroplastsand facilitates their splicing. Is required for rRNA maturation inplastids and may contribute to the assembly of the large (50S)ribosomal subunit (PubMed:22576849). Required for normaldevelopment of chloroplasts (PubMed:225…	Highly expressed in young seedlings.{ECO:0000269|PubMed:23227895}.	Plastid, chloroplast{ECO:0000269|PubMed:18431481}. Plastid, chloroplast stroma{ECO:0000269|PubMed:23227895}.	1.29702	0.263358	0.365111	1.30476	1.1889	-0.69235	-0.879858	-0.778506	-1.04773	-1.02071
AT5G01410	Q8L940	Pyridoxal 5-phosphate synthase subunit PDX1.3	PDX13	PDX13_ARATH	PDX13	cellular amino acid metabolic process;chlorophyll metabolic process;hyperosmotic salinity response;pyridoxal phosphate biosynthetic process;pyridoxine biosynthetic process;response to lipid hydroperoxide;response to non-ionic osmotic stress;response to oxidative stress;response to salt stress;response to UV-B	amine-lyase activity;protein heterodimerization activity;protein homodimerization activity;pyridoxal 5'-phosphate synthase (glutamine hydrolysing) activity	cytosol;endomembrane system;plasma membrane	12	8	8	43	28.2	28.2	33.216	23.29	1723200000	105	1.73189	0.0461146	0.365718	2.94596	Catalyzes the formation of pyridoxal 5'-phosphate fromribose 5-phosphate (RBP), glyceraldehyde 3-phosphate (G3P) andammonia. The ammonia is provided by PDX2. Can also use ribulose 5-phosphate and dihydroxyacetone phosphate as substrates, resultingfrom enzyme-catalyzed isomerization of RBP and G3P, respectively.Also plays an indirect role in resistance to singlet oxygen-generating photosensitizers.	Expressed in cotyledons, rapidly dividing rootstele tissues, stems, leaves, flowers, mature pollen, andsiliques. {ECO:0000269|PubMed:16236150,ECO:0000269|PubMed:16766694}.	Cytoplasm. Cell membrane. Membrane.	1.92522	0.204456	0.198353	0.645682	0.44795	0.00882266	-1.35285	-0.546641	0.0387812	-1.56978
AT5G16130	Q8LD03	40S ribosomal protein S7-3	RPS7C	RS73_ARATH	RPS7C	ribosomal small subunit biogenesis;rRNA processing;translation	mRNA binding;structural constituent of ribosome	cytosol;cytosolic ribosome;cytosolic small ribosomal subunit;membrane;nucleolus;plasma membrane;plasmodesma;polysomal ribosome;small-subunit processome	11	11	9	58.9	58.9	53.7	22.06	99.899	1703600000	173	2.07737	0.0270231	-0.222448	-3.47604				-0.741621	-1.33451	-0.435119	-0.0690296	-1.099	1.62829	1.30009	0.829252	-0.381879	0.303533
AT1G67700	Q8LDL0-3;Q8LDL0-2;Q8LDL0	Protein HHL1, chloroplastic	HHL1	HHL1_ARATH	HHL1			chloroplast;chloroplast envelope;chloroplast thylakoid;chloroplast thylakoid membrane;integral component of membrane	9	9	9	42.4	42.4	42.4	25.911	193.13	2050600000	102	1.90373	0.0354741	0.341388	3.20694	Involved in photoprotection. Forms a complex with LQY1that is involved in the repair and reassembly cycle of the PSII-LHCII supercomplex under high-light conditions. May function inguiding the release of psbC from PSII core monomers		Single-pass membrane protein{ECO:0000305}. Note=Found in the stroma lamellae > grana margin >grana core. {ECO:0000269|PubMed:24632535}.;Plastid, chloroplast thylakoid membrane{ECO:0000269|PubMed:24632535}	0.645201	-0.195199	-0.0216128	1.09261	2.03647	-0.232756	-1.08383	-0.298847	-0.960159	-0.981879
AT4G35260	Q8LFC0;O81796;Q9LQK9-2;Q9LQK9	Isocitrate dehydrogenase [NAD] regulatory subunit 1, mitochondrial	IDH1	IDH1_ARATH	IDH1	isocitrate metabolic process;tricarboxylic acid cycle	isocitrate dehydrogenase (NAD+) activity;zinc ion binding	mitochondrion	19	19	13	55.3	55.3	43.1	39.626	228.46	2672200000	280	2.90282	0.00734831	-0.268667	-4.86316	Performs an essential role in the oxidative function ofthe citric acid cycle.	Ubiquitous. Predominantly expressed in roots,stems and leaves. {ECO:0000269|PubMed:16527867}.	Mitochondrion {ECO:0000269|PubMed:14671022}.	-1.59803	-0.104594	-0.454667	-1.42977	-0.513282	0.480463	0.878158	0.398175	1.08734	1.25621
AT5G13980	Q8LPJ3;F4K5E7	Alpha-mannosidase	At5g13980	F4K5E7_ARATH;MANA2_ARATH	MAC12.38	mannose metabolic process;protein deglycosylation	alpha-mannosidase activity;carbohydrate binding;metal ion binding	apoplast;cell wall;plant-type cell wall;vacuolar membrane;vacuole	17	17	17	24.8	24.8	24.8	115.9	89.901	1870500000	195	1.85171	0.0377832	-0.393912	-3.12743	Liberates mannose from p-nitrophenyl-alpha-D-mannosidein vitro.			-0.033157	-0.664585	-0.358329	-2.14702	-0.314972	1.26378	0.928348	-0.116048	1.04336	0.398618
AT1G06950	Q8LPR9	Protein TIC110, chloroplastic	TIC110	TI110_ARATH	TIC110	chloroplast organization;protein import into chloroplast stroma		chloroplast;chloroplast envelope;integral component of membrane;membrane;plastid;Tic complex;TOC-TIC supercomplex I	49	49	49	51.5	51.5	51.5	112.12	323.31	8490700000	631	2.84913	0.00779058	0.330233	4.76626	Involved in protein precursor import into chloroplasts.Forms a voltage-dependent cation-selective channel at the innerenvelope of chloroplasts, which specifically responds to a transitpeptide. Associates with both the precursor and mature forms ofthe preprotein.	Expressed in seedlings, flowers, leaves, stemsand roots. {ECO:0000269|PubMed:15033972,ECO:0000269|PubMed:15659100, ECO:0000269|PubMed:15829604}.	Multi-pass membrane protein {ECO:0000305}.;Plastid, chloroplast inner membrane{ECO:0000305}	1.51048	0.239951	0.742453	0.396017	1.19032	-0.580978	-1.14037	-0.325853	-0.413018	-1.619
AT1G02150	Q8LPS6	Pentatricopeptide repeat-containing protein At1g02150		PPR3_ARATH			mRNA binding	chloroplast;mitochondrion	12	12	12	28.2	28.2	28.2	59.882	25.009	313520000	52	2.85771	0.00778836	1.18609	4.78168				0.901546	0.0964614	0.585378	1.11997	1.3793	-1.29127	-0.818256	-0.270682	-0.211263	-1.49118
AT2G30200	Q8RU07;F4IMR0		At2g30200	F4IMR0_ARATH;Q8RU07_ARATH	EMB3147		[acyl-carrier-protein] S-malonyltransferase activity;transferase activity	chloroplast;chloroplast stroma	15	15	15	43.5	43.5	43.5	41.522	89.893	2702200000	207	2.60401	0.0122542	0.336738	4.33689				1.30646	1.0886	-0.273803	0.761236	1.09064	-0.349211	-0.422207	-0.81664	-0.71672	-1.66835
AT3G19340	Q8RWC3		At3g19340	Q8RWC3_ARATH			aminopeptidase activity	endoplasmic reticulum;plasma membrane	6	6	6	19.5	19.5	19.5	56.787	32.159	285750000	50	2.25794	0.0208075	-0.604691	-3.76288				-1.64581	0.25566	-0.87673	-0.825737	-0.699086	1.18931	0.682249	0.426334	1.49166	0.00214227
AT4G31390	Q8RWG1;A0A1P8B7P6;Q8RWG1-2	Uncharacterized aarF domain-containing protein kinase At4g31390, chloroplastic		A0A1P8B7P6_ARATH;AB1K1_ARATH	ABC1K1;ACDO1	cellular response to nitrogen starvation;chlorophyll catabolic process;photosynthetic electron transport chain;plastoglobule organization;positive regulation of carotenoid biosynthetic process;positive regulation of chlorophyll biosynthetic process;regulation of anthocyanin biosynthetic process;regulation of photosynthesis;regulation of tocopherol cyclase activity;response to blue light;response …	ATP binding;protein kinase activity	chloroplast;plastoglobule	16	16	16	29.3	29.3	29.3	76.756	38.474	507690000	93	1.85192	0.0378361	-0.279325	-3.12775	Kinase that can phosphorylates the tocopherol cyclaseVTE1, a key enzyme of tocopherol (vitamin E) metabolism andinvolved in the recycling of oxidated alpha-tocopherol quinone,possibly stabilizing it at plastoglobules. Regulates alsoplastoglobule protein composition (PubMed:24267661). Preventsphotodamage of chloroplasts under continuous red light, thusworking in opposition to ABC1K3 (PubMed:258823…	Expressed in all tissues (e.g. especially inleaves) at all developmental stages from seed germination toflowering, except in the root tips. {ECO:0000269|PubMed:22447966}.	Plastid, chloroplast, plastoglobule{ECO:0000269|PubMed:16461379, ECO:0000269|PubMed:22274653}.Plastid, chloroplast {ECO:0000269|PubMed:22447966}.	-1.87353	-0.439844	0.492637	-1.06496	-0.632516	0.907452	-0.0993781	0.767307	0.647312	1.29552
AT5G04280	Q8RWN5;C0Z388	Glycine-rich RNA-binding protein RZ1C	RZ1C;At5g04280	C0Z388_ARATH;RZ1C_ARATH	AtRZ-1c;RZ1C	negative regulation of transcription, DNA-templated;positive regulation of mRNA splicing, via spliceosome;response to cold;response to water deprivation	chromatin binding;chromatin DNA binding;mRNA binding;nucleic acid binding;RNA binding;zinc ion binding	nucleolus;nucleus;ribonucleoprotein complex	7	7	7	27.1	27.1	27.1	33.486	7.174	351950000	41	2.37376	0.0178258	-0.437946	-3.95119	Binds RNA and DNA sequences non-specifically. May beinvolved in tolerance to cold stress	Expressed in roots, rosette and caulineleaves, stems, floral buds and flowers.{ECO:0000269|PubMed:20850334}.	Nucleus {ECO:0000269|PubMed:20850334}.	-0.279104	-0.649753	-0.710777	-0.0495466	-2.16785	0.759367	0.990571	0.291672	0.877297	0.938127
AT3G13930	Q8RWN9	Dihydrolipoyllysine-residue acetyltransferase component 2 of pyruvate dehydrogenase complex, mitochondrial		ODP22_ARATH		glycolytic process	acetyltransferase activity;copper ion binding;dihydrolipoyllysine-residue acetyltransferase activity;lipoic acid binding	chloroplast;chloroplast envelope;cytoplasm;mitochondrial matrix;mitochondrion;pyruvate dehydrogenase complex	24	24	20	41.2	41.2	32.8	58.467	176.88	5653100000	340	2.53605	0.0134219	-0.234375	-4.22137	The pyruvate dehydrogenase complex catalyzes the overallconversion of pyruvate to acetyl-CoA and CO(2). It containsmultiple copies of three enzymatic components: pyruvatedehydrogenase (E1), dihydrolipoamide acetyltransferase (E2) andlipoamide dehydrogenase (E3).		Mitochondrion matrix{ECO:0000269|PubMed:14671022, ECO:0000305|PubMed:25732537}.	-1.40857	-0.554889	-0.949325	-0.487788	-0.540073	0.390121	-0.287677	1.27174	1.02673	1.53973
AT3G62910	Q8RX79	Peptide chain release factor APG3, chloroplastic	APG3	APG3_ARATH	APG3	chloroplast organization;plastid translation;regulation of growth;thylakoid membrane organization;translational termination	ribosome binding;translation release factor activity;translation release factor activity, codon specific	chloroplast	6	6	6	19.4	19.4	19.4	47.529	115.11	304390000	48	1.93007	0.0343681	1.35225	3.24738	May direct the termination of translation in response tothe peptide chain termination codon UAG. Required for normalchloroplast development and plays essential roles in thetermination of translation in plastids	Expressed in roots, leaves and stems.{ECO:0000269|PubMed:17450416}.	Plastid, chloroplast{ECO:0000269|PubMed:17450416}.	1.03138	0.168947	0.457457	1.1045	0.814609	0.417705	-0.72659	-1.61646	-1.57936	-0.0721837
AT2G40840	Q8RXD9	4-alpha-glucanotransferase DPE2	DPE2	DPE2_ARATH	DPE2	maltose catabolic process;maltose metabolic process;polysaccharide metabolic process;starch catabolic process	4-alpha-glucanotransferase activity;beta-maltose 4-alpha-glucanotransferase activity;heteropolysaccharide binding;starch binding	cytosol	44	44	44	57	57	57	109.78	305.3	4922600000	485	3.8849	0.0017931	-0.364404	-6.85485	Cytosolic alpha-glucanotransferase essential for thecytosolic metabolism of maltose, an intermediate on the pathway bywhich starch is converted to sucrose in leaves at night.Metabolizes maltose exported from the chloroplast and is specificfor beta-maltose. May play a role in freezing tolerance.Temperature drop induces inactivation of DPE2 that leads to rapidaccumulation of maltose, a solute that …		Cytoplasm, cytosol{ECO:0000269|PubMed:14996213, ECO:0000269|PubMed:16596410,ECO:0000269|PubMed:20700743}.	-0.625255	-0.67516	-0.90946	-0.560451	-1.61449	0.657539	0.541821	1.49677	0.762681	0.926008
AT5G49030	Q8RXK8;F4K4Q2;Q8RXK8-2		OVA2	F4K4Q2_ARATH;SYIM_ARATH	OVA2	isoleucyl-tRNA aminoacylation;mitochondrial translation;plant ovule development	aminoacyl-tRNA editing activity;ATP binding;isoleucine-tRNA ligase activity;metal ion binding;tRNA binding	chloroplast;chloroplast stroma;cytoplasm;mitochondrion	25	25	25	34.8	34.8	34.8	123.01	71.889	1333500000	266	2.49533	0.0144755	0.245384	4.15285			Plastid, chloroplast{ECO:0000269|PubMed:16251277}. Mitochondrion{ECO:0000269|PubMed:16251277}.	1.2029	0.476046	0.936501	0.884611	0.420425	-0.948289	-0.279735	-0.166361	-2.06751	-0.458591
AT5G01220	Q8S4F6;A0A1P8BCW3	Sulfoquinovosyl transferase SQD2	SQD2	A0A1P8BCW3_ARATH;SQD2_ARATH	SQD2	cellular response to phosphate starvation;glycolipid biosynthetic process;sulfolipid biosynthetic process	UDP-glycosyltransferase activity;UDP-sulfoquinovose:DAG sulfoquinovosyltransferase activity	chloroplast;chloroplast envelope;chloroplast membrane;integral component of membrane;plastid	5	5	5	16.5	16.5	16.5	56.63	15.305	184220000	27	2.82422	0.0083299	0.888811	4.72168	Catalyzes the transfer of the sulfoquinovose moiety fromUDP-sulfoquinovose to diacylglycerol during sulfolipidbiosynthesis. Sulfolipid contributes to maintaining a negativelycharged lipid-water interface, a requirement for proper functionof photosynthetic membranes. Sulfolipid may also function as asubstitute of anionic phospholipids under phosphate-limited growthconditions.		Single-pass membrane protein{ECO:0000255}.;Plastid, chloroplast membrane {ECO:0000255,ECO:0000269|PubMed:21506606}	1.34026	0.921445	0.256722	0.300192	1.25057	-0.0244923	-0.915095	-1.03895	-0.529634	-1.56102
AT5G48230	Q8S4Y1;Q8S4Y1-2	Acetyl-CoA acetyltransferase, cytosolic 1	AAT1	THIC1_ARATH	AAT1	fatty acid beta-oxidation;isoprenoid biosynthetic process;pollen germination;pollen tube growth;sterol metabolic process	acetyl-CoA C-acetyltransferase activity;acetyl-CoA C-acyltransferase activity;metal ion binding	cytosol;peroxisome;plasma membrane	10	10	10	35.5	35.5	35.5	41.411	112.06	1364100000	173	3.28995	0.00344348	0.388005	5.59552			Cytoplasm {ECO:0000305}.	0.867081	0.417667	1.09233	0.90051	0.955732	-0.317994	-0.291215	-0.579743	-1.51588	-1.52849
AT4G32285	Q8S9J8	Probable clathrin assembly protein At4g32285		CAP1_ARATH		clathrin coat assembly;clathrin-dependent endocytosis	1-phosphatidylinositol binding;clathrin binding	cell plate;clathrin-coated pit;clathrin-coated vesicle;cytosol;Golgi apparatus;nucleus;plasma membrane	7	7	4	17	17	11.5	70.554	19.183	235860000	49	3.42353	0.00328	-0.518608	-5.86317			Membrane, clathrin-coated pit {ECO:0000250}.Golgi apparatus {ECO:0000250}. Cytoplasmic vesicle, clathrin-coated vesicle {ECO:0000250}. Note=Colocalized with clathrin inthe Golgi area. {ECO:0000250}.	0.00305958	-1.26893	-0.864445	-0.573835	-1.56813	1.03767	0.592744	0.874467	0.660573	1.10683
AT5G55220	Q8S9L5	Trigger factor-like protein TIG, Chloroplastic	TIG	TIG_ARATH	TIG	chaperone-mediated protein folding;'de novo' cotranslational protein folding;protein transport;protein unfolding	peptidyl-prolyl cis-trans isomerase activity;protein binding involved in protein folding;ribosome binding	chloroplast;chloroplast envelope;chloroplast stroma	34	34	34	54.5	54.5	54.5	61.733	279.36	5594200000	445	2.26076	0.0207875	0.447026	3.76743	Involved in protein export. Acts as a chaperone bymaintaining the newly synthesized protein in an open conformation.Functions as a peptidyl-prolyl cis-trans isomerase (Bysimilarity).		Plastid, chloroplast {ECO:0000305}.	0.836134	0.050689	0.226124	1.27405	1.40635	-0.438747	-0.0864714	-0.517518	-0.930676	-1.81994
AT3G54960	Q8VX13;Q8VX13-2	Protein disulfide isomerase-like 1-3	PDIL1-3	PDI13_ARATH	PDIL1-3	cell redox homeostasis;protein folding;response to endoplasmic reticulum stress	protein disulfide isomerase activity	chloroplast;endoplasmic reticulum;endoplasmic reticulum lumen;vacuolar membrane	10	10	10	25.6	25.6	25.6	64.211	71.028	248550000	46	1.71326	0.0470072	-1.21734	-2.91792	Acts as a protein-folding catalyst that interacts withnascent polypeptides to catalyze the formation, isomerization, andreduction or oxidation of disulfide bonds.	Widely expressed.{ECO:0000269|PubMed:18574595}.	Endoplasmic reticulum lumen {ECO:0000305}.	-0.0533354	-0.152558	-0.0891368	-2.16062	-0.950279	0.710561	1.39732	0.633062	-0.0646018	0.729591
AT5G43600	Q8VXY9	Ureidoglycolate hydrolase	UAH	UAH_ARATH	UAH	allantoin catabolic process;purine nucleobase catabolic process;ureide catabolic process	manganese ion binding;ureidoglycolate hydrolase activity	endoplasmic reticulum	8	8	8	16.4	16.4	16.4	51.486	27.121	367350000	73	1.82671	0.0393373	-0.471373	-3.08938	Involved in the catabolism of purine nucleotides. Canuse (S)-ureidoglycolate as substrate, but not (R)-ureidoglycolateor allantoate. The sequential activity of AAH, UGLYAH and UAHallows a complete purine breakdown without the intermediategeneration of urea.		Endoplasmic reticulum{ECO:0000305|PubMed:23940254}.	-0.761156	-0.472656	-0.56866	-0.955833	-0.740301	-0.059344	0.263739	0.835503	2.37356	0.0851442
AT1G62780	Q8VY70		At1g62780	Q8VY70_ARATH			transferase activity	chloroplast;chloroplast stroma	9	9	9	53.6	53.6	53.6	27.219	90.355	557030000	100	4.12585	0.00227027	1.05544	7.41874				0.64131	0.483133	0.785373	1.61771	0.904693	-0.805917	-1.0093	-0.621308	-0.63908	-1.35662
AT3G52150	Q8VYM4		At3g52150	PSRP2_ARATH	PSRP2	chloroplast rRNA processing;negative regulation of response to salt stress;negative regulation of response to water deprivation;regulation of seed germination;regulation of seedling development;response to cold;response to salt stress;response to water deprivation	RNA binding;rRNA binding;single-stranded DNA binding	chloroplast;chloroplast envelope;chloroplast stroma;chloroplast thylakoid membrane;ribonucleoprotein complex;ribosome;thylakoid	13	13	13	47.4	47.4	47.4	27.748	122.82	7187000000	246	3.34651	0.00317857	0.527387	5.70785	Component of the chloroplast ribosome (chloro-ribosome),a dedicated translation machinery responsible for the synthesis ofchloroplast genome-encoded proteins, including proteins of thetranscription and translation machinery and components of thephotosynthetic apparatus. May have a role in the recruitment ofstored chloroplast mRNAs for active protein synthesis (Bysimilarity). Bind single strand DN…	Expressed constitutively in roots, stems,flower buds, flowers and leaves. {ECO:0000269|PubMed:24220572}.	Plastid, chloroplast{ECO:0000269|PubMed:21923745, ECO:0000269|PubMed:24220572}.	0.357118	0.413764	0.53489	1.19139	1.75305	-0.817601	-0.582955	-0.789816	-1.32061	-0.739232
AT1G64710	Q8VZ49;A8MR36;A0A1P8AX34	Alcohol dehydrogenase-like 4	At1g64710	A0A1P8AX34_ARATH;A8MR36_ARATH;ADHL4_ARATH		formaldehyde catabolic process;oxidation-reduction process	alcohol dehydrogenase activity, zinc-dependent;oxidoreductase activity;S-(hydroxymethyl)glutathione dehydrogenase activity;zinc ion binding	cytosol	6	6	6	33.4	33.4	33.4	41.315	14.112	927500000	69	1.81841	0.0397559	-0.475636	-3.07677			Cytoplasm {ECO:0000250|UniProtKB:P06525}.	-1.52471	0.492483	-1.25265	-0.28406	-0.923138	-0.184225	0.460656	0.837178	1.46778	0.910686
AT5G14260	Q8VZB5;A0A1P8BDE0		F18O22_50	A0A1P8BDE0_ARATH;Q8VZB5_ARATH		peptidyl-lysine monomethylation	methyltransferase activity;protein-lysine N-methyltransferase activity	chloroplast;chloroplast stroma	18	18	18	43.6	43.6	43.6	57.585	150.74	2637200000	372	2.48733	0.0147368	0.41084	4.13944				1.00227	0.584769	0.61093	0.947261	0.771233	-0.86959	0.380472	-0.517804	-1.01522	-1.89431
AT5G62530	Q8VZC3	Delta-1-pyrroline-5-carboxylate dehydrogenase 12A1, mitochondrial	ALDH12A1	AL121_ARATH	ALDH12A1	proline catabolic process to glutamate;proline metabolic process;reactive oxygen species metabolic process;response to salt stress	1-pyrroline-5-carboxylate dehydrogenase activity;cobalt ion binding;oxidoreductase activity, acting on the aldehyde or oxo group of donors, NAD or NADP as acceptor;zinc ion binding	chloroplast;mitochondrial matrix;mitochondrion	27	27	27	57.7	57.7	57.7	61.772	228.72	3906000000	316	2.17201	0.0229609	-0.228743	-3.62542	Plays a role in the inhibition of programmed cell deathby converting the toxic proline catabolism intermediate (s)-1-pyrroline-5-carboxylate (P5C) to glutamate	Highly expressed in flowers. Constitutivelyexpressed at low levels in the other tissues.{ECO:0000269|PubMed:11532180}.	Mitochondrion matrix{ECO:0000305|PubMed:11532180}.	-0.731937	-0.734432	-0.0114698	-2.05032	-0.211738	1.16672	-0.0563384	0.808552	0.908767	0.912198
AT4G34138	Q8VZE9	UDP-glycosyltransferase 73B1	UGT73B1	U73B1_ARATH	UGT73B1		quercetin 3-O-glucosyltransferase activity;quercetin 7-O-glucosyltransferase activity;UDP-glycosyltransferase activity	intracellular membrane-bounded organelle	6	6	6	18.9	18.9	18.9	54.836	7.404	158280000	34	4.74237	0	2.27408	9.029	Possesses low quercetin 3-O-glucosyltransferase and 7-O-glucosyltransferase activities in vitro			0.906367	0.790859	0.98616	0.887378	0.955751	-0.717592	-1.38429	-1.31228	-0.788226	-0.32413
AT1G55850	Q8VZK9	Cellulose synthase-like protein E1	CSLE1	CSLE1_ARATH	CSLE1	cell wall organization;cellulose biosynthetic process;plant-type primary cell wall biogenesis	cellulose synthase (UDP-forming) activity;cellulose synthase activity	endoplasmic reticulum;Golgi apparatus;Golgi membrane;integral component of membrane;plasma membrane;trans-Golgi network	4	4	4	8.1	8.1	8.1	82.346	11.39	180810000	47	2.05791	0.02744	0.529069	3.44558	Thought to be a Golgi-localized beta-glycan synthasethat polymerize the backbones of noncellulosic polysaccharides(hemicelluloses) of plant cell wall.		Golgi apparatus membrane {ECO:0000305};Multi-pass membrane protein {ECO:0000305}.	0.441959	2.00788	0.743419	0.536337	-0.0632575	-0.541341	-1.46152	-0.559935	-0.0145377	-1.08901
AT3G08740	Q8VZW6		At3g08740	Q8VZW6_ARATH			translation elongation factor activity	chloroplast;chloroplast stroma;cytoplasm	10	10	10	34.7	34.7	34.7	26.228	34.21	1897100000	137	3.01303	0.00521951	0.586071	5.06547				1.23886	0.105701	0.542925	1.03873	1.21531	-0.114381	-1.23379	-0.39545	-1.33436	-1.06354
AT1G67280	Q8W593;Q8W593-2	Probable lactoylglutathione lyase, chloroplast		LGUC_ARATH		methylglyoxal catabolic process to D-lactate via S-lactoyl-glutathione;response to cold	lactoylglutathione lyase activity;metal ion binding	chloroplast;chloroplast stroma;stromule;thylakoid;thylakoid lumen	17	15	15	44.9	42.9	42.9	39.167	323.31	4778700000	256	1.90561	0.0355748	0.127882	3.20982	Catalyzes the conversion of hemimercaptal, formed frommethylglyoxal and glutathione, to S-lactoylglutathione		Plastid, chloroplast stroma{ECO:0000269|PubMed:11719511}.	0.636203	-0.637766	1.35007	1.2955	0.914854	-0.387397	-1.30552	-0.874079	-1.10428	0.112407
AT4G33500	Q93V88	Probable protein phosphatase 2C 62		P2C62_ARATH			metal ion binding;phosphoprotein phosphatase activity	chloroplast	12	12	12	22.4	22.4	22.4	78.923	116.4	1143100000	141	2.76813	0.00931401	-0.379452	-4.62208				-0.396391	0.0627883	-1.29464	-0.85566	-1.56208	0.51075	0.934607	0.428432	0.690199	1.48199
AT5G30510	Q93VC7		RPS1	RPS1_ARATH	RPS1	response to cytokinin;translation	mRNA binding;structural constituent of ribosome	chloroplast;chloroplast stroma;membrane;ribosome;thylakoid	25	25	25	67.3	67.3	67.3	45.11	302.64	10726000000	518	2.31586	0.0194286	0.416447	3.8566	Required for optimal plastid performance in terms ofphotosynthesis and growth. Required for the translation of plastidmRNAs (PubMed:22900828). Involved in cellular heat stress responseand required for heat tolerance. Required for transcriptionalactivation of HSFA2 and its target genes in response to heatstress. Plays a critical role in biosynthesis of thylakoidmembrane proteins encoded by chlorop…		Plastid, chloroplast {ECO:0000255,ECO:0000269|PubMed:22570631}.	1.06823	0.176524	0.865877	1.0228	0.691573	0.162614	-0.888647	-0.0215984	-1.56965	-1.50771
AT1G31800	Q93VK5	Protein LUTEIN DEFICIENT 5, chloroplastic	CYP97A3	LUT5_ARATH	CYP97A3	carotenoid biosynthetic process;xanthophyll biosynthetic process	carotene beta-ring hydroxylase activity;heme binding;iron ion binding;oxidoreductase activity, acting on paired donors, with incorporation or reduction of molecular oxygen	chloroplast;chloroplast envelope	7	7	7	21.2	21.2	21.2	66.845	8.5564	174410000	40	1.76976	0.0432576	1.46712	3.00308	Heme-containing cytochrome P450 involved in thebiosynthesis of xanthophylls. Specific for beta-ring hydroxylationof alpha- and beta-carotene. Has also a low activity toward theepsilon-rings of alpha-carotene. The beta-ring of alpha-caroteneis the preferred substrate in planta		Plastid, chloroplast {ECO:0000255}.	0.800201	0.510159	0.645908	0.807698	0.689042	-0.308066	0.2963	-0.0380877	-2.24018	-1.16298
AT5G28840	Q93VR3	GDP-mannose 3,5-epimerase		GME_ARATH		L-ascorbic acid biosynthetic process	GDP-mannose 3,5-epimerase activity;NAD binding	cytosol	24	24	24	62.6	62.6	62.6	42.758	208.02	6076800000	324	2.05082	0.0278806	0.387952	3.43449	Catalyzes a reversible epimerization of GDP-D-mannosethat precedes the committed step in the biosynthesis of vitamin C(L-ascorbate), resulting in the hydrolysis of the highly energeticglycosyl-pyrophosphoryl linkage. Able to catalyze 2 distinctepimerization reactions and can release both GDP-L-galactose andGDP-L-gulose from GDP-mannose.			0.914246	0.863113	0.536168	0.61205	0.735997	-0.771049	-0.701166	-0.425469	0.420473	-2.18436
AT1G24020	Q93VR4	MLP-like protein 423	MLP423	ML423_ARATH	MLP423	defense response		membrane	5	5	5	45.2	45.2	45.2	17.054	37.703	765690000	56	3.26262	0.00366667	-1.1724	-5.54175				-0.505497	-1.18764	-0.27149	-1.38068	-0.879638	1.36464	1.40602	0.633038	0.45026	0.370987
AT5G19820	Q93VS8		emb2734	Q93VS8_ARATH	emb2734	NLS-bearing protein import into nucleus;positive regulation of primary miRNA processing;protein import into nucleus, translocation;ribosomal protein import into nucleus	nuclear localization sequence binding;protein transporter activity	cell wall;cytoplasm;cytosol;nuclear membrane;nuclear periphery	30	30	30	44.9	44.9	44.9	123.82	323.31	2781200000	426	2.11434	0.0249255	0.332517	3.53414				0.974178	0.600723	0.163556	0.132074	1.83289	-0.930619	0.15907	-0.382996	-1.27839	-1.27048
AT5G08540	Q93VT6		At5g08540	Q93VT6_ARATH	MAH20.10		methyltransferase activity	chloroplast;chloroplast envelope;chloroplast thylakoid membrane;plastid	16	16	16	43.4	43.4	43.4	38.655	152.99	2148100000	211	2.6372	0.0117229	0.434818	4.39384				0.533679	1.01895	0.63649	0.180441	1.61892	-0.882239	-1.15826	-1.05403	0.255827	-1.14978
AT5G24690	Q93W02			Q93W02_ARATH	MXC17.8			chloroplast;chloroplast envelope;chloroplast inner membrane;mitochondrion;plastid	13	13	13	31.3	31.3	31.3	56.812	288.21	1278900000	110	1.71506	0.04688	0.478379	2.92063				1.49812	0.890561	-0.0986771	1.133	-0.0155477	0.255399	-1.06135	-0.0793634	-1.64204	-0.880111
AT5G03630	Q93WJ8	Probable monodehydroascorbate reductase, cytoplasmic isoform 4		MDAR2_ARATH	MDAR2	response to cadmium ion;response to salt stress;response to zinc ion	flavin adenine dinucleotide binding;monodehydroascorbate reductase (NADH) activity	chloroplast stroma;cytosol	22	22	22	70.3	70.3	70.3	47.479	323.31	6694300000	357	2.61258	0.0121717	-0.616383	-4.35156	Catalyzes the conversion of monodehydroascorbate toascorbate, oxidizing NADH in the process		Cytoplasm {ECO:0000305}.	-1.14281	0.0927516	0.042441	-1.61716	-1.35235	0.794185	0.588035	0.826399	0.974481	0.794022
AT5G46800	Q93XM7	Mitochondrial carnitine/acylcarnitine carrier-like protein	BOU	MCAT_ARATH	BOU	mitochondrial L-ornithine transmembrane transport;mitochondrial transport	L-ornithine transmembrane transporter activity	chloroplast;integral component of membrane;mitochondrial inner membrane;mitochondrion;plastid	13	13	13	57.3	57.3	57.3	31.022	260.81	5183900000	248	1.95329	0.0331442	-0.22333	-3.28315	Involved in photorespiratory metabolism. Acts probablyas a carrier for a glycine decarboxylase (GDC) cofactor or,alternatively, may act as a mitochondrial glycine shuttle.Involved in the transition from the embryonic stage to thejuvenile autotrophic stage.	High expression in cotyledons, leaves, flowersand developing siliques. Lower expression in roots and maturingsiliques. Not detected in meristematic tissues.{ECO:0000269|PubMed:23181524}.	Multi-pass membrane protein {ECO:0000269|PubMed:12215513,ECO:0000269|PubMed:14671022}.;Mitochondrion inner membrane{ECO:0000269|PubMed:12215513, ECO:0000269|PubMed:14671022}	-1.00552	0.0893423	-0.615374	-1.59321	-0.46896	1.45572	-0.194891	0.479722	1.53472	0.318453
AT2G20230	Q93XY5	Tetraspanin-18	TOM2AH2	TET18_ARATH	TOM2AH2			integral component of membrane;vacuolar membrane;vacuole	4	4	4	21.9	21.9	21.9	29.721	77.912	306980000	47	2.21463	0.0221294	-0.428373	-3.69337	May be involved in the regulation of celldifferentiation.	Expressed in rosette leaves.{ECO:0000269|PubMed:18474569}.	Multi-pass membrane protein{ECO:0000255}.; Multi-pass membraneprotein {ECO:0000305}. Vacuole membrane{ECO:0000269|PubMed:17151019};Membrane {ECO:0000250}	-1.15729	-0.896497	0.318249	-1.23524	-0.795185	0.672861	1.12762	1.67735	0.0484846	0.239641
AT5G64940	Q93Y08		MXK3.17	AB1K8_ARATH	ABC1K8	cellular response to oxidative stress;circadian rhythm;iron ion homeostasis;leaf senescence;membrane lipid biosynthetic process;regulation of response to reactive oxygen species;response to cadmium ion;response to high light intensity;response to hydrogen peroxide;response to iron ion starvation;response to oxidative stress	ATP binding;kinase activity;transporter activity	chloroplast;chloroplast envelope;chloroplast membrane;integral component of membrane	11	11	11	19.2	19.2	19.2	86.022	10.903	305920000	60	1.73816	0.0458209	0.437598	2.9554	Involved in resistance to oxidative stress (e.g.hydrogen peroxide H(2)O(2)), high light and heavy metals (e.g.cadmium ions Cd(2+)) (PubMed:18390807, PubMed:24117441).Influences responses to reactive oxygen species (ROS) production.Together with SIA1, regulates iron distribution within thechloroplast and mediates the oxidative stress response(PubMed:24117441). Together with ABC1K7, influences chlo…	Mostly expressed in leaves and flowers, and,to a lower extent, in stems, siliques and roots.{ECO:0000269|PubMed:18390807, ECO:0000269|PubMed:24117441}.	Single-pass membrane protein{ECO:0000255}.;Plastid, chloroplast envelope{ECO:0000269|PubMed:18390807, ECO:0000269|PubMed:24117441}.Plastid, chloroplast membrane {ECO:0000269|PubMed:18390807,ECO:0000269|PubMed:24117441}	0.721612	-0.243919	0.095857	1.74644	1.10692	-1.22066	-0.481581	-0.448636	-1.47406	0.198031
AT2G31810	Q93YZ7;Q93YZ7-3;Q93YZ7-2	Acetolactate synthase small subunit 2, chloroplastic		ILVH2_ARATH		isoleucine biosynthetic process;regulation of catalytic activity;valine biosynthetic process	acetolactate synthase activity;protein self-association	acetolactate synthase complex;chloroplast;cytosol;peroxisome	14	14	13	38.9	38.9	37.5	53.872	59.197	445260000	76	3.01715	0.00523457	1.04996	5.07313	Regulatory subunit of acetohydroxy-acid synthase.Involved in the feed-back inhibition by branched-chain aminoacids. Contains 2 repeats, each of them being able to activatepartially the catalytic subunit. The enzyme reconstituted with thefirst repeat is inhibited by leucine, but not by valine orisoleucine and the enzyme reconstituted with the second repeat isnot inhibited by any branched-chain ami…		Plastid, chloroplast {ECO:0000305}.	1.29994	0.327586	0.336774	1.0551	1.12362	-0.860971	-0.693962	0.031843	-1.47999	-1.13993
AT5G37360	Q93Z11		At5g37360	Q93Z11_ARATH	MNJ8.18			chloroplast;chloroplast thylakoid membrane;integral component of membrane	10	10	10	36.9	36.9	36.9	33.439	71.524	1474700000	148	1.72916	0.0461878	-0.42755	-2.94185				-1.20549	0.257955	-0.316664	-0.486943	-1.66822	0.92474	1.70949	0.657975	0.329436	-0.202276
AT1G32440	Q93Z53	Plastidial pyruvate kinase 3, chloroplastic	PKP3	PKP3_ARATH	PKP3	cellular response to insulin stimulus;glycolytic process;seed maturation	ATP binding;kinase activity;magnesium ion binding;potassium ion binding;pyruvate kinase activity	chloroplast;chloroplast stroma;cytoplasm	8	6	6	14.5	10.9	10.9	62.614	6.9307	176320000	32	2.38786	0.0175745	0.711226	3.97436	Required for plastidial pyruvate kinase activity	Expressed at low levels in roots, leaves,inflorescences, siliques, pollen, seeds and flowers.{ECO:0000269|PubMed:17557808, ECO:0000269|PubMed:17892448}.	Plastid, chloroplast stroma{ECO:0000269|PubMed:17557808, ECO:0000269|PubMed:18431481}.	0.695822	1.79095	0.258787	1.07422	0.0448713	-0.883556	-1.29813	-0.930837	-0.86097	0.108839
AT5G17000	Q93Z72;A0A1P8BEE4		At5g17000	Q93Z72_ARATH			oxidoreductase activity		11	5	4	46.1	29.6	22.3	38.115	21.219	509270000	46	1.86913	0.0371429	0.615137	3.154				0.977601	-0.503728	0.58862	0.543415	1.9255	0.0952046	-1.19604	-0.955735	-0.719596	-0.755245
AT1G13280	Q93ZC5	Allene oxide cyclase 4, chloroplastic	AOC4	AOC4_ARATH	AOC4	jasmonic acid biosynthetic process	allene-oxide cyclase activity	chloroplast;plasma membrane	6	5	5	37.4	34.3	34.3	27.809	16.707	1867500000	48	3.77113	0.00203175	-1.03776	-6.60001	Involved in the production of 12-oxo-phytodienoic acid(OPDA), a precursor of jasmonic acid.	Highly expressed in fully developed leaves.{ECO:0000269|PubMed:12777050}.	Plastid, chloroplast{ECO:0000269|PubMed:12777050}.	-0.26457	-0.741286	-1.04158	-1.70833	-0.604165	0.517149	0.977296	1.04826	0.767754	1.04947
AT4G33680	Q93ZN9	LL-diaminopimelate aminotransferase, chloroplastic	DAP	DAPAT_ARATH	DAP	lysine biosynthetic process via diaminopimelate;response to cytokinin;systemic acquired resistance, salicylic acid mediated signaling pathway	copper ion binding;L,L-diaminopimelate aminotransferase activity;pyridoxal phosphate binding;transaminase activity	chloroplast;chloroplast stroma	22	22	22	64.2	64.2	64.2	50.396	289.68	5906000000	319	2.46677	0.0153948	0.28528	4.10508	Required for lysine biosynthesis. Catalyzes the directconversion of tetrahydrodipicolinate to LL-diaminopimelate, areaction that requires three enzymes in E.coli. Not active withmeso-diaminopimelate, lysine or ornithine as substrates	Highly expressed in seedlings, roots, stems,flowers and leaves. Lower expression in siliques.{ECO:0000269|PubMed:14729919}.	Plastid, chloroplast{ECO:0000269|PubMed:14729919}.	0.556261	-0.0644879	0.380777	1.69007	1.34341	-0.305197	-1.03331	-0.387659	-1.40082	-0.779043
AT1G10510	Q93ZV8		emb2004	Q93ZV8_ARATH	emb2004			chloroplast;chloroplast envelope;mitochondrion;plastid	13	13	13	31.6	31.6	31.6	64.722	40.896	641110000	98	2.30746	0.0196184	0.37493	3.84295				1.64159	-0.0206704	0.0256068	0.697065	1.47665	-0.401865	-0.401538	-0.599971	-1.07734	-1.33953
AT4G25900	Q940G5		F14M19.180	Q940G5_ARATH		carbohydrate metabolic process	carbohydrate binding;glucose-6-phosphate 1-epimerase activity	cell wall;plant-type cell wall;plasma membrane	11	11	11	45.3	45.3	45.3	36.251	29.633	2031500000	115	2.10475	0.0252842	-0.844774	-3.51904				-1.56674	-0.196407	0.0453578	-1.00173	-0.97769	0.623359	0.413553	-0.0735695	1.01816	1.71572
AT5G03880	Q940I2		MED24.18	Q940I2_ARATH	MED24.18	cell redox homeostasis	electron transfer activity	chloroplast;chloroplast envelope;chloroplast thylakoid;chloroplast thylakoid membrane	10	10	10	55.2	55.2	55.2	37.04	164.26	4087200000	188	1.94764	0.0335672	-0.258727	-3.27442				-0.596081	-0.838651	-0.230573	-0.248103	-1.67624	2.01173	0.870363	0.180927	0.406233	0.12039
AT1G48600	Q944H0-2;Q944H0	Phosphomethylethanolamine N-methyltransferase	NMT2	PEAM2_ARATH	NMT2	phosphatidylcholine biosynthetic process	phosphoethanolamine N-methyltransferase activity;phosphomethylethanolamine N-methyltransferase activity	cytoplasm	15	15	8	41.3	41.3	25.3	54.018	60.205	2180100000	216	2.49902	0.0145247	-0.349346	-4.15903	Catalyzes N-methylation of phosphomonomethylethanolamineand phosphodimethylethanolamine, the two methylation stepsrequired to convert phosphomonoethanolamine to phosphocholine.Unlike NMT1, NMT2 cannot utilize phosphoethanolamine as substratein vitro.		Cytoplasm {ECO:0000250}.	-0.941692	-1.00813	-0.894648	-0.806186	-0.271676	1.92204	0.346875	1.29706	0.256752	0.099609
AT2G39050	Q945P1		At2g39050	EULS3_ARATH	EULS3	defense response to bacterium;stomatal closure	carbohydrate binding	cytoplasm;nucleus	2	2	2	7.6	7.6	7.6	35.647	6.2945	73406000	21	1.80216	0.0409513	-1.07314	-3.05211	Lectin which binds carbohydrates in vitro. Interactsthrough its lectin domain with glycan structures containing one ormore Lewis X, Lewis Y or lactosamine motifs (PubMed:21945438). Mayplay a role in abiotic stress responses (Probable). May play arole in abscisic acid-induced stomatal closure. May play a role indisease resistance against Pseudomonas syringae through itsinvolvement in stomatal move…	Expressed in roots, rosette leaves, stems,cauline leaves and flowers. {ECO:0000269|PubMed:26259197}.	Nucleus {ECO:0000269|PubMed:21945438}.Cytoplasm {ECO:0000269|PubMed:21945438}.	-1.39305	0.0450426	-1.69876	0.605754	-1.03815	1.07881	0.434739	0.557121	0.893637	0.514866
AT5G12140	Q945Q1	Cysteine proteinase inhibitor 1	CYS1	CYT1_ARATH	CYS1	cellular response to cold;cellular response to heat;cellular response to water deprivation;defense response;response to wounding	cysteine-type endopeptidase inhibitor activity	cytosol;endoplasmic reticulum;plasma membrane;vacuolar membrane	2	2	2	28.7	28.7	28.7	11.255	23.738	135530000	29	1.76273	0.0437358	1.21111	2.99246	Involved in suppression of hypersensitive cell deathactivated by either avirulent pathogen or oxidative stress	Expressed in roots and developing siliques.{ECO:0000269|PubMed:12787025}.		0.369129	0.68884	0.780314	0.899296	0.709674	-1.28128	-2.03888	-0.656361	0.0428011	0.486462
AT2G17340	Q949P3;A0A178VSI6;B9DH75	Uncharacterized protein At2g17340		Y2734_ARATH					14	14	13	62.7	62.7	59.7	40.857	166.36	1951900000	202	2.15729	0.0231123	0.217959	3.60205				0.463608	-0.235189	1.49378	1.1407	0.867822	-0.466985	-0.332831	-0.0895034	-1.23304	-1.60836
AT4G26970	Q94A28	Aconitate hydratase 3, mitochondrial	ACO3	ACO2M_ARATH	ACO2	citrate metabolic process;glyoxylate cycle;isocitrate metabolic process;response to cadmium ion;response to iron ion starvation;response to oxidative stress;tricarboxylic acid cycle	4 iron, 4 sulfur cluster binding;aconitate hydratase activity;copper ion binding	chloroplast;cytosol;mitochondrion	41	39	39	51.9	50.4	50.4	108.48	323.31	7935400000	748	3.40568	0.00324752	-0.443592	-5.82692	Catalyzes the isomerization of citrate to isocitrate viacis-aconitate. Contributes to oxidative stress tolerance(PubMed:17013749). Involved in acetate assimilation(PubMed:25061985).	Mostly expressed in roots, leaves and flowers,also present in stems, and, at low levels, in seeds.{ECO:0000269|PubMed:17437406}.	Mitochondrion {ECO:0000269|PubMed:14671022}.	-0.809602	-0.730139	-0.239815	-1.62258	-0.865117	0.377141	0.901439	0.579559	1.50463	0.904492
AT1G69830	Q94A41	Alpha-amylase 3, chloroplastic	AMY3	AMY3_ARATH	AMY3	starch catabolic process	alpha-amylase activity;alpha-amylase activity (releasing maltohexaose);calcium ion binding	chloroplast;chloroplast stroma	35	35	35	45.8	45.8	45.8	99.841	208.33	4160600000	402	2.9062	0.00738983	-0.25524	-4.86929	Possesses endoamylolytic activity in vitro, but seemsnot required for breakdown of transitory starch in leaves. May beinvolved in the determination of the final structure of glucans byshortening long linear phospho-oligosaccharides in the chloroplaststroma. Can act on both soluble and insoluble glucan substrates torelease small linear and branched malto-oligosaccharides(PubMed:24089528). Works sy…	Expressed in developing siliques.{ECO:0000269|PubMed:15927942}.	Plastid, chloroplast{ECO:0000269|PubMed:15637061, ECO:0000269|PubMed:21294843}.	-1.04163	-0.255541	-1.57303	-0.673518	-0.557929	0.0391471	0.589818	1.4552	1.24135	0.776137
AT1G06690	Q94A68	Uncharacterized oxidoreductase At1g06690, chloroplastic		Y1669_ARATH			oxidoreductase activity	chloroplast;chloroplast envelope;chloroplast thylakoid membrane;plastoglobule	15	15	15	57.6	57.6	57.6	41.497	120.71	2284500000	221	1.82552	0.0393797	0.3344	3.08758			Plastid, chloroplast, plastoglobule{ECO:0000269|PubMed:22274653}.	-0.335868	0.491635	0.516692	1.59004	1.23517	-0.995623	-0.576912	-1.06278	-1.29697	0.434618
AT5G11880	Q94A94	Diaminopimelate decarboxylase 2, chloroplastic	LYSA2	DCDA2_ARATH	LYSA2	lysine biosynthetic process via diaminopimelate	diaminopimelate decarboxylase activity	chloroplast;chloroplast stroma;cytosol	20	20	7	47.4	47.4	13.7	54.163	109.93	3311000000	227	3.37542	0.00303704	0.396465	5.76583	Specifically catalyzes the decarboxylation of meso-diaminopimelate (meso-DAP) to L-lysine		Plastid, chloroplast {ECO:0000305}.	1.36933	1.13505	0.0868868	0.676884	0.99047	-0.25316	-0.671954	-0.850492	-1.0568	-1.42621
AT1G15750;AT1G80490	Q94AI7;Q0WV90-1;Q0WV90;F4J043;Q27GK7;Q27GK7-2	Protein TOPLESS;Topless-related protein 1	TPL;TPR1	TPL_ARATH;TPR1_ARATH	TPL;TPR1	jasmonic acid mediated signaling pathway;negative regulation of transcription, DNA-templated;primary shoot apical meristem specification;regulation of transcription, DNA-templated;response to auxin;xylem and phloem pattern formation	identical protein binding;protein homodimerization activity	cytosol;nucleus	9	9	6	9.5	9.5	6.5	124.3	16.347	544130000	95	3.19666	0.004	-0.70734	-5.41332	Transcriptional corepressor. Activates TIR-NB-LRR Rprotein-mediated immune responses through repression of negativeregulators such as CNGC2/DND1 (PubMed:20647385). Negativeregulator of jasmonate responses (By similarity).;Transcriptional corepressor. May repress the expressionof root-promoting genes in the top half of the embryo to allowproper differentiation of the shoot pole during the transiti…	Expressed in embryo and in extraembryonictissues (PubMed:16763149). Expressed in inflorescences, flowers,floral meristems, developing anthers and ovules (PubMed:16461579).Detected in the vascular tissues, shoot apical meristem,cotyledons and young leaves (PubMed:23444332). Expressedubiquitously in the pistils, stamens and pollens(PubMed:25378179). {ECO:0000269|PubMed:16461579,ECO:0000269|PubMed:1…	Nucleus {ECO:0000269|PubMed:16763149,ECO:0000269|PubMed:18258861, ECO:0000269|PubMed:27015278}.;Nucleus {ECO:0000269|PubMed:20647385}.	0.235128	-0.662837	-0.98356	-1.24078	-1.55209	0.977945	0.747379	0.898145	0.693961	0.886709
AT4G34350	Q94B35	4-hydroxy-3-methylbut-2-enyl diphosphate reductase, chloroplastic	ISPH	ISPH_ARATH	ISPH	dimethylallyl diphosphate biosynthetic process;isopentenyl diphosphate biosynthetic process, methylerythritol 4-phosphate pathway	3 iron, 4 sulfur cluster binding;4-hydroxy-3-methylbut-2-en-1-yl diphosphate reductase activity;4-hydroxy-3-methylbut-2-en-1-yl diphosphate synthase activity;metal ion binding	chloroplast;chloroplast stroma	15	15	15	41	41	41	52.78	33.49	1070600000	153	2.35702	0.0180341	0.48222	3.92375	Enzyme of the plastid non-mevalonate pathway forisoprenoid biosynthesis that converts 1-hydroxy-2-methyl-2-(E)-butenyl 4-diphosphate into isopentenyl diphosphate (IPP) anddimethylallyl diphosphate (DMAPP). Is essential for chloroplastdevelopment.	Expressed in roots, stems, leaves, flowers andsiliques. {ECO:0000269|PubMed:15863698}.	Plastid, chloroplast stroma{ECO:0000269|PubMed:18236010}.	0.47989	0.681193	-0.217718	1.90605	0.998482	-0.139202	-0.800738	-1.2831	-0.78684	-0.838021
AT5G19140	Q94BR2;F4JZM6;A0A1P8B9Q2		AILP1	A0A1P8B9Q2_ARATH;F4JZM6_ARATH;Q94BR2_ARATH	AILP1			plasma membrane	10	10	10	66.7	66.7	66.7	25.015	131.98	1888700000	174	2.4521	0.0155491	-0.466402	-4.08064				-0.617089	-0.179936	-0.0129507	-1.10512	-1.9834	0.681609	0.845247	0.531759	0.547702	1.29218
AT5G20280	Q94BT0;Q8RY24	Sucrose-phosphate synthase 1	SPS1	SPSA1_ARATH	SPS1	nectar secretion;sucrose biosynthetic process	sucrose-phosphate synthase activity	cytosol;plasma membrane;plasmodesma	22	22	20	27.2	27.2	25.4	117.32	74.164	2036900000	244	2.99197	0.00592771	-0.457367	-5.02645	Plays a major role in photosynthetic sucrose synthesisby catalyzing the rate-limiting step of sucrose biosynthesis fromUDP-glucose and fructose- 6-phosphate. Involved in the regulationof carbon partitioning in the leaves of plants. May regulate thesynthesis of sucrose and therefore play a major role as a limitingfactor in the export of photoassimilates out of the leaf. Plays arole for sucrose ava…	Expressed in seeds, stems, rosette leaves,flowers and siliques. Highly expressed in maturing nectaries.{ECO:0000269|PubMed:21309792, ECO:0000269|PubMed:24670640}.		0.170172	-0.987401	-0.409156	-1.42923	-1.47826	0.896628	0.981543	0.943464	0.858895	0.453347
AT3G10270;AT5G04130	Q94BZ7;Q94BZ7-2;A0A1I9LTQ6;Q9SS38	DNA gyrase subunit B, mitochondrial;DNA gyrase subunit B, chloroplastic	GYRBM;GYRBC	A0A1I9LTQ6_ARATH;GYRBM_ARATH;GYRBP_ARATH	GYRB1;GYRBC;GYRBM	DNA topological change	ATP binding;DNA binding;DNA topoisomerase type II (ATP-hydrolyzing) activity;metal ion binding	chloroplast;chromosome;mitochondrion	6	6	6	10.4	10.4	10.4	81.052	12.285	103110000	24	1.86239	0.0373527	0.659478	3.14371	A type II topoisomerase that negatively supercoilsclosed circular double-stranded DNA in an ATP-dependent manner		Mitochondrion {ECO:0000269|PubMed:15136745}.;Plastid, chloroplast{ECO:0000269|PubMed:15136745}.	0.244542	1.3013	0.6056	-0.398338	1.77315	-0.153933	-0.453175	-1.49643	-0.93144	-0.491281
AT1G30690	Q94C59	Patellin-4	PATL4	PATL4_ARATH	PATL4	cell cycle;cell division	lipid binding	cytosol;nucleus;plasma membrane	12	12	12	27.8	27.8	27.8	61.189	100.82	1494800000	148	2.0781	0.0270928	0.402669	3.47719	Carrier protein that may be involved in membrane-trafficking events associated with cell plate formation duringcytokinesis. Binds to some hydrophobic molecules such asphosphoinositides and promotes their transfer between thedifferent cellular sites (By similarity).		Peripheral membraneprotein {ECO:0000250}. Cytoplasm {ECO:0000250}. Note=Mainlymembrane-associated. Also cytoplasmic (By similarity).{ECO:0000250}.;Membrane {ECO:0000250}	1.02357	1.31369	0.847121	0.740273	-0.244888	-0.0779485	-1.37942	0.164554	-1.43452	-0.952435
AT1G70410	Q94CE4-2	Beta carbonic anhydrase 4	BCA4	BCA4_ARATH	BCA4	carbon utilization;negative regulation of stomatal complex development;regulation of stomatal movement;response to carbon dioxide	carbonate dehydratase activity;zinc ion binding	chloroplast envelope;cytoplasm;plasma membrane	23	23	1	92.2	92.2	3.9	28.412	242.65	6940400000	289	2.56371	0.0132245	0.245681	4.26821	Reversible hydration of carbon dioxide. Together withBCA1, involved in the CO(2) signaling pathway which controls gas-exchange between plants and the atmosphere by modulating stomataldevelopment and movements. Promotes water use efficiency	Strongly expressed in aerial tissues includingleaves, stems, flowers and siliques. Accumulates in both guardcells and mesophyll cells. {ECO:0000269|PubMed:17407539,ECO:0000269|PubMed:20010812}.	Peripheral membrane protein{ECO:0000269|PubMed:17407539, ECO:0000269|PubMed:20010812}.;Cell membrane {ECO:0000269|PubMed:17407539,ECO:0000269|PubMed:20010812}	1.1027	0.144982	1.24905	1.05961	0.397693	-1.29211	-0.558954	-0.552287	0.071026	-1.6217
AT5G12470	Q94CJ5		At5g12470	RER4_ARATH	RER4	multicellular organism development		chloroplast;chloroplast envelope;chloroplast inner membrane;integral component of membrane;mitochondrion;plastid	10	10	10	34.7	34.7	34.7	41.323	73.853	1338800000	189	1.71411	0.0469183	-0.316478	-2.9192	May play a role in leaf development		Multi-pass membrane protein{ECO:0000255}.;Plastid, chloroplast membrane{ECO:0000250|UniProtKB:Q9C9Z2}	-1.7178	0.0784217	-0.698067	-0.211289	-0.857914	-0.321402	0.246342	0.571243	1.6123	1.29816
AT3G62530	Q94K48		At3g62530	Q94K48_ARATH			metal ion binding;zinc ion binding	chloroplast;mitochondrion;nucleolus	12	12	12	57.9	57.9	57.9	24.503	79.768	559770000	94	2.16933	0.0229444	0.807367	3.62116				0.166341	0.137664	0.402077	1.30034	1.73181	-0.398923	-1.70364	-0.249826	-0.786349	-0.599496
AT3G58140	Q94K73	Phenylalanine--tRNA ligase, chloroplastic/mitochondrial		SYFM_ARATH		phenylalanyl-tRNA aminoacylation	ATP binding;phenylalanine-tRNA ligase activity;tRNA binding	chloroplast;chloroplast stroma;cytoplasm;membrane;mitochondrial matrix;mitochondrion	16	16	16	40.3	40.3	40.3	49.251	298.16	3052600000	267	3.53443	0.00289362	0.470212	6.09172	Is responsible for the charging of tRNA(Phe) withphenylalanine in mitochondrial translation.		Plastid, chloroplast stroma{ECO:0000269|PubMed:16251277, ECO:0000269|PubMed:17433818,ECO:0000269|PubMed:18431481}. Mitochondrion matrix{ECO:0000269|PubMed:16251277, ECO:0000269|PubMed:17433818,ECO:0000269|PubMed:18431481}.	0.859533	0.553599	0.800951	0.544399	1.5438	-0.257307	-1.31305	-0.435488	-1.05676	-1.23968
AT5G24490	Q94K97		At5g24490	Q94K97_ARATH		negative regulation of translational elongation;primary metabolic process	ribosomal small subunit binding;ribosome binding	chloroplast;chloroplast stroma;chloroplast thylakoid;cytosolic small ribosomal subunit	12	12	12	36.7	36.7	36.7	34.856	195.5	8328700000	189	3.60042	0.00273171	0.663033	6.23055				0.808372	0.39604	0.950371	1.34225	0.822169	-0.936184	-1.33186	0.00278172	-1.18392	-0.870013
AT5G42650	Q96242	Allene oxide synthase, chloroplastic	CYP74A	CP74A_ARATH	CYP74A	defense response;defense response to fungus;epoxygenase P450 pathway;jasmonic acid biosynthetic process;oxidation-reduction process;oxylipin biosynthetic process;oxylipin metabolic process;response to fungus;response to jasmonic acid;response to wounding;sterol metabolic process	allene oxide synthase activity;heme binding;hydroperoxide dehydratase activity;iron ion binding;oxidoreductase activity, acting on paired donors, with incorporation or reduction of molecular oxygen;oxygen binding	chloroplast;chloroplast envelope;chloroplast thylakoid;chloroplast thylakoid membrane;membrane;mitochondrion;plastoglobule;thylakoid	44	44	44	77	77	77	58.196	323.31	20449000000	825	3.15085	0.00469565	-0.413074	-5.32524			Plastid, chloroplast, plastoglobule{ECO:0000269|PubMed:12766230, ECO:0000269|PubMed:16414959,ECO:0000269|PubMed:16461379}.	-1.20169	-0.419636	-0.330865	-1.48261	-0.754383	0.463967	0.938281	0.332572	1.60465	0.849712
AT3G18780	Q96292;F4J8V9	Actin-2	ACT2	ACT2_ARATH;F4J8V9_ARATH	ACT2	response to cytokinin;response to far red light;response to high light intensity;response to red light;root epidermal cell differentiation;root hair cell tip growth;root hair elongation	ATP binding;structural constituent of cytoskeleton	cytoplasm;cytoskeleton;membrane;nucleus	30	18	1	79.3	65.3	5	41.876	280.27	18709000000	386	2.40194	0.0171	-0.295687	-3.99754	Actins are highly conserved proteins that are involvedin various types of cell motility and are ubiquitously expressedin all eukaryotic cells. Essential component of cell cytoskeleton;plays an important role in cytoplasmic streaming, cell shapedetermination, cell division, organelle movement and extensiongrowth. This is considered as one of the vegetative actins.	Strongly expressed in nearly all vegetativetissues, and remains high in older tissues. Little or noexpression is detected in mature pollen sacs, ovules, embryos orseeds.	Cytoplasm, cytoskeleton.	0.205023	-1.58703	-0.145446	-1.15997	-1.18477	1.32715	1.01657	0.76074	0.364222	0.403507
AT1G13110	Q96514;Q9SAE4;Q9LTM0;Q9ZU07;P58050;A0A1I9LMQ2;Q9LTL2;O65786	Cytochrome P450 71B7	CYP71B7	C71B7_ARATH	CYP71B7		heme binding;iron ion binding;oxidoreductase activity, acting on paired donors, with incorporation or reduction of molecular oxygen, NAD(P)H as one donor, and incorporation of one atom of oxygen	integral component of membrane;membrane	19	19	14	39.3	39.3	30.2	57.208	52.736	2501800000	217	1.82544	0.0393016	-0.341003	-3.08746		Highly expressed in rosette leaves. Alsoexpressed in roots, leaves, flowers, and siliques.	Single-pass membraneprotein {ECO:0000305}.;Membrane {ECO:0000305}	-1.59104	-0.241584	0.382261	-0.943213	-1.10403	0.109618	0.446601	0.414125	1.80171	0.725559
AT1G71695	Q96520	Peroxidase 12	PER12	PER12_ARATH	PER12	hydrogen peroxide catabolic process;response to oxidative stress	heme binding;metal ion binding;peroxidase activity	cell wall;extracellular region;membrane;plant-type cell wall;plasmodesma;vacuole	12	12	12	36.3	36.3	36.3	39.559	169.11	4295500000	266	3.13744	0.00459574	-0.500077	-5.29962	Removal of H(2)O(2), oxidation of toxic reductants,biosynthesis and degradation of lignin, suberization, auxincatabolism, response to environmental stresses such as wounding,pathogen attack and oxidative stress. These functions might bedependent on each isozyme/isoform in each plant tissue.Exhibits a Ca(2+)-pectate binding affinity which couldbe interpreted in vivo as a specificity to interact wi…	Expressed in roots and leaves.	Secreted {ECO:0000305}. Vacuole{ECO:0000305}. Note=Carboxy-terminal extension appears to targetthe protein to vacuoles.	-1.1893	-0.429944	-0.0396592	-1.05092	-1.4749	0.879132	0.687925	0.466029	1.48892	0.66272
AT1G20630	Q96528	Catalase-1	CAT1	CATA1_ARATH	CAT1	cellular response to nitrogen starvation;cellular response to phosphate starvation;cellular response to sulfate starvation;hydrogen peroxide catabolic process;response to abscisic acid;response to cadmium ion;response to hydrogen peroxide;response to light stimulus	catalase activity;cobalt ion binding;heme binding	cell wall;chloroplast envelope;cytosolic ribosome;mitochondrion;peroxisome	21	7	7	45.3	19.5	19.5	56.761	60.061	403800000	94	2.76056	0.00943541	0.525414	4.60871	Occurs in almost all aerobically respiring organisms andserves to protect cells from the toxic effects of hydrogenperoxide.		Cytoplasm {ECO:0000305}.	0.876909	0.208756	0.0568591	1.21228	1.68798	-0.28487	-1.32538	-0.897976	-0.915165	-0.61939
AT5G43940	Q96533;F4K7D6	Alcohol dehydrogenase class-3;S-(hydroxymethyl)glutathione dehydrogenase	ADH2;HOT5	ADHX_ARATH;F4K7D6_ARATH	ADH2;HOT5	cell death;ethanol oxidation;formaldehyde catabolic process;formaldehyde metabolic process;heat acclimation;seed development	alcohol dehydrogenase activity, zinc-dependent;S-(hydroxymethyl)glutathione dehydrogenase activity;S-nitrosoglutathione reductase activity;zinc ion binding	cytosol;peroxisome	22	22	22	64.1	64.1	64.1	40.698	194.91	6500000000	241	6.24074	0	-7.54705	-14.2458	Plays a central role in formaldehyde detoxification	Ubiquitous. {ECO:0000269|PubMed:8944774}.	Cytoplasm {ECO:0000250|UniProtKB:P06525}.	-0.936752	-1.11173	-1.17959	-0.867531	-0.556998	1.08143	0.87882	0.954311	0.682808	1.05523
AT1G73110	Q9AST9;A0A1P8ATD8			A0A1P8ATD8_ARATH;Q9AST9_ARATH			ATP binding;hydrolase activity	chloroplast;chloroplast thylakoid membrane	13	13	13	42.1	42.1	42.1	48.325	232.09	932350000	147	3.24328	0.00383607	0.673211	5.50391				1.34282	0.142838	0.75053	1.29016	0.692591	-0.824361	-1.48444	-0.149114	-0.79989	-0.961133
AT3G15190	Q9ASV6	30S ribosomal protein S20, chloroplastic	RPS20	RR20_ARATH	RPS20	translation	small ribosomal subunit rRNA binding;structural constituent of ribosome	chloroplast;chloroplast envelope;chloroplast stroma;membrane;ribosome	8	8	8	31.7	31.7	31.7	21.826	141.03	1387700000	122	1.94175	0.0336561	0.504344	3.26536	Binds directly to 16S ribosomal RNA.		Plastid, chloroplast {ECO:0000250}.	0.235214	-0.318725	1.06507	1.37143	1.2324	-0.0428183	-1.54614	-0.46541	-1.27936	-0.251665
AT1G66430	Q9C524	Probable fructokinase-6, chloroplastic		SCRK6_ARATH		carbohydrate biosynthetic process;fatty acid biosynthetic process;fructose metabolic process;starch biosynthetic process	ATP binding;carbohydrate kinase activity;fructokinase activity	chloroplast;chloroplast stroma;cytosol	12	12	12	43.5	43.5	43.5	41.471	225.54	734020000	108	1.89607	0.0357944	-0.606907	-3.19521	May play an important role in maintaining the flux ofcarbon towards starch formation.		Plastid, chloroplast {ECO:0000255}.	-0.264379	-0.839832	-0.0513324	-1.03772	-1.35849	1.72745	0.738658	1.04249	0.605694	-0.562535
AT1G74040	Q9C550;A0A1P8AUZ8;A0A1P8AV04	2-isopropylmalate synthase 2, chloroplastic	IPMS2	A0A1P8AUZ8_ARATH;A0A1P8AV04_ARATH;LEU12_ARATH	IMS1;IPMS2	carboxylic acid metabolic process;leucine biosynthetic process	2-isopropylmalate synthase activity;lyase activity;transferase activity, transferring acyl groups, acyl groups converted into alkyl on transfer	chloroplast;chloroplast envelope	16	4	3	33.6	13	11.1	68.135	53.785	124710000	35	2.07856	0.0272021	0.752356	3.4779	Catalyzes the condensation of the acetyl group ofacetyl-CoA with 3-methyl-2-oxobutanoate (2-oxoisovalerate) to form3-carboxy-3-hydroxy-4-methylpentanoate (2-isopropylmalate).Involved in Leu biosynthesis, but do not participate in the chainelongation of glucosinolates.	Expressed in roots, stems, leaves, flowers andsiliques. {ECO:0000269|PubMed:12432038,ECO:0000269|PubMed:17189332}.	Plastid, chloroplast {ECO:0000305}.	2.0348	0.317134	0.0687244	1.22225	0.0371642	-1.18343	-0.300884	-0.467496	-0.696806	-1.03146
AT5G25980	Q9C5C2;Q9C5C2-2	Myrosinase 2	TGG2	BGL37_ARATH	TGG2	abscisic acid-activated signaling pathway;carbohydrate metabolic process;defense response to insect;glucosinolate catabolic process;regulation of stomatal movement;response to abscisic acid;response to salt stress	beta-glucosidase activity;glucosinolate glucohydrolase activity;thioglucosidase activity	apoplast;chloroplast;cytosolic ribosome;peroxisome;plasmodesma;vacuole	34	33	30	58.7	56.7	56.7	62.731	323.31	50762000000	757	7.47574	0	-2.67847	-20.5087	May degrade glucosinolates (glucose residue linked by athioglucoside bound to an amino acid derivative) to glucose,sulfate and any of the products: thiocyanates, isothiocyanates,nitriles, epithionitriles or oxazolidine-2-thiones. These toxicdegradation products can deter insect herbivores. Seems tofunction in abscisic acid (ABA) and methyl jasmonate (MeJA)signaling in guard cells. Functionally re…	Expressed in phloem-associated cells.{ECO:0000269|PubMed:16640593}.		-0.953829	-0.789712	-0.765028	-1.1035	-1.08687	0.773203	1.10968	0.875506	0.927339	1.01321
AT4G26270;AT5G56630	Q9C5J7;Q94AA4;Q9M076	ATP-dependent 6-phosphofructokinase 7;ATP-dependent 6-phosphofructokinase 3	PFK7;PFK3	PFKA3_ARATH;PFKA7_ARATH	PFK3;PFK7	fructose 6-phosphate metabolic process;glycolytic process;root epidermal cell differentiation	6-phosphofructokinase activity;ATP binding;metal ion binding	cytosol	8	6	6	27.6	26	26	53.481	40.507	270520000	47	3.634	0.00286486	-0.86356	-6.30206	Catalyzes the phosphorylation of D-fructose 6-phosphateto fructose 1,6-bisphosphate by ATP, the first committing step ofglycolysis.	Expressed in roots, leaves, stems and flowers.{ECO:0000269|PubMed:17485088}.;Mostly expressed in roots and flowers.{ECO:0000269|PubMed:17485088}.	Cytoplasm {ECO:0000255|HAMAP-Rule:MF_03186,ECO:0000269|PubMed:17485088}.	-0.918564	-1.1444	-1.43101	0.141253	-0.974836	0.915136	1.01143	0.779998	0.65899	0.961991
AT3G57290	Q9C5Z3	Eukaryotic translation initiation factor 3 subunit E	TIF3E1	EIF3E_ARATH	TIF3E1	DNA-templated transcription, initiation;flower development;formation of cytoplasmic translation initiation complex;photomorphogenesis;response to salt stress;translation;translational initiation	mRNA binding;translation initiation factor activity;translation repressor activity	cytoplasm;cytosol;cytosolic proteasome complex;eukaryotic 43S preinitiation complex;eukaryotic 48S preinitiation complex;eukaryotic translation initiation factor 3 complex;eukaryotic translation initiation factor 3 complex, eIF3e;nucleus;plasma membrane	22	22	22	68.5	68.5	68.5	51.749	136.6	1543600000	191	2.99361	0.00579394	0.55282	5.02947	Component of the eukaryotic translation initiationfactor 3 (eIF-3) complex, which is involved in protein synthesisof a specialized repertoire of mRNAs and, together with otherinitiation factors, stimulates binding of mRNA and methionyl-tRNAito the 40S ribosome. The eIF-3 complex specifically targets andinitiates translation of a subset of mRNAs involved in cellproliferation (Potential). Regulates…		Cytoplasm {ECO:0000255|HAMAP-Rule:MF_03004,ECO:0000269|PubMed:11029466}. Nucleus{ECO:0000269|PubMed:11029466}.	0.852073	0.692506	0.225179	0.488571	1.87615	-0.879496	-0.756207	-0.705242	-1.41347	-0.380055
AT1G73600	Q9C6B9;Q9C6B9-2	Phosphoethanolamine N-methyltransferase 3	NMT3	PEAM3_ARATH	NMT3	phosphatidylcholine biosynthetic process	phosphoethanolamine N-methyltransferase activity	cytoplasm	10	8	7	22.2	17.8	16.1	56.367	20.033	561820000	89	1.87106	0.0370189	-0.490105	-3.15695	Catalyzes N-methylation of phosphoethanolamine,phosphomonomethylethanolamine and phosphodimethylethanolamine, thethree methylation steps required to convert phosphoethanolamine tophosphocholine.		Cytoplasm {ECO:0000250}.	-1.92374	0.0378498	-0.448589	-1.19389	-0.00451351	1.08899	0.748446	0.780179	1.12755	-0.212277
AT1G50940	Q9C6I6	Electron transfer flavoprotein subunit alpha, mitochondrial	ETFA	ETFA_ARATH	ETFA	fatty acid beta-oxidation using acyl-CoA dehydrogenase	copper ion binding;electron transfer activity;flavin adenine dinucleotide binding;oxidoreductase activity	mitochondrial matrix;mitochondrion	7	7	7	24.8	24.8	24.8	38.407	117.16	661480000	72	2.5683	0.0131687	-0.356647	-4.27601	The electron transfer flavoprotein serves as a specificelectron acceptor for several dehydrogenases, including five acyl-CoA dehydrogenases, glutaryl-CoA and sarcosine dehydrogenase. Ittransfers the electrons to the main mitochondrial respiratorychain via ETF-ubiquinone oxidoreductase (ETF dehydrogenase).Involved in leucine catabolism and in phytol degradation (Bysimilarity).		Mitochondrion matrix{ECO:0000269|PubMed:14671022, ECO:0000305|PubMed:25732537}.	-1.40763	-0.174171	-0.202582	-1.59253	-0.579321	0.504093	0.432884	0.565011	0.837872	1.61637
AT1G53580	Q9C8L4;F4HRK0	Persulfide dioxygenase ETHE1 homolog, mitochondrial	GLY3	ETHE1_ARATH;F4HRK0_ARATH	GLY3	embryo development ending in seed dormancy;endosperm development;glutathione metabolic process;hydrogen sulfide metabolic process;response to salt stress;seed development	hydrolase activity, acting on ester bonds;metal ion binding;sulfur dioxygenase activity	mitochondrion	9	9	9	54.1	54.1	54.1	32.332	73.686	989830000	117	2.01565	0.0293365	-0.622853	-3.37969	Sulfur dioxygenase that plays an essential role inhydrogen sulfide catabolism in the mitochondrial matrix. Hydrogensulfide (H(2)S) gives rise to cysteine persulfide residues. ETHE1consumes molecular oxygen to catalyze the oxidation of thepersulfide, once it has been transferred to a thiophilic acceptor,such as glutathione (R-SSH). Plays an important role in metabolichomeostasis in mitochondria by…		Mitochondrion {ECO:0000269|PubMed:22786886}.	-0.0637909	-0.036593	-1.35945	-0.812987	-1.3648	-0.418015	1.39846	0.582027	1.05399	1.02117
AT1G34430	Q9C8P0	Dihydrolipoyllysine-residue acetyltransferase component 5 of pyruvate dehydrogenase complex, chloroplastic	EMB3003	ODP25_ARATH	EMB3003	glycolytic process	dihydrolipoyllysine-residue acetyltransferase activity;protein domain specific binding	chloroplast;chloroplast envelope;chloroplast stroma;cytosolic ribosome;plasma membrane	18	18	16	40.4	40.4	35.1	48.306	191.5	2984300000	313	2.28433	0.0198722	0.518443	3.80548	The pyruvate dehydrogenase complex catalyzes the overallconversion of pyruvate to acetyl-CoA and CO(2). It containsmultiple copies of three enzymatic components: pyruvatedehydrogenase (E1), dihydrolipoamide acetyltransferase (E2) andlipoamide dehydrogenase (E3) (By similarity).		Plastid, chloroplast stroma {ECO:0000250}.	0.713232	0.294524	0.179091	1.90032	0.719865	-0.998168	-0.0723844	-0.316185	-0.884102	-1.53619
AT1G74910	Q9C9P3;F4HXD1;F4IFA4;A0A1P8AZM7		F9E10.24;At1g74910	F4HXD1_ARATH;Q9C9P3_ARATH	F9E10.24	biosynthetic process;regulation of L-ascorbic acid biosynthetic process;response to cadmium ion	nucleotidyltransferase activity;sequence-specific DNA binding	cytosol;peroxisome	14	14	14	44.8	44.8	44.8	45.563	49.641	1809500000	184	2.14734	0.0234891	0.331765	3.58627				1.22121	0.905194	0.315116	1.42627	-0.143338	-0.161915	-0.685094	-1.86146	-0.678944	-0.33705
AT1G68010	Q9C9W5;Q9C9W5-2;A0A1P8ANC0	Glycerate dehydrogenase HPR, peroxisomal	HPR	A0A1P8ANC0_ARATH;HPR1_ARATH	HPR	cellular response to light stimulus;cellular response to water deprivation;oxidative photosynthetic carbon pathway	glycerate dehydrogenase activity;glyoxylate reductase (NADP) activity;hydroxypyruvate reductase activity;NAD binding;oxidoreductase activity, acting on the CH-OH group of donors, NAD or NADP as acceptor;poly(U) RNA binding;protein homodimerization activity	apoplast;chloroplast;cytosol;integral component of membrane;peroxisome	39	39	39	89.4	89.4	89.4	42.247	323.31	49671000000	853	2.22686	0.0216429	0.23816	3.71295	Catalyzes the NADH-dependent reduction ofhydroxypyruvate into glycerate in the photorespiratory core cycle.Mediates fatty acid beta-oxidation in germinating seeds whenmalate dehydrogenase is absent.	Present in leaves (at protein level). Mostlyexpressed in photosynthetic tissues such as leaves, stems,flowers, buds, and, to a lower extent, in siliques and roots.{ECO:0000269|PubMed:19529821, ECO:0000269|PubMed:9177031}.	Peroxisome {ECO:0000269|PubMed:9177031}.	1.51137	-0.278957	0.291267	1.24636	1.00326	-0.371113	-0.519864	-0.380082	-0.857352	-1.64489
AT1G74470	Q9CA67	Geranylgeranyl diphosphate reductase, chloroplastic	CHLP	CHLP_ARATH	CHLP	chlorophyll biosynthetic process;oxidation-reduction process;photosynthesis;vitamin E biosynthetic process	geranylgeranyl diphosphate reductase activity;geranylgeranyl reductase activity;oxidoreductase activity, acting on the CH-CH group of donors	chloroplast;chloroplast envelope;chloroplast membrane;chloroplast thylakoid;chloroplast thylakoid membrane;membrane	31	31	31	60.6	60.6	60.6	51.837	323.31	8882000000	594	1.93268	0.0341292	0.45088	3.25139	Catalyzes the reduction of geranylgeranyl diphosphate tophytyl diphosphate, providing phytol for both tocopherol andchlorophyll synthesis.		Plastid, chloroplast membrane{ECO:0000269|PubMed:22212719}.	1.75626	0.225689	0.176262	0.796494	0.624082	-0.232783	-0.0939501	-0.509984	-0.768096	-1.97398
AT3G10690	Q9CAF6	Probable DNA gyrase subunit A, chloroplastic/mitochondrial	GYRA	GYRA_ARATH	GYRA	DNA topological change	ATP binding;DNA binding;DNA topoisomerase type II (ATP-hydrolyzing) activity	chloroplast;chromosome;cytoplasm;DNA topoisomerase complex (ATP-hydrolyzing);mediator complex;mitochondrion;nucleoid	8	8	8	14.1	14.1	14.1	104.54	28.105	183140000	40	2.07101	0.0272304	0.623684	3.46607	A type II topoisomerase that negatively supercoilsclosed circular double-stranded DNA in an ATP-dependent manner		Plastid, chloroplast{ECO:0000269|PubMed:15136745}. Mitochondrion{ECO:0000269|PubMed:15136745}. Nucleus{ECO:0000305|PubMed:15136745}.	0.471906	0.237944	0.153732	1.63823	1.17326	-1.16477	-0.453695	-0.841151	-1.50994	0.294495
AT1G72680	Q9CAI3	Probable cinnamyl alcohol dehydrogenase 1	CAD1	CADH1_ARATH	CAD1	lignin biosynthetic process	cinnamyl-alcohol dehydrogenase activity;sinapyl alcohol dehydrogenase activity;zinc ion binding	cytosol	8	8	8	33.8	33.8	33.8	38.671	31.218	347560000	58	2.06565	0.0272727	1.22057	3.45769	Involved in lignin biosynthesis. Catalyzes the finalstep specific for the production of lignin monomers. Catalyzes theNADPH-dependent reduction of coniferaldehyde, 5-hydroxyconiferaldehyde, sinapaldehyde, 4-coumaraldehyde andcaffeyl aldehyde to their respective alcohols	Expressed in the vasculature of the primaryroot and elongation regions. Expressed in the hypocotyl, cotyledonveins, vasculature of the first rosette leaves, hydathodes and atthe base of the trichomes. In stems, expressed in the vascularcambium, interfascicular cambium developing xylem and cortexregion. Expressed in the style, the vascular strands of the sepalspollen and anthers in flowers, in the…		0.22474	1.32491	0.640546	1.26239	0.218929	-1.73146	-0.940438	0.0347375	-1.11873	0.0843839
AT1G77590	Q9CAP8;A0A1P8AQK5	Long chain acyl-CoA synthetase 9, chloroplastic	LACS9	A0A1P8AQK5_ARATH;LACS9_ARATH	LACS9	fatty acid metabolic process	ATP binding;catalytic activity;decanoate-CoA ligase activity;long-chain fatty acid-CoA ligase activity	chloroplast;chloroplast envelope;membrane;plastid	12	12	11	25.9	25.9	24.3	76.175	65.574	936890000	126	2.04752	0.0279111	-0.38109	-3.42934	Activation of long-chain fatty acids for both synthesisof cellular lipids, and degradation via beta-oxidation.Preferentially uses palmitate, palmitoleate, oleate and linoleate	Highly expressed in developing seeds and youngrosette leaves. {ECO:0000269|PubMed:12177483}.	Plastid, chloroplast envelope{ECO:0000269|PubMed:12177483}.	-1.00393	0.105896	-1.1493	-0.454441	-1.15758	0.589178	0.144152	1.62189	1.44727	-0.143137
AT5G64050	Q9FEA2	Glutamate--tRNA ligase, chloroplastic/mitochondrial		SYEM_ARATH	OVA3	chloroplast organization;glutamyl-tRNA aminoacylation;mitochondrion organization;plant ovule development	ATP binding;glutamate-tRNA ligase activity;tRNA binding;zinc ion binding	chloroplast;chloroplast stroma;mitochondrion	11	11	11	31.6	31.6	31.6	63.465	69.253	553190000	98	1.7061	0.04787	0.519778	2.90717	Catalyzes the attachment of glutamate to tRNA(Glu) in atwo-step reaction: glutamate is first activated by ATP to formGlu-AMP and then transferred to the acceptor end of tRNA(Glu)		Plastid, chloroplast{ECO:0000269|PubMed:16107332, ECO:0000269|PubMed:16251277,ECO:0000269|PubMed:17433818, ECO:0000269|PubMed:18431481}.Mitochondrion {ECO:0000269|PubMed:16107332,ECO:0000269|PubMed:16251277, ECO:0000269|PubMed:17433818,ECO:0000305|PubMed:25732537}.	0.946336	0.442951	-0.0757393	1.7648	0.321481	-0.0378577	-0.112668	-0.218348	-1.6369	-1.39406
AT3G52180	Q9FEB5;A0A1I9LQR5;A0A1I9LQR6;F4J5T0	Phosphoglucan phosphatase DSP4, chloroplastic	DSP4	A0A1I9LQR5_ARATH;DSP4_ARATH	DSP4;SEX4	circadian rhythm;phosphorylated carbohydrate dephosphorylation;starch catabolic process;starch metabolic process	amylopectin binding;carbohydrate phosphatase activity;polysaccharide binding;protein tyrosine/serine/threonine phosphatase activity;starch binding	chloroplast;chloroplast stroma	19	19	19	47.5	47.5	47.5	42.625	126	1980500000	198	3.80074	0.00206452	-0.904181	-6.66567	Starch granule-associated phosphoglucan phosphataseinvolved in the control of starch accumulation. Acts as majorregulator of the initial steps of starch degradation at thegranule surface. Functions during the day by dephosphorylating thenight-accumulated phospho-oligosaccharides. Can release phosphatefrom both the C6 and the C3 positions, but dephosphorylatespreferentially the C6 position (PubMed…		Plastid, chloroplast{ECO:0000269|PubMed:16513634, ECO:0000269|PubMed:16623901,ECO:0000269|PubMed:16772378}. Note=Associated with starch granule.	-0.637366	-0.298052	-0.573049	-1.33609	-1.52201	0.528658	1.14377	0.772555	1.1093	0.812281
AT5G60640	Q9FF55;F4K0F5;F4K0F7	Protein disulfide isomerase-like 1-4;Protein disulfide-isomerase	PDIL1-4	F4K0F5_ARATH;F4K0F7_ARATH;PDI14_ARATH	PDIL1-4	cell redox homeostasis;protein folding;response to endoplasmic reticulum stress;response to oxidative stress	isomerase activity;protein disulfide isomerase activity	cell;cell wall;chloroplast;endoplasmic reticulum;endoplasmic reticulum lumen;extracellular region;mitochondrion;nucleus;vacuolar membrane	25	25	25	47.7	47.7	47.7	66.356	323.31	4965700000	306	3.59966	0.0026988	-0.572852	-6.22895	Acts as a protein-folding catalyst that interacts withnascent polypeptides to catalyze the formation, isomerization, andreduction or oxidation of disulfide bonds	Expressed in germinating seedling, includingthe cotyledons and hypocotyl, in vascular tissues, in pollengrains, root tips, leaf trichomes, developing seeds and siliques.{ECO:0000269|PubMed:18574595, ECO:0000269|PubMed:21909944}.	Endoplasmic reticulum lumen{ECO:0000255|PROSITE-ProRule:PRU10138,ECO:0000269|PubMed:21909944}. Golgi apparatus{ECO:0000269|PubMed:21909944}. Vacuole{ECO:0000269|PubMed:21909944}. Nucleus{ECO:0000269|PubMed:21909944}. Secreted, cell wall{ECO:0000269|PubMed:21909944}.	-0.985932	-0.316563	-0.36372	-1.36798	-1.28481	1.11939	1.20016	1.06774	0.412104	0.519613
AT5G54960	Q9FFT4;O82647	Pyruvate decarboxylase 2	PDC2	PDC2_ARATH	PDC2	response to hypoxia	carboxy-lyase activity;magnesium ion binding;pyruvate decarboxylase activity;thiamine pyrophosphate binding	cytosol	19	19	19	46	46	46	65.817	217.8	1940200000	198	2.12793	0.0243774	-0.672763	-3.55559		Expressed at low levels in roots, shoots,flowers, siliques and seeds. {ECO:0000269|PubMed:12805625}.		-2.08365	0.0816031	0.078067	-0.762869	-1.02529	0.600467	0.763391	0.544377	0.632014	1.17189
AT5G49360	Q9FGY1	Beta-D-xylosidase 1	BXL1	BXL1_ARATH	BXL1	arabinan catabolic process;seed coat development;xylan catabolic process	alpha-L-arabinofuranosidase activity;xylan 1,4-beta-xylosidase activity	apoplast;plant-type cell wall	9	9	9	18.7	18.7	18.7	83.523	43.762	913840000	132	2.30671	0.0195672	0.550656	3.84173	Involved in pectic arabinan modification in mucilagesecretory cells. Acts also as a beta-D-xylosidase during theremodeling of xylans in vascular development	Expressed in leaves, stems, seedlings, roots,inflorescences, siliques and developing seeds. Expressed in thevasculature of the roots, leaves, flowers and silique. Expressedin tissues undergoing secondary cell wall thickening such asprotoxylem, metaxylem, intrafascicular cambium and fibers.{ECO:0000269|PubMed:12609041, ECO:0000269|PubMed:15181203,ECO:0000269|PubMed:19458117}.	Secreted, extracellular space, extracellularmatrix {ECO:0000305}.	0.821222	0.55357	0.387229	1.39079	0.667007	0.42425	-0.822084	-0.647191	-0.959839	-1.81495
AT5G46420	Q9FHG3		At5g46420	Q9FHG3_ARATH		rRNA processing;UDP-N-acetylglucosamine biosynthetic process	ribosome binding;UDP-N-acetylglucosamine diphosphorylase activity	chloroplast;cytosol;ribosome	4	4	4	7.7	7.7	7.7	73.783	12.903	53294000	17	2.40572	0.0171183	0.942822	4.00378				1.37211	0.181999	0.397618	1.08071	0.841765	-0.446754	-0.0171571	-1.4139	-0.343289	-1.6531
AT5G42390	Q9FIH8;A0A1P8BEG1		At5g42390	A0A1P8BEG1_ARATH;SPP_ARATH	SPP	embryo development ending in seed dormancy	catalytic activity;metal ion binding;metallopeptidase activity	chloroplast;chloroplast stroma;mitochondrion	17	17	17	20.4	20.4	20.4	140.61	69.366	1057500000	155	1.86824	0.037174	0.444809	3.15265	Cleaves presequences (transit peptides) fromchloroplastic protein precursors (PubMed:12795700). Initiallyrecognizes a precursor by binding to the C-terminus of its transitpeptide and then removes the transit peptide in a singleendoproteolytic step. In a next step, pursues the cleavage oftransit peptide to a subfragment form (By similarity)		Plastid, chloroplast stroma{ECO:0000250|UniProtKB:Q40983}.	1.50033	0.210929	-0.423606	1.30691	0.936176	-0.137015	-0.938113	-0.576234	-0.252756	-1.62662
AT5G39730	Q9FIX1		At5g39730	AIGLB_ARATH	AIG2LB	response to salt stress	transferase activity, transferring acyl groups	cytosol;plasma membrane	4	4	4	40.1	40.1	40.1	20.017	11.945	185580000	30	2.5814	0.0129	-0.806824	-4.29829	Putative gamma-glutamylcyclotransferase	Expressed in flowerss, leaves, stems, seedsand roots. {ECO:0000305|PubMed:18214976}.	Cell membrane {ECO:0000269|PubMed:15060130}.	-0.411183	-1.19054	-0.483833	-0.598624	-1.27829	1.19836	1.74128	0.731658	0.411298	-0.120128
AT5G40760	Q9FJI5	Glucose-6-phosphate 1-dehydrogenase, cytoplasmic isoform 2	ACG12	G6PD6_ARATH	G6PD6	glucose metabolic process;pentose-phosphate shunt, oxidative branch	glucose-6-phosphate dehydrogenase activity;NADP binding	cytosol	9	6	6	21	15.9	15.9	59.116	38.615	147160000	34	2.03145	0.0288273	-1.42756	-3.40428	Catalyzes the rate-limiting step of the oxidativepentose-phosphate pathway, which represents a route for thedissimilation of carbohydrates besides glycolysis(PubMed:15634201). The main function of this enzyme is to providereducing power (NADPH) and pentose phosphates for fatty acid andnucleic acid synthesis which are involved in membrane synthesisand cell division (PubMed:15634201)	Expressed in roots, leaves, stems, buds,flowers and siliques. {ECO:0000269|PubMed:15634201}.	Cytoplasm, cytosol{ECO:0000269|PubMed:21309870}.	-1.51941	0.68682	-1.60297	-0.700858	-0.512035	0.36824	0.688903	0.754822	1.04169	0.7948
AT5G65220	Q9FJP3	50S ribosomal protein L29, chloroplastic	RPL29	RK29_ARATH	RPL29	translation	structural constituent of ribosome	chloroplast;chloroplast envelope;chloroplast stroma;nucleoid;ribosome	6	6	6	28.3	28.3	28.3	19.377	215.32	1492900000	116	2.64062	0.0117043	0.694198	4.39972			Plastid, chloroplast {ECO:0000250}.	0.363734	0.145884	0.95758	1.10854	1.41431	-1.0388	-1.32081	-1.11171	-0.762474	0.243752
AT5G66420	Q9FJZ7;Q94JM0;A0A1P8BA73		At5g66420	A0A1P8BA73_ARATH;Q94JM0_ARATH;Q9FJZ7_ARATH			catalytic activity		18	18	18	41.4	41.4	41.4	80.718	24.587	691520000	68	2.09084	0.0264042	-0.875526	-3.49718				-0.685115	-0.916794	0.100715	-1.44287	-0.744083	-0.322968	0.610372	1.70945	1.17359	0.517703
AT5G54160	Q9FK25	Flavone 3-O-methyltransferase 1	OMT1	OMT1_ARATH	OMT1	aromatic compound biosynthetic process;flavonol biosynthetic process;lignin biosynthetic process;melatonin biosynthetic process	acetylserotonin O-methyltransferase activity;caffeate O-methyltransferase activity;luteolin O-methyltransferase activity;myricetin 3'-O-methyltransferase activity;O-methyltransferase activity;protein dimerization activity;quercetin 3'-O-methyltransferase activity;quercetin 3-O-methyltransferase activity;S-adenosylmethionine-dependent methyltransferase activity	cytoplasm;cytosol;nucleus;plasma membrane;plasmodesma	12	12	12	51.2	51.2	51.2	39.618	110.27	1330700000	219	3.07634	0.00513514	0.664012	5.18385	Methylates OH residues of flavonoid compounds. Convertsquercetin into isorhamnetin. Dihydroquercetin is not a substrate.Catalyzes the methylation of monolignols, the lignin precursors.Does not contribute to the phenylpropanoid pattern of the pollentryphine, but is probably confined to isorhamnetin glycosidebiosynthesis (PubMed:10700397, PubMed:12777055, PubMed:20652169,PubMed:22258746). Involved …	Expressed in seedlings, leaves, stems, flowersand siliques, mostly in vascular tissues. Mostly expressed in theapical part of the stems and in roots. Expressed in theendothecium and the epidermal anther, but not in the tapetum. Alsodetected in all epidermal tissues of flower organs, includingpetals, sepals and the tip of the stigma.{ECO:0000269|PubMed:12777055, ECO:0000269|PubMed:22258746}.		1.7333	0.624985	0.142303	0.859741	0.803597	-0.409522	-0.720429	-0.633259	-0.860943	-1.53978
AT5G57655	Q9FKK7;F4KC24	Xylose isomerase	XYLA;At5g57655	F4KC24_ARATH;XYLA_ARATH	XYLA	D-xylose metabolic process	metal ion binding;xylose isomerase activity	endoplasmic reticulum;Golgi apparatus;vacuolar membrane;vacuole	19	19	19	51.4	51.4	51.4	53.719	57.414	2753700000	238	3.47265	0.00314286	0.598839	5.96368				1.39592	0.222112	0.517475	0.709627	1.44069	-0.533038	-0.827964	-1.30322	-1.10431	-0.517286
AT5G65750	Q9FLH2		At5g65750	Q9FLH2_ARATH	MPA24.10	response to cadmium ion;tricarboxylic acid cycle	cobalt ion binding;oxoglutarate dehydrogenase (succinyl-transferring) activity;thiamine pyrophosphate binding;zinc ion binding	mitochondrion;oxoglutarate dehydrogenase complex	28	17	17	38.9	27	27	116.4	97.299	1561300000	160	2.24185	0.0212121	-0.789088	-3.737				-1.28003	-0.347265	0.309307	-1.78738	-0.676853	0.197381	0.573068	0.743918	1.13063	1.13723
AT5G40950	Q9FLN4	50S ribosomal protein L27, chloroplastic	RPL27	RK27_ARATH	RPL27	response to cytokinin;translation	structural constituent of ribosome	chloroplast;chloroplast envelope;chloroplast stroma;ribosome;thylakoid	4	4	4	24.2	24.2	24.2	21.737	8.915	1032500000	36	4.44418	0.00166667	0.915054	8.2182			Plastid, chloroplast.	0.647242	0.878884	0.872467	1.24446	0.842154	-1.38498	-1.02872	-0.460939	-1.19494	-0.415633
AT5G52840	Q9FLX7;A0A1P8BD41	Probable NADH dehydrogenase [ubiquinone] 1 alpha subcomplex subunit 5, mitochondrial		A0A1P8BD41_ARATH;NDUA5_ARATH	MXC20.6	photorespiration;respiratory electron transport chain		chloroplast;membrane;mitochondrial membrane;mitochondrial respiratory chain complex I;mitochondrion;respiratory chain complex I	8	8	8	65.7	65.7	65.7	19.179	97.379	910290000	99	1.83248	0.0390201	-0.550713	-3.09815	Accessory subunit of the mitochondrial membranerespiratory chain NADH dehydrogenase (Complex I), that is believednot to be involved in catalysis. Complex I functions in thetransfer of electrons from NADH to the respiratory chain. Theimmediate electron acceptor for the enzyme is believed to beubiquinone (By similarity).		Matrix side {ECO:0000250}.; Peripheral membrane protein{ECO:0000250};Mitochondrion inner membrane {ECO:0000250,ECO:0000305|PubMed:25732537}	-1.66783	-0.723358	0.0124031	-0.383776	-0.740567	0.828133	2.01707	0.467824	0.0321213	0.157972
AT5G55730	Q9FM65	Fasciclin-like arabinogalactan protein 1	FLA1	FLA1_ARATH	FLA1	root development;shoot system development		anchored component of membrane;anchored component of plasma membrane;apoplast;cell wall;plasma membrane	7	7	7	27.6	27.6	27.6	44.849	229.97	1677400000	144	1.90431	0.0356017	-0.436575	-3.20782	May be a cell surface adhesion protein.	Preferentially expressed in flowers.{ECO:0000269|PubMed:14645732}.	Lipid-anchor, GPI-anchor.;Secreted, extracellular space, apoplast{ECO:0000269|PubMed:15593128}. Cell membrane	-1.14427	-0.110629	-0.494878	-1.333	-0.475118	-0.0822144	-0.128411	0.646261	1.3206	1.80166
AT5G16620	Q9FMD5	Protein TIC 40, chloroplastic	TIC40	TIC40_ARATH	TIC40	chloroplast organization;protein import into chloroplast stroma		chloroplast;chloroplast envelope;chloroplast inner membrane;chloroplast thylakoid membrane;integral component of membrane;membrane;Tic complex	11	11	11	33.1	33.1	33.1	48.903	323.31	905660000	151	1.80324	0.0410078	0.306276	3.05376	Involved in protein precursor import into chloroplasts.Part of the motor complex consisting of a co-chaperone (TIC40) anda chaperone (HSP93) associated with the import channel (TIC110).Causes the release of bound transit peptides from TIC110 andstimulates ATP hydrolysis by HSP93. Involved in reinsertion ofproteins from the chloroplast stroma into the inner membrane	Expressed in seedlings, flowers, leaves, stemsand roots. {ECO:0000269|PubMed:15033972,ECO:0000269|PubMed:15659100}.	Single-pass membrane protein {ECO:0000269|PubMed:12805212,ECO:0000269|PubMed:17060496, ECO:0000269|PubMed:17535810,ECO:0000269|PubMed:17883373}.;Plastid, chloroplast inner membrane{ECO:0000269|PubMed:12805212, ECO:0000269|PubMed:17060496,ECO:0000269|PubMed:17535810, ECO:0000269|PubMed:17883373}	0.515714	0.866317	-0.295411	0.867305	1.52611	-1.54383	-1.19442	-0.470895	0.475517	-0.746408
AT5G23140	Q9FN42	ATP-dependent Clp protease proteolytic subunit 2, mitochondrial	CLPP2	CLPP2_ARATH	CLPP2	protein quality control for misfolded or incompletely synthesized proteins	ATPase binding;ATP-dependent peptidase activity;cobalt ion binding;identical protein binding;serine-type endopeptidase activity;zinc ion binding	chloroplast thylakoid membrane;chloroplastic endopeptidase Clp complex;endopeptidase Clp complex;mitochondrion;plastid stroma	6	6	6	36.9	36.9	36.9	26.283	33.609	552960000	74	2.02646	0.0288964	0.486562	3.39652	Component of the mitochondrial ATP-dependent Clpprotease (PubMed:11352464). Cleaves peptides in various proteinsin a process that requires ATP hydrolysis (By similarity). Has achymotrypsin-like activity. Plays a major role in the degradationof misfolded proteins (By similarity)	Constitutively expressed in leaves, shoots,roots and flowers. {ECO:0000269|PubMed:11352464}.	Mitochondrion {ECO:0000269|PubMed:11352464,ECO:0000269|PubMed:14593120, ECO:0000305|PubMed:25732537}.	0.259352	0.644257	2.02588	0.0875319	0.628031	-0.977959	-1.12158	-0.943741	-0.903109	0.301338
AT5G23060	Q9FN48;A0A1P8BCX7	Calcium sensing receptor, chloroplastic	CAS	A0A1P8BCX7_ARATH;CAS_ARATH	CaS;CAS	cellular response to calcium ion;de-etiolation;regulation of stomatal closure		chloroplast;chloroplast thylakoid;chloroplast thylakoid membrane;integral component of membrane;mitochondrion;thylakoid	22	22	22	51.7	51.7	51.7	41.285	323.31	24969000000	370	3.28175	0.00345763	-0.340562	-5.57935	Modulates cytoplasmic Ca(2+) concentration and iscrucial for proper stomatal regulation in response to elevatedlevels of external Ca(2+). May function by regulatingconcentrations of inositol 1,4,5-trisphosphate (IP3), which inturn triggers release of Ca(2+) from internal stores. May play arole in de-etiolation.	Predominantly expressed in the shoot,including guard cells. {ECO:0000269|PubMed:12968184}.	Stromal side{ECO:0000269|PubMed:18331354, ECO:0000269|PubMed:18507772}.;Plastid, chloroplast thylakoid membrane{ECO:0000269|PubMed:18331354, ECO:0000269|PubMed:18507772};Single-pass membrane protein {ECO:0000269|PubMed:18331354,ECO:0000269|PubMed:18507772}	-1.49636	-0.389205	-0.595343	-0.839412	-0.910497	0.720939	0.601686	0.945653	1.69525	0.267291
AT5G13630	Q9FNB0;A8MR05	Magnesium-chelatase subunit ChlH, chloroplastic	CHLH;GUN5	A8MR05_ARATH;CHLH_ARATH	CHLH;GUN5	chlorophyll biosynthetic process;photosynthesis	ATP binding;magnesium chelatase activity	chloroplast;chloroplast inner membrane;chloroplast stroma;magnesium chelatase complex;mitochondrion	37	37	37	39.3	39.3	39.3	153.57	146.07	2068300000	258	2.73603	0.00967925	1.23346	4.56558	Multifunctional protein involved in chlorophyllsynthesis, plastid-to-nucleus retrograde signaling and abscisicacid (ABA) perception. In chlorophyll synthesis, catalyzes theinsertion of magnesium ion into protoporphyrin IX to yield Mg-protoporphyrin IX. The reaction takes place in two steps, with anATP-dependent activation followed by an ATP-dependent chelationstep. In addition to its function in …	Widely expressed.{ECO:0000269|PubMed:17051210}.	Peripheral membrane protein; Stromal side.Plastid, chloroplast membrane;Cytoplasmic side. Note=Predominantly associated with thechloroplast envelope. Spans the chloroplast envelope and is itsN- and C-termini are exposed to the cytosol (PubMed:20543028).{ECO:0000269|PubMed:20543028}.;Plastid, chloroplast stroma. Plastid,chloroplast membrane	1.11822	0.403643	0.38342	1.2166	0.910448	-0.275188	-0.482373	-0.310385	-1.07469	-1.88969
AT5G08650	Q9FNM5;A0A1P8B9J8	Translation factor GUF1 homolog, chloroplastic		A0A1P8B9J8_ARATH;GUFP_ARATH		positive regulation of translation;translation	GTP binding;GTPase activity;protein domain specific binding;ribosome binding	chloroplast;mitochondrial inner membrane;mitochondrial matrix	9	9	9	18.5	18.5	18.5	75.436	102.86	276590000	64	3.36502	0.00301818	1.08729	5.74492	Promotes chloroplast protein synthesis. May act as afidelity factor of the translation reaction, by catalyzing a one-codon backward translocation of tRNAs on improperly translocatedribosomes.;Promotes mitochondrial protein synthesis. May act as afidelity factor of the translation reaction, by catalyzing a one-codon backward translocation of tRNAs on improperly translocatedribosomes. Binds to mito…		Matrix side {ECO:0000256|HAMAP-Rule:MF_03137}.; Peripheral membrane protein{ECO:0000256|HAMAP-Rule:MF_03137};Mitochondrion inner membrane{ECO:0000256|HAMAP-Rule:MF_03137};Plastid, chloroplast{ECO:0000269|PubMed:18431481}.	1.07823	0.941511	0.262426	0.841229	1.13222	-0.0337972	-0.737838	-0.920735	-0.9544	-1.60884
AT5G08530	Q9FNN5	NADH dehydrogenase [ubiquinone] flavoprotein 1, mitochondrial		NDUV1_ARATH		cellular respiration;mitochondrial electron transport, NADH to ubiquinone	4 iron, 4 sulfur cluster binding;FMN binding;metal ion binding;NAD binding;NADH dehydrogenase (ubiquinone) activity	mitochondrial respiratory chain complex I;mitochondrion	19	19	19	52.9	52.9	52.9	53.449	82.55	2470200000	276	3.16628	0.00467153	-0.503602	-5.35482	Core subunit of the mitochondrial membrane respiratorychain NADH dehydrogenase (Complex I) that is believed to belong tothe minimal assembly required for catalysis. Complex I functionsin the transfer of electrons from NADH to the respiratory chain.The immediate electron acceptor for the enzyme is believed to beubiquinone (By similarity).		Matrix side {ECO:0000250}.; Peripheral membrane protein{ECO:0000250};Mitochondrion inner membrane {ECO:0000250,ECO:0000305|PubMed:25732537}	-0.575639	-0.50918	-0.0210908	-1.47068	-1.61768	0.674107	0.757461	1.08323	0.932665	0.746805
AT3G14990	Q9FPF0;Q9FPF0-2	Protein DJ-1 homolog A	DJ1A	DJ1A_ARATH	DJ1A	guanine deglycation, glyoxal removal;positive regulation of cellular response to oxidative stress;protein deglycation, glyoxal removal;response to cadmium ion	glyoxalase III activity;protein deglycase activity	cytosol;nucleus;plasma membrane;plasmodesma;vacuolar membrane;vacuole	25	25	25	64.8	64.8	64.8	41.857	321.76	4984100000	344	3.33062	0.00325664	0.640356	5.67614	Involved in oxidative stress response. Confersprotection against diverse stresses by binding both CSD1 and GPX2and mediating the cytosolic activation of the Cu-Zn-dependentsuperoxide dismutase activity of CSD1		Cytoplasm, cytosol{ECO:0000269|PubMed:20406884}. Nucleus{ECO:0000269|PubMed:20406884}.	0.915579	1.68566	1.19352	0.214369	0.236398	-0.886659	-0.564403	-1.10624	-0.986286	-0.701937
AT1G75270	Q9FRL8	Glutathione S-transferase DHAR2	DHAR2	DHAR2_ARATH	DHAR2	positive regulation of salicylic acid mediated signaling pathway;protein glutathionylation	glutathione binding;glutathione dehydrogenase (ascorbate) activity;glutathione transferase activity	cytosol;plasma membrane	7	7	7	41.8	41.8	41.8	23.407	59.342	695190000	106	4.01807	0.00195745	0.689622	7.16232	Displays a dual function. As a soluble protein, exhibitsglutathione-dependent thiol transferase and dehydroascorbate (DHA)reductase activities (PubMed:12077129). Exhibits glutathione-dependent thiol transferase and dehydroascorbate (DHA) reductaseactivities. Key component of the ascorbate recycling system.Involved in the redox homeostasis, especially in scavenging of ROSunder oxidative stresses. …		Cytoplasm, cytosol {ECO:0000305}.	0.754265	0.982262	0.983214	0.382398	1.30972	-1.12265	-0.359642	-0.919716	-1.44231	-0.567539
AT1G27130	Q9FUS6;Q9FUT1	Glutathione S-transferase U13	GSTU13	GSTUD_ARATH	GSTU13	glutathione metabolic process;response to cadmium ion;toxin catabolic process	glutathione transferase activity	cytoplasm;cytosol	10	10	10	42.7	42.7	42.7	25.131	93.196	2073700000	176	3.52423	0.00283333	-0.66737	-6.07046	In vitro, possesses glutathione S-transferase activitytoward 1-chloro-2,4-dinitrobenzene (CDNB) and benzylisothiocyanate (BITC). May be involved in the conjugation ofreduced glutathione to a wide number of exogenous and endogenoushydrophobic electrophiles and have a detoxification role againstcertain herbicides.		Cytoplasm, cytosol {ECO:0000305}.	-0.762598	-0.381905	-1.1175	-1.02924	-1.00836	0.143293	0.982502	1.02174	1.62473	0.527347
AT1G10370	Q9FUS8	Glutathione S-transferase U17	GSTU17	GSTUH_ARATH	GSTU17	de-etiolation;glutathione metabolic process;lateral root development;negative regulation of response to water deprivation;regulation of growth;response to growth hormone;response to karrikin;response to salt stress;toxin catabolic process	glutathione transferase activity	chloroplast;cytoplasm;cytosol	6	6	6	39.6	39.6	39.6	25.307	17.251	506010000	57	2.46611	0.0153382	0.46966	4.10398	Involved in light signaling, mainly phyA-mediatedphotomorphogenesis and in the integration of various phytohormonesignals to modulate various aspects of plant development byaffecting glutathione pools. In vitro, possesses glutathione S-transferase activity toward 1-chloro-2,4-dinitrobenzene (CDNB) andbenzyl isothiocyanate (BITC).		Cytoplasm, cytosol {ECO:0000305}.	1.96066	0.021998	0.61884	0.633046	0.671145	-1.00593	-1.1141	-0.0586608	-0.569071	-1.15792
AT1G13270	Q9FV52;F4HQQ8	Methionine aminopeptidase 1B, chloroplastic	MAP1B;MAP1C	F4HQQ8_ARATH;MAP1B_ARATH	MAP1B;MAP1C	N-terminal protein amino acid modification;protein initiator methionine removal	aminopeptidase activity;metal ion binding;metalloaminopeptidase activity	chloroplast;mitochondrion	8	8	8	39.6	39.6	39.6	40.424	20.307	1203900000	96	3.21721	0.004	0.796961	5.45315	Removes the N-terminal methionine from nascent proteins.The N-terminal methionine is often cleaved when the second residuein the primary sequence is small and uncharged (Met-Ala-, Cys,Gly, Pro, Ser, Thr, or Val).	Ubiquitous. Preferentially expressed in greentissues. {ECO:0000269|PubMed:11060042}.	Plastid, chloroplast {ECO:0000255|HAMAP-Rule:MF_03174, ECO:0000269|PubMed:11060042}.	1.5081	0.339501	0.326916	0.751259	1.28494	-1.06965	-0.628696	-0.551451	-1.49131	-0.46961
AT1G48520	Q9FV81;F4HYH1;Q9FV81-2	Glutamyl-tRNA(Gln) amidotransferase subunit B, chloroplastic/mitochondrial	GATB	F4HYH1_ARATH;GATB_ARATH	GATB	glutaminyl-tRNAGln biosynthesis via transamidation;mitochondrial translation	ATP binding;glutaminyl-tRNA synthase (glutamine-hydrolyzing) activity	chloroplast;chloroplast stroma;glutamyl-tRNA(Gln) amidotransferase complex;mitochondrion	18	18	18	43.5	43.5	43.5	60.94	72.869	1240900000	213	2.22717	0.0216597	0.335765	3.71345	Allows the formation of correctly charged Gln-tRNA(Gln)through the transamidation of misacylated Glu-tRNA(Gln) inchloroplasts and mitochondria. The reaction takes place in thepresence of glutamine and ATP through an activated gamma-phospho-Glu-tRNA(Gln).		Mitochondrion {ECO:0000255|HAMAP-Rule:MF_03147, ECO:0000269|PubMed:18441100}. Plastid, chloroplast{ECO:0000255|HAMAP-Rule:MF_03147, ECO:0000269|PubMed:18441100}.;Mitochondrion {ECO:0000256|HAMAP-Rule:MF_03147}. Plastid, chloroplast {ECO:0000256|HAMAP-Rule:MF_03147}.	1.20069	0.234059	0.323437	0.747392	1.26791	-1.25611	0.0157578	0.157654	-1.27588	-1.41491
AT1G48860	Q9FVP6;F4I035	3-phosphoshikimate 1-carboxyvinyltransferase	F27K7.11;At1g48860	F4I035_ARATH;Q9FVP6_ARATH	F27K7.11	aromatic amino acid family biosynthetic process;chorismate biosynthetic process	3-phosphoshikimate 1-carboxyvinyltransferase activity	chloroplast	16	16	5	40.1	40.1	14.6	55.831	121.84	1510600000	196	1.95555	0.0330299	0.514236	3.28662				1.50857	-0.449103	0.726891	1.13377	0.675214	-0.264637	-0.217339	-0.27035	-1.52416	-1.31885
AT1G48920	Q9FVQ1	Nucleolin 1	NUCL1	NUCL1_ARATH	NUCL1	cotyledon vascular tissue pattern formation;endonucleolytic cleavage involved in rRNA processing;leaf development;leaf vascular tissue pattern formation;petal vascular tissue pattern formation;ribosomal small subunit biogenesis;ribosome biogenesis;root development;rRNA processing;sepal vascular tissue pattern formation;shoot system development	DNA binding;mRNA binding;rRNA binding	90S preribosome;mitochondrion;nucleolus	15	15	15	27.6	27.6	27.6	58.773	72.665	1480600000	178	1.77624	0.0428987	0.364183	3.01287	Involved in pre-rRNA processing and ribosome assembly(PubMed:17108323, PubMed:17286797, PubMed:17369435,PubMed:21124873). Is associated with intranucleolar chromatin andpre-ribosomal particles and plays a role in controlling activationand repression of a specific subset of rRNA genes located indistinctive nucleolar organizer regions. Binds specifically rDNAchromatin and may be required to maintai…	Expressed in roots, leaves, shoots andflowers. {ECO:0000269|PubMed:17108323,ECO:0000269|PubMed:17286797, ECO:0000269|PubMed:17369435}.	Nucleus, nucleolus{ECO:0000269|PubMed:17108323, ECO:0000269|PubMed:17286797,ECO:0000269|PubMed:17369435}. Note=Found in the dense fibrillarcomponent region of the nucleolus. {ECO:0000269|PubMed:17108323}.	0.493992	0.53234	0.402388	0.957824	1.07174	-0.49373	0.143044	-0.540699	-0.189482	-2.37742
AT1G57770	Q9FVR9		F12K22.18	Q9FVR9_ARATH			oxidoreductase activity	chloroplast	11	11	11	29.3	29.3	29.3	61.723	120.66	897480000	175	2.38162	0.0176479	0.487607	3.96409				-0.304807	1.00896	1.08152	0.928454	1.14716	-0.731743	-1.24614	-0.871183	0.262597	-1.27482
AT3G02360	Q9FWA3	6-phosphogluconate dehydrogenase, decarboxylating 3		6PGD2_ARATH	PGD2	D-gluconate metabolic process;male-female gamete recognition during double fertilization forming a zygote and endosperm;pentose-phosphate shunt;response to salt stress	NADP binding;phosphogluconate dehydrogenase (decarboxylating) activity	chloroplast stroma;cytosol;P4 peroxisome;peroxisome	19	17	17	46.3	42.2	42.2	53.577	204.53	3800200000	288	2.1089	0.0250449	-0.156221	-3.52558	Catalyzes the oxidative decarboxylation of 6-phosphogluconate to ribulose 5-phosphate and CO(2), withconcomitant reduction of NADP to NADPH (PubMed:26941195). Requiredfor guided growth of the male gametophytes and interaction betweenthe pollen tube and the ovule (PubMed:26941195)		Cytoplasm, cytosol{ECO:0000269|PubMed:26941195}. Peroxisome{ECO:0000269|PubMed:26941195}.	-1.13663	-0.171617	-0.976426	-1.06394	-0.351299	2.09681	0.667595	0.266998	-0.0736814	0.742186
AT1G19570	Q9FWR4;Q9FWR4-2;Q9LN39	Glutathione S-transferase DHAR1, mitochondrial	DHAR1	DHAR1_ARATH	DHAR1	cellular response to hydrogen peroxide;defense response;positive regulation of salicylic acid mediated signaling pathway;protein glutathionylation;regulation of ion transmembrane transport;regulation of symbiosis, encompassing mutualism through parasitism;response to jasmonic acid;response to ozone;response to symbiotic fungus;response to zinc ion	copper ion binding;glutathione dehydrogenase (ascorbate) activity;glutathione transferase activity;voltage-gated ion channel activity	apoplast;chloroplast;chloroplast stroma;cytosol;mitochondrion;peroxisome;plasma membrane;vacuole	17	17	17	92.5	92.5	92.5	23.641	323.31	13216000000	351	3.39638	0.00318447	-0.923705	-5.80811	Displays a dual function. As a soluble protein, exhibitsglutathione-dependent thiol transferase and dehydroascorbate (DHA)reductase activities (PubMed:12077129). Key component of theascorbate recycling system. Involved in the redox homeostasis,especially in scavenging of ROS under oxidative stresses,subsequently to biotic or abiotic inducers (PubMed:16262714). As aperipheral membrane protein, cou…	Expressed at least in roots and leaves.{ECO:0000269|PubMed:12954611}.	Peripheralmembrane protein {ECO:0000305}. Note=Exists both as solubleprotein and as membrane protein.;Mitochondrion {ECO:0000269|PubMed:12954611}.Cytoplasm, cytosol {ECO:0000305}. Peroxisome{ECO:0000269|PubMed:19329564}. Membrane {ECO:0000305}	-1.61539	-0.829891	0.00888064	-0.7277	-1.10052	0.600691	1.28123	0.609972	0.973831	0.798899
AT1G75350	Q9FWS4	50S ribosomal protein L31, chloroplastic	RPL31	RK31_ARATH	RPL31	translation	rRNA binding;structural constituent of ribosome	chloroplast;chloroplast envelope;chloroplast stroma;ribosome	5	5	5	44.4	44.4	44.4	16.033	40.81	641210000	99	1.75856	0.0441733	0.622748	2.98616	Binds the 23S rRNA.		Plastid, chloroplast.	0.731632	-0.35533	0.179498	1.51468	1.37334	-0.447424	-1.26142	-1.24872	0.330031	-0.816281
AT1G49750	Q9FXA1		F14J22.4	Q9FXA1_ARATH				chloroplast	16	16	16	45.3	45.3	45.3	54.407	197.22	1993600000	204	1.85875	0.0376529	-0.528123	-3.13816				-1.67213	-0.527589	0.301984	-0.588217	-1.03752	0.980183	1.37516	0.797133	-0.468692	0.839681
AT1G49760	Q9FXA2	Polyadenylate-binding protein 8	PAB8	PABP8_ARATH	PAB8	regulation of translation;response to cadmium ion;viral process	mRNA 3'-UTR binding;mRNA binding;poly(A) binding;poly(U) RNA binding;RNA binding	cytoplasm;cytosol;nucleus;ribonucleoprotein complex	21	21	19	48.1	48.1	43.5	72.779	88	2777000000	325	4.41936	0.00224	0.372012	8.1535	Binds the poly(A) tail of mRNA. Appears to be animportant mediator of the multiple roles of the poly(A) tail inmRNA biogenesis, stability and translation (By similarity). Duringinfection with potyvirus TuMV, acts as a potential integralcomponent of the viral replicase complex that could play animportant role in the regulation of potyviral RNA-dependent RNApolymerase (RdRp) (By similarity).	Expressed predominantly in immature flowers.	Cytoplasm {ECO:0000250}. Nucleus{ECO:0000250}.	0.816218	0.552959	0.736415	1.56259	0.81325	-0.903295	-0.387005	-0.950324	-1.08029	-1.16052
AT5G13510	Q9FY50	50S ribosomal protein L10, chloroplastic	RPL10	RK10_ARATH	RPL10	ribosome biogenesis;translation	rRNA binding;structural constituent of ribosome	chloroplast;chloroplast envelope;chloroplast stroma;cytosolic ribosome;large ribosomal subunit	10	10	10	59.5	59.5	59.5	24.736	109.7	3213600000	194	3.93724	0.00212245	0.597843	6.97449	This protein binds directly to 23S ribosomal RNA		Plastid, chloroplast {ECO:0000250}.	1.19478	0.313955	1.03955	1.18022	0.667197	-0.721599	-0.412819	-0.868284	-1.54786	-0.845139
AT1G67360	Q9FYF7	REF/SRPP-like protein At1g67360		Y1736_ARATH		developmental vegetative growth;lipid droplet organization;pollen development;positive regulation of growth;positive regulation of response to water deprivation		endoplasmic reticulum;lipid droplet;vacuole	7	7	7	41.7	41.7	41.7	26.425	20.367	651700000	48	1.95411	0.0331193	-2.42613	-3.2844				-1.91643	-0.0486626	-0.849258	-1.1776	0.397635	0.908825	0.424557	0.272179	0.972096	1.01665
AT5G52520	Q9FYR6		OVA6	SYPM_ARATH	OVA6	embryo sac development;plant ovule development;prolyl-tRNA aminoacylation;regulation of photosynthesis;seed development	ATP binding;proline-tRNA ligase activity	aminoacyl-tRNA synthetase multienzyme complex;chloroplast;chloroplast stroma;cytoplasm;mitochondrion	21	21	21	42.4	42.4	42.4	60.746	266.96	3207100000	338	2.86803	0.00778495	0.394343	4.80025	Catalyzes the attachment of proline to tRNA(Pro) in atwo-step reaction: proline is first activated by ATP to form Pro-AMP and then transferred to the acceptor end of tRNA(Pro)		Plastid, chloroplast{ECO:0000269|PubMed:16251277}. Mitochondrion{ECO:0000269|PubMed:16251277}.	1.83246	0.693162	0.0258872	0.688323	0.846907	-0.787692	-0.810772	-0.207636	-0.984916	-1.29573
AT1G16880	Q9FZ47;F4I613	ACT domain-containing protein ACR11	ACR11;At1g16880	ACR11_ARATH;F4I613_ARATH	ACR11	response to cold;response to cytokinin;response to light stimulus;response to sucrose	nucleotidyltransferase activity	chloroplast;chloroplast envelope;chloroplast stroma;chloroplast thylakoid membrane;stromule	11	11	11	40.7	40.7	40.7	31.294	28.859	7764300000	162	2.1524	0.0233134	0.384757	3.59429	May be involved in feedback regulation of amino acidmetabolism. May be involved in the regulation of glutaminemetabolism.	Expressed in cotyledons, rosette leaves,stems, sepals, style, and tip of pedicel in mature siliques.{ECO:0000269|PubMed:21861936}.	Plastid, chloroplast{ECO:0000269|PubMed:21861936}.	0.488745	0.658279	0.74326	1.88375	-0.0463919	-0.141544	-0.499504	-0.703254	-0.634711	-1.74863
AT1G12520	Q9LD47;Q9LD47-2;Q9LD47-3	Copper chaperone for superoxide dismutase, chloroplastic/cytosolic	CCS	CCS_ARATH	CCS	cellular copper ion homeostasis;metal ion transport;removal of superoxide radicals	copper ion binding;superoxide dismutase activity;superoxide dismutase copper chaperone activity;zinc ion binding	chloroplast;chloroplast stroma;cytoplasm;cytosol;extracellular space	4	4	4	16.2	16.2	16.2	33.851	9.2216	129680000	34	2.32956	0.0189764	1.35526	3.8789	Copper chaperone for the superoxide dismutases CSD1,CSD2 and CSD3. Binds copper ions and delivers them specifically toCSDs. Is required for assistance in CSDs disulfide bond formationand thereby activation of CSDs. May be involved in the negativeregulation of heat stress-responsive genes and thermotolerance	Expressed in roots, shoots, stems and flowers,and at lower levels in rosette and cauline leaves.{ECO:0000269|PubMed:16126858}.	Plastid, chloroplast{ECO:0000269|PubMed:15848163}. Cytoplasm, cytosol{ECO:0000269|PubMed:15848163}. Note=It is unclear whether thechloroplastic and cytosolic proteins result from 2 differenttranscripts or from alternative translation initiation from thesame transcript. {ECO:0000269|PubMed:16126858}.	0.990098	0.503634	-0.108375	0.618811	1.82852	0.0565021	-1.06516	-0.597198	-1.27791	-0.948925
AT4G11420	Q9LD55	Eukaryotic translation initiation factor 3 subunit A	TIF3A1	EIF3A_ARATH	TIF3A1	formation of cytoplasmic translation initiation complex;translation reinitiation;translational initiation	mRNA binding;translation initiation factor activity	cytosol;eukaryotic 43S preinitiation complex;eukaryotic 48S preinitiation complex;eukaryotic translation initiation factor 3 complex;eukaryotic translation initiation factor 3 complex, eIF3e;eukaryotic translation initiation factor 3 complex, eIF3m;multi-eIF complex;plasma membrane	29	29	29	38	38	38	114.3	165.97	3260800000	318	1.79216	0.0416448	0.195778	3.03697	RNA-binding component of the eukaryotic translationinitiation factor 3 (eIF-3) complex, which is involved in proteinsynthesis of a specialized repertoire of mRNAs and, together withother initiation factors, stimulates binding of mRNA andmethionyl-tRNAi to the 40S ribosome. The eIF-3 complexspecifically targets and initiates translation of a subset ofmRNAs involved in cell proliferation.		Cytoplasm {ECO:0000255|HAMAP-Rule:MF_03000}.	0.814636	0.89707	0.105862	2.03967	-0.386074	-0.77553	-0.784065	0.0622107	-0.839999	-1.13378
AT5G10920	Q9LEU8	Argininosuccinate lyase, chloroplastic		ARLY_ARATH		arginine biosynthetic process via ornithine	argininosuccinate lyase activity	chloroplast;chloroplast stroma;cytoplasm	15	15	15	44.5	44.5	44.5	57.512	216.95	1251100000	164	1.99323	0.030359	-0.411063	-3.34488			Plastid, chloroplast {ECO:0000305}.	0.00914138	-0.437897	-0.65577	-1.65533	-0.882194	0.944133	0.198523	-0.20982	0.97788	1.71133
AT3G53580	Q9LFG2	Diaminopimelate epimerase, chloroplastic	DAPF	DAPF_ARATH	DAPF	lysine biosynthetic process via diaminopimelate	diaminopimelate epimerase activity	chloroplast;chloroplast stroma;cytosol	11	11	11	27.3	27.3	27.3	38.984	31.419	1180000000	136	1.71034	0.0473562	0.533885	2.91354	Racemase that operates by a 'two-base' mechanism, whichinvolves one active-site cysteine acting as a base to abstract thealpha-proton of an amino acid, while a second cysteine thiolfunctions as an acid to reprotonate the resulting planarcarbanionic intermediate from the opposite face		Plastid, chloroplast {ECO:0000305}.	0.357355	1.05226	0.394022	0.988583	0.611228	0.122894	0.277456	-0.640284	-0.968181	-2.19533
AT5G15650	Q9LFW1;O22666;Q9LUE6	UDP-arabinopyranose mutase 2	RGP2	RGP2_ARATH	RGP2	arabinose biosynthetic process;cell wall organization;plant-type cell wall biogenesis;plant-type cell wall organization or biogenesis;pollen development;response to cadmium ion;response to salt stress;UDP-L-arabinose metabolic process	intramolecular transferase activity;structural constituent of ribosome;UDP-arabinopyranose mutase activity	cell wall;cytosol;cytosolic ribosome;Golgi apparatus;membrane;polysomal ribosome	21	21	9	70	70	30.3	40.89	191.36	5910000000	312	2.32286	0.0191438	-0.371339	-3.86799	UDP-L-arabinose mutase involved in the biosynthesis ofcell wall non-cellulosic polysaccharides. Catalyzes theinterconvertion of UDP-L-arabinopyranose (UDP-Arap) and UDP-L-arabinofuranose (UDP-Araf) in vitro. Preferentially catalyzes theformation of UDP-Arap from UDP-Araf. At thermodynamic equilibriumin vitro the ratio of the pyranose form over the furanose form is95:5. Is not active on other UDP-…	Predominantly expressed in shoot and rootapical meristems. Expressed in epidermal cells of leaves,inflorescence stems and seed coat. Expressed in pollen.{ECO:0000269|PubMed:17071651, ECO:0000269|PubMed:21478444}.	Cytoplasm, cytosol. Golgi apparatus.Note=Soluble and membrane-associated.{ECO:0000269|PubMed:17071651, ECO:0000269|PubMed:21478444}.	-0.598476	-0.122944	-1.09184	-1.04673	-0.968939	1.16572	1.12913	1.47538	-0.512775	0.571482
AT3G28220	Q9LHA6		At3g28220	Q9LHA6_ARATH				chloroplast envelope;integral component of membrane;vacuole	4	4	4	13	13	13	42.886	26.119	587980000	40	2.16838	0.0229806	-1.5972	-3.61964				-0.62284	0.302471	-0.340881	-1.10293	-1.97346	0.511741	1.3489	0.783698	0.555402	0.537896
AT3G12580	Q9LHA8	Probable mediator of RNA polymerase II transcription subunit 37c	MED37C	MD37C_ARATH	MED37C	cellular response to heat;cellular response to unfolded protein;chaperone cofactor-dependent protein refolding;protein refolding;protein ubiquitination;response to bacterium;response to cadmium ion;response to heat;response to high light intensity;response to hydrogen peroxide;response to temperature stimulus;response to unfolded protein;response to virus	ATP binding;ATPase activity;ATPase activity, coupled;heat shock protein binding;misfolded protein binding;protein binding involved in protein folding;ubiquitin protein ligase binding;unfolded protein binding	apoplast;cell wall;cytoplasm;cytosol;Golgi apparatus;mitochondrion;nucleus;plasma membrane;vacuolar membrane	24	6	6	37.2	11.2	11.2	71.101	8.8039	160640000	29	1.71528	0.0469581	1.37656	2.92096	Component of the Mediator complex, a coactivatorinvolved in the regulated transcription of nearly all RNApolymerase II-dependent genes. Mediator functions as a bridge toconvey information from gene-specific regulatory proteins to thebasal RNA polymerase II transcription machinery. The Mediatorcomplex, having a compact conformation in its free form, isrecruited to promoters by direct interactions …		Cytoplasm {ECO:0000305}. Nucleus{ECO:0000305}.	0.641655	0.649138	0.899795	0.416707	0.800346	-0.485489	-2.37168	-0.0700827	-0.770381	0.289994
AT3G22890	Q9LIK9	ATP sulfurylase 1, chloroplastic	APS1	APS1_ARATH	APS1	hydrogen sulfide biosynthetic process;response to cadmium ion;response to cytokinin;selenium compound metabolic process;sulfate assimilation	adenylylsulfate kinase activity;ATP binding;sulfate adenylyltransferase (ATP) activity	chloroplast;chloroplast stroma;plasma membrane	20	20	13	59.2	59.2	42.5	51.458	167.42	3981800000	302	4.13964	0.00247059	0.739755	7.45204	Mediates selenate (Se) reduction, and promotes Se andsulfur (S) uptake and assimilation.		Plastid, chloroplast stroma{ECO:0000269|PubMed:18431481, ECO:0000269|PubMed:8058839}.	0.872221	0.590503	0.595767	1.03434	1.3419	-0.796335	-0.815728	-0.382857	-0.871641	-1.56817
AT3G26450	Q9LIN0		At3g26450	Q9LIN0_ARATH		defense response;response to cytokinin			14	12	9	96.7	92.1	73	17.791	218.64	2252900000	154	5.05944	0	-0.690676	-9.96382				-1.38542	-1.03638	-0.637292	-0.75515	-0.74888	0.890887	1.03027	0.526561	1.28067	0.834735
AT3G14210	Q9LJG3;A0A1I9LQL1	GDSL esterase/lipase ESM1	ESM1	A0A1I9LQL1_ARATH;ESM1_ARATH	ESM1	defense response to bacterium;glucosinolate catabolic process;lipid catabolic process;response to cold;response to insect	hydrolase activity, acting on ester bonds	apoplast;chloroplast;chloroplast envelope;cytosolic ribosome;membrane;nucleus;peroxisome;plasmodesma;vacuole	22	22	22	61.2	61.2	61.2	44.06	323.31	106860000000	909	4.78224	0	-1.02431	-9.14228	Represses or inhibits nitriles production frommethionine-derived and from indol-3-ylmethyl glucosinolates.Favors isothiocyanate production.		Secreted {ECO:0000305}.	-0.516666	-0.623431	-0.811207	-1.38959	-1.19062	1.08749	1.09148	1.03947	0.553373	0.75968
AT5G65940	Q9LKJ1-2;Q9LKJ1;Q9LKJ1-4;Q9LKJ1-3;A0A1P8AX47;A0A1P8B0L8;Q6NMB0	3-hydroxyisobutyryl-CoA hydrolase 1	CHY1	HIBC1_ARATH	CHY1	fatty acid beta-oxidation;response to cold;valine catabolic process	3-hydroxyisobutyryl-CoA hydrolase activity	peroxisome	7	7	5	36.8	36.8	24	37.502	12.866	312390000	39	2.20296	0.0224257	0.479465	3.67472	Involved in valine catabolism. May be indirectlyinvolved in benzoic acid biosynthesis and in cold signaling andcold tolerance.	Expressed in roots, leaves, flowers andsiliques. {ECO:0000269|PubMed:15280033}.	Peroxisome {ECO:0000305}.	0.23174	1.4741	-0.387291	0.709332	1.73101	-0.996244	-0.381238	-1.0456	-0.682945	-0.652872
AT5G28540	Q9LKR3;Q8H1B3-2;Q8H1B3	Mediator of RNA polymerase II transcription subunit 37a	MED37A	MD37A_ARATH	MED37A	cellular response to heat;cellular response to unfolded protein;chaperone cofactor-dependent protein refolding;endoplasmic reticulum unfolded protein response;protein refolding;response to unfolded protein;ubiquitin-dependent ERAD pathway	ATP binding;ATPase activity;ATPase activity, coupled;heat shock protein binding;misfolded protein binding;protein binding involved in protein folding;unfolded protein binding	cell wall;chloroplast;cytoplasm;cytosol;endoplasmic reticulum;endoplasmic reticulum chaperone complex;endoplasmic reticulum lumen;Golgi apparatus;mediator complex;membrane;nucleus;plasma membrane;plasmodesma;vacuolar membrane;vacuole	41	39	5	56.4	53.8	10.9	73.628	273.58	12748000000	593	2.20137	0.0223837	-0.291198	-3.67218	Component of the Mediator complex, a coactivatorinvolved in the regulated transcription of nearly all RNApolymerase II-dependent genes. Mediator functions as a bridge toconvey information from gene-specific regulatory proteins to thebasal RNA polymerase II transcription machinery. The Mediatorcomplex, having a compact conformation in its free form, isrecruited to promoters by direct interactions …		Endoplasmic reticulum lumen{ECO:0000255|PROSITE-ProRule:PRU10138}. Nucleus {ECO:0000305}.	-0.804095	0.281089	-0.449519	-0.804095	-1.98131	0.235886	0.795127	0.998837	1.265	0.463078
AT5G28500	Q9LKR8;Q9LKR8-2	Rubisco accumulation factor 1, chloroplastic	RAF1	RAF1_ARATH	RAF1.1			chloroplast;chloroplast stroma	9	9	9	39.4	39.4	39.4	48.236	177.52	1081300000	115	2.18137	0.0229122	0.816661	3.64029	Required for assembly or stability of RuBisCO. Acts at apostchaperonin step to fold and/or assemble the large subunit(rbcL) into RuBisCO. RAF1 binds first to a rbcL dimer (rbcL(2)),leading to a rbcL(8)-RAF1(4) complex formation. In the next step,RBCS displaces RAF1, thus resulting in holoenzyme formation		Plastid, chloroplast {ECO:0000305}.	0.625374	0.645768	0.148014	1.44784	0.878677	0.206924	-0.658633	-1.02877	-1.90755	-0.357643
AT1G15820	Q9LMQ2		F7H2.16	Q9LMQ2_ARATH	CHLOROPHYLL	nonphotochemical quenching;photosynthesis;photosynthesis, light harvesting in photosystem I;protein-chromophore linkage;response to light stimulus	chlorophyll binding;protein domain specific binding	chloroplast;chloroplast envelope;chloroplast thylakoid;chloroplast thylakoid membrane;integral component of membrane;membrane;photosystem I;photosystem II antenna complex;plastoglobule;thylakoid	19	19	19	63.6	63.6	63.6	27.522	323.31	159530000000	527	2.51481	0.0141622	-0.432726	-4.18556	The light-harvesting complex (LHC) functions as a lightreceptor, it captures and delivers excitation energy tophotosystems with which it is closely associated		Plastid, chloroplast thylakoid membrane{ECO:0000256|RuleBase:RU363080, ECO:0000256|SAAS:SAAS00625777}.	-1.61902	-0.0107543	-0.613218	-1.07872	-0.608478	1.65722	0.682747	0.917457	0.643125	0.0296437
AT1G12270	Q9LNB6	Hsp70-Hsp90 organizing protein 1	HOP1	HSOP1_ARATH	HOP1	chaperone-mediated protein complex assembly	Hsp90 protein binding;preprotein binding	cytosol;nucleus	11	9	9	31.5	27.6	27.6	64.584	29.845	414370000	61	1.91163	0.0355947	0.301805	3.21906	Mediates the association of the molecular chaperonesHSP70 and HSP90. Mediates nuclear encoded chloroplast preproteinsbinding to HSP90 prior to chloroplastic sorting (By similarity)		Cytoplasm {ECO:0000250}. Nucleus{ECO:0000250}.	1.29695	1.31075	0.383454	-0.0953748	0.667552	-1.34675	0.633646	-1.05505	-1.06845	-0.726724
AT1G18500	Q9LPR4	2-isopropylmalate synthase 1, chloroplastic	IPMS1	LEU11_ARATH	IPMS1	leucine biosynthetic process	2-isopropylmalate synthase activity	chloroplast;chloroplast stroma	17	17	5	33.4	33.4	12.8	68.675	127.03	1055400000	164	1.82585	0.0394582	0.970887	3.08807	Catalyzes the condensation of the acetyl group ofacetyl-CoA with 3-methyl-2-oxobutanoate (2-oxoisovalerate) to form3-carboxy-3-hydroxy-4-methylpentanoate (2-isopropylmalate).Involved in Leu biosynthesis, but do not participate in the chainelongation of glucosinolates.	Expressed in roots, stems, leaves, flowers andsiliques. {ECO:0000269|PubMed:17189332}.	Plastid, chloroplast {ECO:0000305}.	0.709091	-0.0293144	0.206607	1.46254	1.149	-0.99714	-0.276434	-0.820262	0.362176	-1.76627
AT1G32500	Q9LQK7	Protein ABCI7, chloroplastic	ABCI7	AB7I_ARATH	ABCI7	embryo development ending in seed dormancy;iron-sulfur cluster assembly;thylakoid membrane organization	transporter activity	chloroplast;chloroplast stroma;plastid	6	6	6	15.2	15.2	15.2	52.824	60.331	814370000	113	2.22339	0.0219228	0.338114	3.70739			Plastid, chloroplast{ECO:0000269|PubMed:15184673}.	0.802794	0.638236	-0.355771	1.06262	1.62335	-0.448926	-0.905977	-0.767057	-1.56167	-0.0875996
AT1G07750	Q9LQQ3;Q9SIA7		F24B9.13	Q9LQQ3_ARATH			copper ion binding;nutrient reservoir activity;zinc ion binding	cytosol;Golgi apparatus;plasmodesma	9	9	9	36.8	36.8	36.8	38.31	32.075	663120000	99	1.86765	0.0370772	-0.542069	-3.15174				-1.23065	0.355109	0.0212051	-1.54863	-1.12732	-0.22909	1.0885	0.709121	0.86809	1.09367
AT1G23290	Q9LR33	60S ribosomal protein L27a-2	RPL27AB	R27A2_ARATH	RPL27AB	flower development;inflorescence development;post-embryonic development;translation	structural constituent of ribosome	cytosolic large ribosomal subunit;cytosolic ribosome;nucleolus;plasmodesma	6	6	1	44.5	44.5	12.3	16.292	36.073	1749600000	109	1.75691	0.0442932	0.450851	2.98367				0.544215	0.484627	0.799321	0.435129	1.17917	-1.7827	-0.451923	-1.03341	-1.03189	0.85747
AT1G05560	Q9LR44;A0A1P8AP70	UDP-glycosyltransferase 75B1	UGT75B1	A0A1P8AP70_ARATH;U75B1_ARATH	UGT75B1	cell plate formation involved in plant-type cell wall biogenesis;para-aminobenzoic acid metabolic process;response to salicylic acid	indole-3-acetate beta-glucosyltransferase activity;quercetin 3-O-glucosyltransferase activity;quercetin 7-O-glucosyltransferase activity;transferase activity, transferring hexosyl groups;UDP-glucose:4-aminobenzoate acylglucosyltransferase activity;UDP-glucosyltransferase activity;UDP-glycosyltransferase activity	cytoskeleton;Golgi apparatus;intracellular membrane-bounded organelle;perinuclear region of cytoplasm;phragmoplast	12	12	11	42.2	42.2	40.1	52.813	295.24	873660000	138	5.13759	0	1.70437	10.2066	Possesses low catalytic activity on indole-3-acetic acid(IAA) in vitro. May transfer UDP-glucose from sucrose synthase tocallose synthase for the synthesis of callose at the forming cellplate during cytokinesis. Has high affinity for 4-aminobenzoate.Catalyzes the formation of 4-aminobenzoate glucose ester whichrepresents a storage form of 4-aminobenzoate in the vacuole. Isthe major source of this…		Cytoplasm, perinuclear region{ECO:0000269|PubMed:11283335}. Cytoplasm, cytoskeleton,phragmoplast {ECO:0000269|PubMed:11283335}. Note=Duringinterphase, distributed in a punctate pattern in the perinuclearregion. Localized in the forming cell plate during cytokinesis.	0.793875	0.865071	0.868995	0.921724	1.12148	-0.685785	-1.21477	-0.351366	-1.1511	-1.16812
AT1G03475	Q9LR75;Q93Z96;Q93Z96-2	Coproporphyrinogen-III oxidase 1, chloroplastic	CPX1	HEM61_ARATH	CPX1	chlorophyll biosynthetic process;protoporphyrinogen IX biosynthetic process from glutamate;response to cytokinin	coproporphyrinogen oxidase activity;protein homodimerization activity	apoplast;chloroplast;chloroplast stroma;cytoplasm;cytosol	21	21	21	71.5	71.5	71.5	43.796	118.73	7836400000	316	2.55332	0.0131888	0.286807	4.25058	Key enzyme in heme biosynthesis. Catalyzes the oxidativedecarboxylation of propionic acid side chains of rings A and B ofcoproporphyrinogen III.	Expressed in cotyledons, leaves and roots.{ECO:0000269|Ref.2}.	Plastid, chloroplast {ECO:0000269|Ref.2}.Plastid {ECO:0000269|Ref.2}.	1.2981	0.427357	0.195042	1.08904	0.93949	-0.855571	0.0856125	-0.303288	-1.26581	-1.60998
AT3G24190	Q9LRN0		At3g24190	Q9LRN0_ARATH			ATP binding;protein kinase activity	chloroplast	7	7	7	15	15	15	87.436	20.04	245740000	50	2.58441	0.0128033	-0.327707	-4.30341				-0.707532	-0.42601	-1.31434	-0.842627	-0.673396	1.15035	-0.0796209	0.359947	0.650522	1.8827
AT3G14420	Q9LRR9;Q2V3V9;Q9LRR9-2;A8MS37;B3H4B8;A0A1P8B993	Peroxisomal (S)-2-hydroxy-acid oxidase GLO1	GLO1;At3g14420	A8MS37_ARATH;B3H4B8_ARATH;GLO1_ARATH;Q2V3V9_ARATH	GLO1;GOX1	defense response to bacterium;hydrogen peroxide biosynthetic process;oxidative photosynthetic carbon pathway;response to cytokinin	FMN binding;glycolate oxidase activity;long-chain-(S)-2-hydroxy-long-chain-acid oxidase activity;medium-chain-(S)-2-hydroxy-acid oxidase activity;oxidoreductase activity;very-long-chain-(S)-2-hydroxy-acid oxidase activity	apoplast;chloroplast;chloroplast stroma;cytosolic ribosome;membrane;nucleus;peroxisome;plasmodesma	38	38	12	89.6	89.6	28.9	40.341	323.31	90065000000	1321	2.72751	0.00975701	0.304417	4.55065				1.37992	0.292864	0.0145171	1.43517	0.906181	-0.631917	-1.50313	-0.622467	-0.26484	-1.0063
AT3G18490	Q9LS40	Protein ASPARTIC PROTEASE IN GUARD CELL 1	ASPG1	ASPG1_ARATH	ASPG1	protein catabolic process;proteolysis;response to abscisic acid;response to water deprivation;systemic acquired resistance	aspartic-type endopeptidase activity;aspartic-type peptidase activity;DNA binding	endoplasmic reticulum	12	12	12	34.6	34.6	34.6	53.233	323.31	2913900000	183	2.46791	0.0154222	-0.63059	-4.10698	Aspartic protease involved in drought avoidance throughabscisic acid signaling.	Expressed in young seedlings, leaves, guard-cells, stems, flowers and siliques, but not in roots or mesophyllcells. {ECO:0000269|PubMed:22268147}.	Endoplasmic reticulum{ECO:0000269|PubMed:22268147}.	-0.896741	0.0255842	0.114301	-1.36676	-1.78299	0.927236	0.860974	0.833868	0.724917	0.559611
AT3G18420	Q9LS48	protein SLOW GREEN 1, chloroplastic	SG1	SG1_ARATH	SG1	chloroplast organization		chloroplast;chloroplast envelope;plastid	5	5	5	22.8	22.8	22.8	35.63	14.726	146350000	42	2.21437	0.0220645	1.17607	3.69295	Required for the early stage of chloroplast development.May be involved in chloroplast protein biosynthesis and/ordegradation.	Ubiquitous. Preferentially expressed in newlyformed green tissues. {ECO:0000269|PubMed:24420572}.	Plastid, chloroplast{ECO:0000269|PubMed:24420572}. Note=Accumulates as spots in thechloroplast. {ECO:0000269|PubMed:24420572}.	-0.0805874	1.21834	0.667247	0.421821	1.53898	-0.872011	-1.23505	-0.00822225	-0.165859	-1.48466
AT3G17020	Q9LSP5;A0A1I9LPQ2		At3g17020	A0A1I9LPQ2_ARATH;Q9LSP5_ARATH		response to cold	hydrolase activity	plasma membrane	6	6	6	55.8	55.8	55.8	17.775	137.53	1181800000	101	1.99493	0.0304262	-0.420559	-3.34752				-0.435801	0.254425	-0.2222	-1.03466	-2.18501	0.692578	0.754935	1.11139	0.529654	0.534689
AT5G49910	Q9LTX9;Q9LTX9-2	Heat shock 70 kDa protein 7, chloroplastic	HSP70-7	HSP7G_ARATH	HSP70-7	cellular response to heat;cellular response to unfolded protein;chaperone cofactor-dependent protein refolding;protein refolding;protein targeting to chloroplast;response to cadmium ion;response to heat;response to unfolded protein	ATP binding;ATPase activity;ATPase activity, coupled;heat shock protein binding;misfolded protein binding;protein binding involved in protein folding;unfolded protein binding	apoplast;chloroplast;chloroplast envelope;chloroplast stroma;cytoplasm;plastid stroma;thylakoid	52	16	16	53.8	20.3	20.3	76.996	99.213	8301800000	263	2.83355	0.00812435	0.415923	4.73834	Acts redundantly with HSP70-6 in the thermotolerance ofgerminating seeds. Plays an important role in the proteinprecursor import into chloroplasts.		Plastid, chloroplast stroma{ECO:0000269|PubMed:18997426, ECO:0000269|PubMed:20506024}.	0.957232	0.281848	0.640209	1.00789	1.18579	-0.620929	-1.43777	-0.493949	0.0522667	-1.57258
AT5G48220	Q9LUB2;F4K083;A8MS79		At5g48220	A8MS79_ARATH;F4K083_ARATH;Q9LUB2_ARATH	MIF21.11	tryptophan biosynthetic process;tryptophan metabolic process	indole-3-glycerol-phosphate synthase activity;phosphoribosylanthranilate isomerase activity	chloroplast;chloroplast stroma;chloroplast thylakoid	12	12	12	36.7	36.7	36.7	41.968	185.71	805390000	87	1.90793	0.0355043	0.355626	3.21338				1.16465	0.334712	-0.720632	1.305	1.47685	-0.351027	-1.03662	-0.50228	-1.21115	-0.459511
AT3G23600	Q9LUG8;F4J447		At3g23600	F4J447_ARATH;Q9LUG8_ARATH		response to salt stress	hydrolase activity	apoplast;cytoplasm;cytosol;nucleus;plasma membrane	14	14	14	86.2	86.2	86.2	25.861	144.73	3243800000	230	2.7721	0.00932683	-0.305477	-4.62909				-1.58676	0.142845	-0.324905	-1.3582	-0.920628	1.20537	0.57758	0.498546	0.697019	1.06914
AT3G17810	Q9LVI9	Dihydropyrimidine dehydrogenase (NADP(+)), chloroplastic	PYD1	DPYD_ARATH	PYD1	beta-alanine biosynthetic process;cellular response to nitrogen levels;thymine catabolic process;uracil catabolic process	dihydropyrimidine dehydrogenase (NADP+) activity;dihydrouracil dehydrogenase (NAD+) activity;iron-sulfur cluster binding;NADH dehydrogenase activity;NADP binding;protein homodimerization activity;uracil binding	chloroplast;chloroplast stroma;plastid	11	11	11	35.9	35.9	35.9	46.846	53.537	1361300000	148	1.88023	0.036518	-0.467559	-3.17096	Involved in pyrimidine base degradation. Catalyzes thereduction of uracil to 5,6-dihydrouracil (DHU) by using NADH as aspecific cosubstrate and the reduction of thymine to 5,6-dihydrothymine (DHT). Involved in the recycling of nitrogen fromnucleobases to general nitrogen metabolism	Expressed in roots, leaves, stems, siliquesand flowers. Highly expressed ion dry seeds.{ECO:0000269|PubMed:21865177}.	Plastid, chloroplast{ECO:0000269|PubMed:19413687, ECO:0000269|PubMed:21865177}.	-1.83761	0.129108	0.0801433	-0.723011	-1.18847	0.0129553	0.497232	0.547484	1.37743	1.10473
AT3G14067	Q9LVJ1		At3g14067	SBT14_ARATH	SBT1.4	leaf senescence;secondary shoot formation	serine-type endopeptidase activity	apoplast;plant-type cell wall;vacuolar membrane;vacuole	12	12	12	29.1	29.1	29.1	81.816	303.69	5198800000	259	1.95901	0.0327298	-0.271819	-3.29196			Secreted {ECO:0000250|UniProtKB:Q84WS0}.	-1.06942	0.0764426	-0.113588	-0.862009	-1.62925	-0.0586028	0.859137	0.0813908	1.31413	1.40177
AT5G58250	Q9LVM3		At5g58250	Q9LVM3_ARATH	EMB3143			chloroplast;thylakoid	6	6	6	40.3	40.3	40.3	24.104	55.75	1008300000	97	2.20062	0.0223188	0.701569	3.67098				0.7809	-0.0616994	1.24179	1.35222	0.444261	-0.503548	0.0525865	-0.99276	-1.82764	-0.486105
AT5G47210	Q9LVT8;Q9LVT8-3;Q9LVT8-2		At5g47210	RGGC_ARATH	RGGC		mRNA binding	nucleus;perinuclear region of cytoplasm;plasma membrane	20	20	16	60.5	60.5	57.1	37.999	211.53	4582400000	321	2.31959	0.0192933	0.299322	3.86266	Binds RNA.		Nucleus {ECO:0000250|UniProtKB:Q9SQ56}.Cytoplasm, perinuclear region {ECO:0000250|UniProtKB:O23523}.	0.414874	1.01966	0.866572	0.110709	1.41528	-1.34279	-1.20793	-1.24467	0.308235	-0.339936
AT3G16000	Q9LW85	MAR-binding filament-like protein 1	MFP1	MFP1_ARATH	MFP1	regulation of starch biosynthetic process;starch biosynthetic process	DNA binding	chloroplast;chloroplast thylakoid;chloroplast thylakoid membrane;nuclear matrix;plastid nucleoid	35	35	35	47.7	47.7	47.7	81.972	214.91	3056900000	348	1.91157	0.0355165	0.211406	3.21895	Binds DNA. Interacts with chromatin via matrixattachment regions (MARs). Likely to participate in nucleararchitecture by connecting chromatin with the nuclear matrix andpotentially with the nuclear envelope (By similarity)		Nucleus matrix {ECO:0000250}.	1.62221	1.02417	0.721316	0.720583	-0.524996	-1.56631	-1.0178	-0.627151	-0.348976	-0.00304383
AT3G60340	Q9LY31		F27H5_130	Q9LY31_ARATH	F27H5_130		palmitoyl hydrolase activity	cytosol;vacuole	3	3	3	14.2	14.2	14.2	37.083	9.3561	123530000	25	2.13212	0.0241514	-1.06669	-3.5622				-0.790137	0.341168	-0.611873	-0.659273	-1.9947	1.36883	0.813797	0.257672	0.468602	0.805914
AT3G63490	Q9LY66;F4J296	50S ribosomal protein L1, chloroplastic;Ribosomal protein	RPL1;At3g63490	F4J296_ARATH;RK1_ARATH	EMB3126;RPL1	maturation of LSU-rRNA;translation	RNA binding;rRNA binding;structural constituent of ribosome	chloroplast;chloroplast envelope;chloroplast stroma;chloroplast thylakoid membrane;cytosolic large ribosomal subunit;large ribosomal subunit;membrane;nucleus	19	19	19	53.2	53.2	53.2	37.632	323.31	8122900000	316	3.23131	0.00403226	0.534172	5.48056	This protein binds directly to 23S ribosomal RNA		Plastid, chloroplast.	1.5066	0.603024	0.269597	0.871834	0.964121	-0.649717	-0.711528	-0.316771	-0.846162	-1.691
AT5G11670	Q9LYG3;A0A1P8BDF1;A0A1P8BDG6;Q9XGZ0;A0A1P8B1I3;O82191	NADP-dependent malic enzyme 2	NADP-ME2	MAOP2_ARATH	NADP-ME2	malate metabolic process;pentose-phosphate shunt, oxidative branch;protein homooligomerization;pyruvate metabolic process;response to cadmium ion	malate dehydrogenase (decarboxylating) (NAD+) activity;malate dehydrogenase (decarboxylating) (NADP+) activity;malic enzyme activity;metal ion binding;NAD binding;oxaloacetate decarboxylase activity	apoplast;cell wall;chloroplast;cytosol;membrane;plasma membrane;plasmodesma;vacuolar membrane	38	38	37	90	90	86.9	64.412	323.31	19811000000	790	2.60862	0.0121362	-0.627855	-4.34478		Expressed in leaves, stems, flowers and roots.Particularly present in vasculatures, trichome basal cells andhydatodes. {ECO:0000269|PubMed:16113210}.	Cytoplasm {ECO:0000269|PubMed:19725876}.	-0.956405	0.150096	-0.195672	-1.46235	-1.51094	0.353072	0.797591	0.739846	1.28909	0.795683
AT5G13200	Q9LYV6;A0A1P8BC46	GEM-like protein 5		A0A1P8BC46_ARATH;GEML5_ARATH		embryo development ending in seed dormancy;maintenance of seed dormancy by absisic acid;regulation of seed germination;seed germination			7	7	7	32.7	32.7	32.7	30.07	26.373	447980000	65	3.589	0.00263529	-0.989832	-6.20638				-1.40309	-0.361733	-0.532581	-0.893665	-1.12526	0.519714	1.14181	1.25614	1.15877	0.239884
AT5G03350	Q9LZF5	Lectin-like protein At5g03350		LECT6_ARATH	LLP	cellular response to salicylic acid stimulus;systemic acquired resistance	carbohydrate binding;kinase activity	apoplast;cell wall;chloroplast;plasma membrane	8	8	8	40.5	40.5	40.5	30.162	98.107	1139200000	125	2.87853	0.00765217	-1.82874	-4.81919	Plays a positive role in the effector-triggered immunity(ETI) response (PubMed:19199050, PubMed:24006883). Involved insalicylic acid (SA)-mediated processes occurring in ETI response,but is not involved in the autophagy process (PubMed:24006883).Promotes systemic rather than local immunity (PubMed:24755512).Essential for systemic acquired resistance (SAR), but notnecessary for immune signaling do…	Expressed in seedlings and leaves of adultplants. {ECO:0000269|PubMed:24006883}.	Secreted, extracellular space, apoplast{ECO:0000269|PubMed:24006883, ECO:0000269|PubMed:24755512}. Cellmembrane {ECO:0000269|PubMed:24006883}. Note=Tightly bound to theapoplastic side of the plasma membrane.{ECO:0000269|PubMed:24006883}.	-1.21119	0.188064	-0.262168	-1.14689	-1.6587	0.893758	0.759325	0.821215	0.754253	0.862329
AT4G09020	Q9M0S5	Isoamylase 3, chloroplastic	ISA3	ISOA3_ARATH	ISA3	starch catabolic process	isoamylase activity	chloroplast;chloroplast starch grain;chloroplast stroma	14	14	14	29.1	29.1	29.1	86.321	323.31	1494600000	202	2.96388	0.00621176	-0.764653	-4.97468	Involved in starch catabolism. ISA3 removes differentbranches than ISA1-ISA2, namely short chains that preventamylopectin crystallization. May be the debranching enzymerequired to assist beta-amylases for starch degradation in leavesat night.		Plastid, chloroplast{ECO:0000269|PubMed:16495218, ECO:0000269|PubMed:18431481}.Note=Localizes to granule-like structures inside the chloroplast.	-1.20487	-0.742827	-0.739552	-0.259535	-1.17673	-0.209403	0.765305	1.17311	0.9473	1.4472
AT3G43540	Q9M236;F4IZ56		T18D12_110;At3g43540	F4IZ56_ARATH;Q9M236_ARATH	T18D12_110		translation initiation factor activity	chloroplast	9	9	9	34.6	34.6	34.6	40.979	28.11	1178600000	116	2.29508	0.0196883	-0.290974	-3.82287				-0.629512	-0.773637	-0.324384	-1.23726	-0.848404	-0.253976	0.151704	0.805951	1.75194	1.35758
AT3G55400	Q9M2T9;A8MRF2		T22E16.60;OVA1	A8MRF2_ARATH;SYMM_ARATH	OVA1	methionyl-tRNA aminoacylation;plant ovule development	ATP binding;methionine-tRNA ligase activity	chloroplast;chloroplast stroma;cytoplasm;mitochondrion	11	11	11	24.7	24.7	24.7	69.273	116	719150000	98	2.89353	0.00742541	0.483964	4.84631			Plastid, chloroplast{ECO:0000269|PubMed:17433818, ECO:0000269|PubMed:9724821}.Mitochondrion {ECO:0000269|PubMed:17433818,ECO:0000269|PubMed:9724821}.	1.14028	0.275979	0.770553	0.673466	1.23647	-1.70768	-0.225299	-0.510781	-0.350344	-1.30264
AT3G61820	Q9M356		F15G16.210	Q9M356_ARATH	F15G16.210	protein catabolic process;proteolysis	aspartic-type endopeptidase activity	plant-type cell wall;plasmodesma	8	8	8	22.8	22.8	22.8	51.461	35.655	861030000	90	5.06259	0	-0.852887	-9.97351				-1.20679	-0.976044	-0.507128	-0.677367	-1.19613	1.15889	0.521426	0.971997	1.12638	0.784764
AT3G56940	Q9M591;F4J0U9	Magnesium-protoporphyrin IX monomethyl ester [oxidative] cyclase, chloroplastic	CRD1	CRD1_ARATH;F4J0U9_ARATH	CRD1	chlorophyll biosynthetic process;chloroplast organization;photosynthesis;regulation of tetrapyrrole metabolic process	DNA binding;magnesium-protoporphyrin IX monomethyl ester (oxidative) cyclase activity;metal ion binding	chloroplast;chloroplast envelope;chloroplast inner membrane;chloroplast thylakoid;chloroplast thylakoid membrane	18	18	18	47.9	47.9	47.9	47.63	131.59	3224700000	273	2.54928	0.0131633	0.760534	4.24375	Catalyzes the formation of the isocyclic ring inchlorophyll biosynthesis. Mediates the cyclase reaction, whichresults in the formation of divinylprotochlorophyllide (Pchlide)characteristic of all chlorophylls from magnesium-protoporphyrinIX 13-monomethyl ester (MgPMME).		Peripheral membrane protein.;Peripheral membrane protein. Plastid, chloroplast thylakoidmembrane;Plastid, chloroplast inner membrane	1.23289	0.837035	0.401487	0.939686	0.535977	-0.41454	-0.303367	-0.00931804	-1.6002	-1.61966
AT5G06870	Q9M5J8	Polygalacturonase inhibitor 2	PGIP2	PGIP2_ARATH	PGIP2		polygalacturonase inhibitor activity	cell wall;extracellular region;membrane;plant-type cell wall;plasmodesma	7	7	7	37.3	37.3	37.3	37.067	51.521	649010000	65	4.12277	0.00221053	1.06144	7.41132	Inhibitor of fungal polygalacturonase. It is animportant factor for plant resistance to phytopathogenic fungi		Peripheral membraneprotein.;Secreted, cell wall{ECO:0000250|UniProtKB:P58822}. Membrane	0.232763	1.06973	0.690245	1.35693	1.08199	-0.772261	-1.08439	-0.63717	-1.32755	-0.610289
AT5G06860	Q9M5J9	Polygalacturonase inhibitor 1	PGIP1	PGIP1_ARATH	PGIP1		polygalacturonase inhibitor activity	cell wall;extracellular region;Golgi apparatus;membrane;plant-type cell wall;plasmodesma	6	6	6	26.4	26.4	26.4	36.689	11.07	129320000	24	2.34984	0.0182237	1.62574	3.91199	Inhibitor of fungal polygalacturonase. It is animportant factor for plant resistance to phytopathogenic fungi		Peripheral membraneprotein.;Secreted, cell wall{ECO:0000250|UniProtKB:P58822}. Membrane	1.05849	0.95488	0.849421	0.788858	0.192295	-0.880473	-0.295704	0.0234574	-2.08806	-0.603168
AT3G17240	Q9M5K2;Q9M5K2-2	Dihydrolipoyl dehydrogenase 2, mitochondrial	LPD2	DLDH2_ARATH	LPD2	cell redox homeostasis;response to cadmium ion	ATP binding;cobalt ion binding;copper ion binding;dihydrolipoyl dehydrogenase activity;electron transfer activity;flavin adenine dinucleotide binding;zinc ion binding	apoplast;chloroplast;mitochondrial matrix;mitochondrial respiratory chain complex I;mitochondrion	31	18	18	73.4	52.1	52.1	53.985	150.55	3674400000	337	2.45963	0.0155182	-0.334174	-4.09317	Lipoamide dehydrogenase is a component of the glycinedecarboxylase (GDC) or glycine cleavage system as well as of thealpha-ketoacid dehydrogenase complexes. LPD1 is probably theprotein most often associated with the glycine decarboxylasecomplex while LPD2 is probably incorporated into alpha-ketoaciddehydrogenase complexes.	Preferentially expressed in roots, flowers andsiliques and at a lower level in stems and leaves.{ECO:0000269|PubMed:11598235}.	Mitochondrion matrix{ECO:0000269|PubMed:14671022, ECO:0000269|PubMed:14764908,ECO:0000305|PubMed:25732537}.	-1.62761	0.414081	-0.384881	-1.28481	-1.01915	0.390391	0.612322	0.905653	1.05322	0.940783
AT1G48030	Q9M5K3	Dihydrolipoyl dehydrogenase 1, mitochondrial	LPD1	DLDH1_ARATH	LPD1	cell redox homeostasis;response to cadmium ion	ATP binding;cobalt ion binding;copper ion binding;dihydrolipoyl dehydrogenase activity;electron transfer activity;flavin adenine dinucleotide binding;zinc ion binding	apoplast;mitochondrial matrix;mitochondrial respiratory chain complex I;mitochondrion	39	39	26	74.2	74.2	62.3	53.987	323.31	26273000000	883	1.7027	0.0480503	-0.151756	-2.90207	Lipoamide dehydrogenase is a component of the glycinedecarboxylase (GDC) or glycine cleavage system as well as of thealpha-ketoacid dehydrogenase complexes. LPD1 is probably theprotein most often associated with the glycine decarboxylasecomplex while LPD2 is probably incorporated into alpha-ketoaciddehydrogenase complexes.	Preferentially expressed in leaves, flowersand siliques and at a lower level in roots and stems.{ECO:0000269|PubMed:11598235}.	Mitochondrion matrix{ECO:0000269|PubMed:14671022, ECO:0000305|PubMed:25732537,ECO:0000305|PubMed:25862457}.	-0.889721	-0.810173	-1.18296	-0.456629	-0.0574375	0.844676	-0.545826	0.927008	2.01109	0.159979
AT3G06050	Q9M7T0;A0A1I9LRF4	Peroxiredoxin-2F, mitochondrial	PRXIIF	PRX2F_ARATH	PRXIIF	cell redox homeostasis;cellular response to oxidative stress;hydrogen peroxide catabolic process;response to cadmium ion;response to oxidative stress	peroxidase activity;thioredoxin peroxidase activity	cytoplasm;mitochondrial matrix;mitochondrion	11	11	11	59.7	59.7	59.7	21.445	217.8	2729800000	118	1.74284	0.0455178	-0.486263	-2.96245	Thiol-specific peroxidase that catalyzes the reductionof hydrogen peroxide and organic hydroperoxides to water andalcohols, respectively. Plays a role in cell protection againstoxidative stress by detoxifying peroxides. Reduces preferentiallyhydrogen peroxide rather than alkyl peroxides. May be involved inmitochondrial redox homeostasis.	Expressed in the whole plant.{ECO:0000269|PubMed:12913160, ECO:0000269|Ref.7}.	Mitochondrion matrix{ECO:0000269|PubMed:11743114, ECO:0000269|PubMed:12492832,ECO:0000269|PubMed:14671022, ECO:0000269|PubMed:15632145,ECO:0000305|PubMed:25732537}.	-1.91769	-0.252895	0.0666552	-0.747232	-0.579652	0.0301754	1.44681	0.562855	-0.0049964	1.39597
AT1G80480	Q9M8L6		T21F11.27	Q9M8L6_ARATH	PTAC17			chloroplast;chloroplast stroma;nucleoid;plastid chromosome	14	14	12	39.6	39.6	37.2	49.487	34.599	1565600000	154	1.80402	0.0410176	0.478109	3.05493				1.29258	-0.295614	-0.00655566	0.878338	1.6119	-0.344747	-0.730671	-0.740408	-0.0307499	-1.63408
AT3G03250	Q9M9P3;A0A1I9LT03;A0A1I9LT02	Probable UTP--glucose-1-phosphate uridylyltransferase 2		A0A1I9LT02_ARATH;A0A1I9LT03_ARATH;UGPA2_ARATH	UGP1;UGP2	callose deposition in cell wall;cellular response to phosphate starvation;glycogen metabolic process;pollen development;response to salt stress;sucrose metabolic process;UDP-glucose metabolic process	UTP:glucose-1-phosphate uridylyltransferase activity	cytoplasm;cytosol;plasma membrane;pollen tube	34	34	18	75.3	75.3	41.8	51.738	323.31	13244000000	694	3.80611	0.00190164	-0.350534	-6.67762	Converts glucose 1-phosphate to UDP-glucose, which isthe major glycosyl donor for polysaccharides. Acts redundantlywith UGP1 and is essential for the synthesis of sucrose, starchand cell wall, and callose deposition	Expressed in cauline leaves, flowers andsiliques. {ECO:0000269|PubMed:19366709}.	Cytoplasm {ECO:0000250}.	-0.645798	-0.696011	-0.808273	-1.60026	-0.617421	1.49173	0.855169	0.807132	0.888441	0.325288
AT1G53310	Q9MAH0	Phosphoenolpyruvate carboxylase 1	PPC1	CAPP1_ARATH	PPC1	carbon fixation;cellular response to phosphate starvation;leaf development;photosynthesis;protein tetramerization;tricarboxylic acid cycle	phosphoenolpyruvate carboxylase activity	apoplast;chloroplast;cytosol	45	28	17	57.1	41.4	31.2	110.28	237.99	4203600000	307	3.21647	0.00396899	-0.459797	-5.4517	Through the carboxylation of phosphoenolpyruvate (PEP)it forms oxaloacetate, a four-carbon dicarboxylic acid source forthe tricarboxylic acid cycle. Contributes probably to theadaptation to inorganic phosphate (Pi) deprivation	Expressed in all plant organs, with higherlevels in roots. {ECO:0000269|PubMed:12805623,ECO:0000269|PubMed:19228119}.	Cytoplasm {ECO:0000250}.	-1.05249	-0.171283	-0.709552	-0.735814	-1.54134	0.691171	0.862869	1.53381	0.905794	0.216834
AT1G53280	Q9MAH3;A0A1P8AUR1	Protein DJ-1 homolog B	DJ1B	A0A1P8AUR1_ARATH;DJ1B_ARATH	DJ1B	glutamine metabolic process;guanine deglycation, glyoxal removal;protein deglycation, glyoxal removal	glyoxalase III activity;protein deglycase activity;transferase activity	chloroplast;chloroplast stroma;cytosol;nucleus	21	21	21	64.6	64.6	64.6	46.99	174.67	2806300000	195	3.61744	0.00268354	-0.663949	-6.26673	May be involved in oxidative stress response		Plastid, chloroplast{ECO:0000269|PubMed:20406884}.	-0.0964711	-0.825473	-0.657697	-1.54244	-1.20138	0.692445	0.991636	0.490236	1.21907	0.930062
AT3G28940	Q9MBH2		At3g28940	AIG2B_ARATH	AIG2B		protein domain specific binding;transferase activity, transferring acyl groups	chloroplast;plasma membrane	12	12	12	87.6	87.6	87.6	19.465	170.7	4757500000	233	4.7497	0	-0.945552	-9.04974	Putative gamma-glutamylcyclotransferase	Expressed in roots, leaves and stems.{ECO:0000305|PubMed:18214976}.		-1.25624	-0.813765	-0.266565	-1.12613	-1.06474	0.658836	1.15253	0.704163	1.054	0.957913
AT2G40300	Q9S756	Ferritin-4, chloroplastic	FER4	FRI4_ARATH	FER4	flower development;intracellular sequestering of iron ion;iron ion homeostasis;iron ion transport;leaf development;photosynthesis;response to bacterium;response to cold;response to cytokinin;response to hydrogen peroxide;response to iron ion;response to reactive oxygen species	ferric iron binding;ferrous iron binding;ferroxidase activity;identical protein binding;iron ion binding	chloroplast;chloroplast envelope;chloroplast stroma;chloroplast thylakoid membrane;cytoplasm;membrane;mitochondrion;thylakoid	6	6	5	24.7	24.7	20.8	29.029	33.094	338240000	42	2.07291	0.0269746	-0.890446	-3.46904	Stores iron in a soluble, non-toxic, readily availableform. Important for iron homeostasis. Has ferroxidase activity.Iron is taken up in the ferrous form and deposited as ferrichydroxides after oxidation (By similarity).		Plastid, chloroplast {ECO:0000250}.	-0.658927	-2.11735	-0.706704	-0.524215	0.33087	0.577185	0.951875	0.327679	1.22356	0.596031
AT1G58080	Q9S762	ATP phosphoribosyltransferase 1, chloroplastic	HISN1A	HIS1A_ARATH	HISN1A	histidine biosynthetic process	ATP phosphoribosyltransferase activity;magnesium ion binding	chloroplast;chloroplast stroma	4	3	3	17	12.2	12.2	44.556	20.865	341580000	58	2.88112	0.00764835	0.624928	4.82388	Catalyzes the condensation of ATP and 5-phosphoribose 1-diphosphate to form N'-(5'-phosphoribosyl)-ATP (PR-ATP).	Expressed in leaves and at lower levels inroots (at protein level). {ECO:0000269|PubMed:10712555}.	Plastid, chloroplast {ECO:0000305}.	0.991395	0.00514844	0.406393	0.777005	1.91196	-0.977516	-0.694667	-0.603073	-0.643052	-1.17359
AT4G29840	Q9S7B5	Threonine synthase 1, chloroplastic	TS1	THRC1_ARATH	TS1	threonine biosynthetic process	pyridoxal phosphate binding;threonine synthase activity	chloroplast;chloroplast stroma;cytoplasm;cytosol	25	25	21	57	57	47.5	57.776	216.11	5915600000	368	2.9758	0.00616667	0.313083	4.99661	Catalyzes the gamma-elimination of phosphate from L-phosphohomoserine and the beta-addition of water to produce L-threonine.		Plastid, chloroplast.	1.21429	1.14669	-0.0308929	0.849158	0.948694	-0.55022	-1.1949	-0.764874	-0.114656	-1.50328
AT5G43780	Q9S7D8	ATP sulfurylase 4, chloroplastic	APS4	APS4_ARATH	APS4	hydrogen sulfide biosynthetic process;sulfate assimilation	adenylylsulfate kinase activity;ATP binding;sulfate adenylyltransferase (ATP) activity	chloroplast;chloroplast stroma;mitochondrion	10	7	6	30.1	22.2	20.3	52.125	18.18	328450000	78	2.55984	0.013129	-0.322543	-4.26163		Expressed in roots and leaves.{ECO:0000269|PubMed:10806350}.	Plastid, chloroplast stroma{ECO:0000269|PubMed:10806350}.	-1.0847	-0.0816453	-1.19943	-0.187694	-1.39871	0.70852	0.281475	1.71177	0.409128	0.841277
AT1G03130;AT4G02770	Q9S7H1;Q9SA56	Photosystem I reaction center subunit II-1, chloroplastic;Photosystem I reaction center subunit II-2, chloroplastic	psaD1;PSAD2	PSAD1_ARATH;PSAD2_ARATH	psaD1;PSAD2	photosynthesis	protein domain specific binding	chloroplast;chloroplast envelope;chloroplast thylakoid;chloroplast thylakoid membrane;membrane;photosystem I reaction center;plastoglobule;thylakoid	20	20	20	76.4	76.4	76.4	22.598	323.31	100310000000	676	5.14869	0	-0.702373	-10.2415	PSAD can form complexes with ferredoxin and ferredoxin-oxidoreductase in photosystem I (PS I) reaction center. PSAD mayencode the ferredoxin-docking protein (By similarity);PsaD can form complexes with ferredoxin and ferredoxin-oxidoreductase in photosystem I (PS I) reaction center. PSAD mayencode the ferredoxin-docking protein.		Peripheral membrane protein {ECO:0000250}; Stromal side.; Stromalside {ECO:0000250}.;Peripheral membrane protein;Plastid, chloroplast thylakoid membrane;Plastid, chloroplast thylakoid membrane{ECO:0000250}	-0.996595	-1.01069	-0.883388	-1.1289	-0.552677	1.10915	1.18979	0.520629	0.58289	1.16979
AT2G05070	Q9S7J7		LHCB2.2	CB22_ARATH	LHCB2.2	cellular response to abscisic acid stimulus;photosynthesis, light harvesting in photosystem I;photosynthesis, light harvesting in photosystem II;positive regulation of reactive oxygen species biosynthetic process;protein-chromophore linkage;regulation of stomatal closure;response to cold;response to desiccation;response to far red light;response to high light intensity;response to light stimulus;…	chlorophyll binding;metal ion binding	chloroplast;chloroplast envelope;chloroplast thylakoid;chloroplast thylakoid membrane;integral component of membrane;photosystem I;photosystem II;plastoglobule;PSII associated light-harvesting complex II;thylakoid;vacuolar membrane	13	7	1	67.9	51.7	10.9	28.62	323.31	202270000000	458	2.22208	0.021858	-0.502457	-3.7053	The light-harvesting complex (LHC) functions as a lightreceptor, it captures and delivers excitation energy tophotosystems with which it is closely associated (By similarity).Mediates rapid phosphorylation and migration of LHCII-PSII tophotosystem I (PSI) after transition to state 2 (red) lightconditions, thus leading to the formation of PSI-PSII-LHCII andPSI-LHCII supercomplex to balance the rel…		Multi-pass membrane protein{ECO:0000255}.;Plastid, chloroplast thylakoid membrane{ECO:0000269|PubMed:23995216}	-0.46385	0.213075	-1.29155	-1.62257	-0.605547	0.999029	1.48673	0.885237	0.19322	0.206228
AT5G54270	Q9S7M0;Q9S7M0-2		LHCB3*1	CB3_ARATH	LHCB3	photosynthesis;photosynthesis, light harvesting in photosystem I;photosynthesis, light harvesting in photosystem II;protein-chromophore linkage;regulation of stomatal movement;response to abscisic acid;response to herbicide;response to high light intensity;response to light stimulus	chlorophyll binding;metal ion binding;protein domain specific binding;structural molecule activity	chloroplast;chloroplast envelope;chloroplast thylakoid;chloroplast thylakoid membrane;integral component of membrane;photosystem I;photosystem II;plastoglobule;thylakoid;thylakoid membrane	9	7	7	58.5	50.6	50.6	28.706	253.7	67438000000	301	1.90834	0.0355817	-0.389879	-3.214	The light-harvesting complex (LHC) functions as a lightreceptor, it captures and delivers excitation energy tophotosystems with which it is closely associated(PubMed:26562806). Modulates the rate of photosystem II (PSII)state transitions and influences PSII macrostructure(PubMed:19880802). Involved in PSII excitation energy transfer andcharge separation during photosynthesis in thylakoids(PubMed:…		Multi-pass membrane protein{ECO:0000255}.;Plastid, chloroplast thylakoid membrane{ECO:0000269|PubMed:16551629}	-0.567073	0.223564	-0.683943	-0.605286	-1.92815	0.0231315	0.555611	0.420373	0.887673	1.6741
AT2G40100	Q9S7W1;F4IGY6	Chlorophyll a-b binding protein CP29.3, chloroplastic	LHCB4.3	CB4C_ARATH;F4IGY6_ARATH	LHCB4.3	photosynthesis, light harvesting;photosynthesis, light harvesting in photosystem I;protein-chromophore linkage;response to blue light;response to far red light;response to light stimulus;response to red light	chlorophyll binding;metal ion binding	chloroplast;chloroplast envelope;chloroplast thylakoid;chloroplast thylakoid membrane;integral component of membrane;membrane;photosystem I;photosystem II;plastoglobule;thylakoid	9	7	7	50.4	46.7	46.7	30.211	106.03	3100200000	92	2.39314	0.0173381	-0.839957	-3.98305	The light-harvesting complex (LHC) functions as a lightreceptor, it captures and delivers excitation energy tophotosystems with which it is closely associated;The light-harvesting complex (LHC) functions as a lightreceptor, it captures and delivers excitation energy tophotosystems with which it is closely associated.		Multi-pass membrane protein.;Plastid, chloroplast thylakoid membrane;Plastid, chloroplast thylakoid membrane{ECO:0000256|RuleBase:RU363080, ECO:0000256|SAAS:SAAS00625777}.	-1.64846	-1.07569	0.236802	-1.05057	-0.329571	0.47189	0.144547	0.83824	1.20247	1.21034
AT3G07720	Q9S7W4		F17A17.6	Q9S7W4_ARATH	F17A17.6	nitrile biosynthetic process;response to zinc ion	enzyme regulator activity	cytoplasm;cytosol;nucleus	13	13	13	62.6	62.6	62.6	35.685	78.014	956750000	129	2.19893	0.0223584	0.619324	3.66829				0.00906533	1.04391	0.993406	1.1116	0.59846	0.244061	-1.0867	-0.669881	-0.372734	-1.87119
AT1G68560	Q9S7Y7;F4J6T7	Alpha-xylosidase 1	XYL1	XYL1_ARATH	XYL1	cell wall organization;response to cadmium ion;xylan catabolic process;xyloglucan metabolic process	alpha-D-xyloside xylohydrolase;alpha-L-arabinofuranosidase activity;carbohydrate binding;xylan 1,4-beta-xylosidase activity;xyloglucan 1,6-alpha-xylosidase activity	apoplast;cell wall;chloroplast;plant-type cell wall;plasmodesma	22	22	22	39.1	39.1	39.1	102.4	303.73	2079100000	284	2.11085	0.0250159	0.45715	3.52864	Glycoside hydrolase releasing xylosyl residues fromxyloglucan oligosaccharides at the non-reducing end. Has alpha-xylosidase activity against xylan oligosaccharides. Also hasalpha-glucosidase activity against p-nitrophenyl-alpha-D-glucopyranoside. No activity against p-nitrophenyl-D-xyloside	Expressed in roots, stems, leaves, flowers andsiliques. Expressed in cell types undergoing cell wallmodifications, including trichomes, vasculature, stomata, andelongating anther filaments. Not detected in pollen.{ECO:0000269|PubMed:16267099, ECO:0000269|PubMed:20801759}.	Secreted, cell wall. Secreted, extracellularspace, apoplast.	0.776701	0.802181	0.929696	0.474818	0.717767	-0.106179	0.159871	-0.31796	-1.94671	-1.49018
AT3G50820	Q9S841	Oxygen-evolving enhancer protein 1-2, chloroplastic	PSBO2	PSBO2_ARATH	PSBO2	photoinhibition;photosynthesis, light reaction;photosystem II assembly;photosystem II stabilization;regulation of protein dephosphorylation	oxygen evolving activity;poly(U) RNA binding	chloroplast;chloroplast stroma;chloroplast thylakoid;chloroplast thylakoid membrane;photosystem II oxygen evolving complex;plastoglobule;thylakoid;thylakoid lumen	28	10	10	65	35.3	35.3	35.019	323.31	32696000000	452	1.8181	0.0396778	-0.327061	-3.07629	Stabilizes the manganese cluster which is the primarysite of water splitting. Regulates dephosphorylation and turnoverof the PSII reaction center D1 protein		Lumenalside {ECO:0000269|PubMed:11719511}. Note=Associated with thephotosystem II complex.;Peripheral membrane protein {ECO:0000269|PubMed:11719511};Plastid, chloroplast thylakoid membrane{ECO:0000269|PubMed:11719511, ECO:0000269|PubMed:18431481}	-0.88615	0.873589	-1.00276	-0.737333	-1.73917	0.618303	0.223128	1.12559	0.672609	0.852191
AT3G01910	Q9S850;F4JBZ5;A8MRF8	Sulfite oxidase	SOX	F4JBZ5_ARATH;SUOX_ARATH	SOX	chlorophyll metabolic process;nitrate assimilation;response to sulfur dioxide;sulfur compound metabolic process	heme binding;molybdenum ion binding;molybdopterin cofactor binding;oxidoreductase activity;sulfite oxidase activity	mitochondrion;peroxisome	15	15	15	58.3	58.3	58.3	43.329	145.03	2087000000	169	3.68062	0.00243478	-0.766533	-6.40226	Probably involved in sulfite oxidative detoxification.		Peroxisome {ECO:0000269|PubMed:11598126,ECO:0000269|PubMed:12147736}.	-1.13898	-1.54487	-0.924019	-0.215868	-0.515124	0.552128	0.864301	0.82248	0.720494	1.37946
AT1G10760	Q9SAC6;Q9STV0	Alpha-glucan water dikinase 1, chloroplastic	GWD1	GWD1_ARATH	GWD1	cold acclimation;response to symbiotic fungus;starch catabolic process	alpha-glucan, water dikinase activity;ATP binding;maltodextrin water dikinase;metal ion binding;starch, H2O dikinase activity	chloroplast;chloroplast envelope;chloroplast stroma;mitochondrion	54	54	54	44	44	44	156.58	323.31	8837500000	791	4.54562	0	-0.507746	-8.48698	Mediates the incorporation of phosphate into starch-likealpha-glucan, mostly at the C-6 position of glucose units. Acts asan overall regulator of starch mobilization. Required for starchdegradation, suggesting that the phosphate content of starchregulates its degradability.		Plastid, chloroplast{ECO:0000269|PubMed:11487701}. Note=Starch granules.	-1.21503	-0.633527	-0.716549	-0.475456	-1.45953	0.655009	0.769967	0.814109	1.0534	1.2076
AT1G52040	Q9SAV0;A0A1P8ARU9;Q9SAV1	Myrosinase-binding protein 1	MBP1	JAL7_ARATH	MBP1	defense response	carbohydrate binding	nucleus;vacuole	10	10	10	30.3	30.3	30.3	50.166	33.199	456590000	61	3.38185	0.00309434	-2.76777	-5.77877		Expressed exclusively in flowers, in male andfemale organs, petals and pedicels. Not detected in pollen grainsor sepals. {ECO:0000269|PubMed:11678272}.		-1.5837	-0.0912908	-0.657987	-0.643252	-1.28424	0.336102	1.0634	0.887094	1.05321	0.920663
AT3G16400	Q9SDM9	Nitrile-specifier protein 1	NSP1	JAL28_ARATH	NSP1	glucosinolate catabolic process;nitrile biosynthetic process;response to herbivore	carbohydrate binding;mRNA binding		17	17	7	47.2	47.2	22.8	51.669	75.461	2029900000	148	4.58251	0	-1.4601	-8.58651	Responsible for constitutive and herbivore-inducedsimple nitrile formation. Promotes simple nitriles, but notepithionitrile or thiocyanate formation. Convertsallylglucosinolate, 4-methylsulfinylbutylglucosinolate, 4-methylthiobutylglucosinolate and benzylglucosinolate to theircorresponding simple nitriles in the presence of myrosinase			-1.18721	-0.697018	-0.472114	-0.864809	-1.28413	0.601264	1.04973	0.94113	1.34751	0.565651
AT1G52400	Q9SE50;Q9SE50-2;Q9C8Y9-2;Q9C525-2;Q9C8Y9;Q9C525;Q9LIF9	Beta-D-glucopyranosyl abscisate beta-glucosidase	BGLU18	BGL18_ARATH	BGLU18	abscisic acid metabolic process;abscisic acid-activated signaling pathway;carbohydrate metabolic process;defense response to fungus;glucosinolate catabolic process;positive regulation of abscisic acid-activated signaling pathway;protein polymerization;regulation of stomatal movement;response to abscisic acid;response to insect;response to salt stress;response to water deprivation;water homeostasis	abscisic acid glucose ester beta-glucosidase activity;beta-glucosidase activity;identical protein binding	chloroplast;endoplasmic reticulum;endoplasmic reticulum lumen;ER body;nucleus;peroxisome;plasmodesma;vacuole	25	25	21	61.9	61.9	57.8	60.459	323.31	9322100000	330	5.75815	0	-1.56704	-12.328	Hydrolyzes abscisic acid glucose ester (ABA-GE) whichrepresents the predominant form of conjugated ABA (biologicallyinactive). No activity with beta-D-glucopyranosyl zeatin. Thehydrolysis of ABA-GE in the endoplasmic reticulum (ER) forms freeABA and contributes to increase its cellular levels underdehydration conditions. ABA-GE hydrolyzing activity is enhanced bydehydration stress-induced polymer…	Seeds and hydathodes of rosette and caulineleaves. {ECO:0000269|PubMed:16990135}.	Endoplasmic reticulum lumen{ECO:0000255|PROSITE-ProRule:PRU10138,ECO:0000269|PubMed:19147648, ECO:0000269|PubMed:19847124}.Note=Located in ER bodies.	-1.15025	-0.73748	-0.818756	-0.898432	-1.01838	0.646608	1.34597	0.76062	0.759684	1.11041
AT1G10290	Q9SE83	Dynamin-2A	DRP2A	DRP2A_ARATH	DRP2A	Golgi to vacuole transport;mitochondrial fission	GTP binding;GTPase activity;lipid binding;microtubule binding	clathrin-coated vesicle;cytoplasm;cytosol;Golgi apparatus;Golgi membrane;membrane;microtubule;phragmoplast;plasma membrane;plasmodesma;vacuolar membrane	20	7	7	29.2	10.5	10.5	99.165	36.715	220520000	58	1.73486	0.045885	-0.811827	-2.95042	Microtubule-associated force-producing protein involvedin clathrin-mediated vesicle trafficking from the trans-Golginetwork to the central vacuole. Able to bind and hydrolyze GTP.Binds specifically to phosphatidylinositol 3-phosphate (PtdIns3P)		Peripheral membrane protein. Cytoplasm, cytoskeleton,phragmoplast. Cytoplasmic vesicle, clathrin-coated vesicle{ECO:0000269|PubMed:12207647}. Note=Localized in the forming cellplate during cytokinesis.;Cytoplasm, cytosol. Golgi apparatusmembrane	0.0305354	-0.872011	-0.0322017	-0.338186	-2.21228	0.771223	0.180562	1.4345	0.570503	0.467362
AT3G09580	Q9SF45		F11F8_15	Q9SF45_ARATH	F11F8_15		oxidoreductase activity	chloroplast;chloroplast envelope	11	11	11	26.2	26.2	26.2	52.258	48.755	341540000	70	1.74964	0.0449588	-0.395095	-2.9727				-1.22124	-0.420183	-0.818523	0.042266	-1.01877	1.71406	-0.413202	1.50297	0.481503	0.151121
AT1G76160	Q9SGR6;Q9SFF1;Q9SFF2		sks5	Q9SGR6_ARATH	sks5		copper ion binding;oxidoreductase activity, oxidizing metal ions	apoplast;cell wall;plant-type cell wall;plasmodesma	9	9	7	23.8	23.8	19.6	60.04	131.78	1373800000	140	2.57707	0.0129627	0.356083	4.29091				-0.0232198	1.50128	0.325714	0.957073	1.19956	-0.407912	-1.44536	-1.30421	-0.455236	-0.34769
AT1G76080	Q9SGS4	Thioredoxin-like protein CDSP32, chloroplastic	CDSP32	CDSP_ARATH	CDSP32	cell redox homeostasis;glycerol ether metabolic process;response to oxidative stress;response to water deprivation	protein disulfide oxidoreductase activity	chloroplast;chloroplast envelope;chloroplast stroma	15	15	15	56.3	56.3	56.3	33.684	36.393	1686600000	188	2.03603	0.0285281	0.5685	3.41141	Probable thiol-disulfide oxidoreductase involved inresistance to oxidative stress. May participate in the reductionof alkyl hydroperoxides derived from oxidative stress by acting asa physiological electron donor to the BAS1 peroxiredoxin. Mayregenerate methionine sulfoxide reductase B1 (MSRB1) activitythrough sulfenic acid reduction.		Plastid, chloroplast stroma{ECO:0000269|PubMed:12084836, ECO:0000269|PubMed:19259774}.	1.4303	-0.00714295	0.255342	1.89269	0.0803847	-0.736885	-0.981919	-0.395928	-0.291239	-1.2456
AT1G56110	Q9SGT7		T6H22.10	Q9SGT7_ARATH	NOP56		snoRNA binding	box C/D snoRNP complex;cell wall;nucleolus;plasmodesma;small-subunit processome	10	10	7	28.9	28.9	21.1	58.673	45.237	1022400000	107	2.57157	0.0131736	0.596383	4.28157				1.42698	0.538431	0.56688	0.129022	1.29648	-1.27553	0.067535	-0.953884	-0.397533	-1.39839
AT1G78060	Q9SGZ5	Probable beta-D-xylosidase 7	BXL7	BXL7_ARATH	BXL7	arabinan catabolic process;xylan catabolic process	alpha-L-arabinofuranosidase activity;xylan 1,4-beta-xylosidase activity	apoplast;cell wall;chloroplast;plant-type cell wall;plasmodesma	11	11	11	22.9	22.9	22.9	83.891	60.536	592320000	73	2.04109	0.0282654	-0.483216	-3.4193			Secreted, extracellular space, extracellularmatrix {ECO:0000250}.	-0.62217	-0.479221	0.116153	-1.14003	-1.52974	0.635883	1.54251	0.853379	-0.403872	1.02711
AT1G31330	Q9SHE8	Photosystem I reaction center subunit III, chloroplastic	PSAF	PSAF_ARATH	PSAF	photosynthesis	protein domain specific binding	chloroplast;chloroplast envelope;chloroplast thylakoid;chloroplast thylakoid membrane;integral component of membrane;membrane;photosystem I reaction center;plastoglobule;thylakoid	10	10	10	42.1	42.1	42.1	24.173	137.77	48678000000	216	3.23453	0.00406504	-0.432808	-5.48684	Participates in efficiency of electron transfer fromplastocyanin to P700 (or cytochrome c553 in algae andcyanobacteria). This plastocyanin-docking protein contributes tothe specific association of plastocyanin to PSI		Single-pass membrane protein;Lumenal side.;Plastid, chloroplast thylakoid membrane{ECO:0000269|PubMed:18431481}	-1.55046	-1.239	-0.0978994	-0.998276	-0.330556	0.602701	1.12905	0.578264	0.67344	1.23274
AT1G17220	Q9SHI1	Translation initiation factor IF-2, chloroplastic		IF2C_ARATH			GTP binding;GTPase activity;translation initiation factor activity	chloroplast;chloroplast envelope;chloroplast stroma	15	15	15	18.8	18.8	18.8	109.75	122.74	933100000	212	2.91354	0.00726857	0.468083	4.88263	One of the essential components for the initiation ofprotein synthesis. Protects formylmethionyl-tRNA from spontaneoushydrolysis and promotes its binding to the 30S ribosomal subunits.Also involved in the hydrolysis of GTP during the formation of the70S ribosomal complex (By similarity).		Plastid, chloroplast.	1.19445	-0.0732547	0.370773	1.05256	1.55996	-0.554232	-1.06284	-1.0429	-0.3214	-1.12311
AT1G62750	Q9SI75	Elongation factor G, chloroplastic	CPEFG	EFGC_ARATH	CPEFG	chloroplast organization;post-embryonic development;ribosome disassembly;seed germination	ATP binding;GTP binding;GTPase activity;translation elongation factor activity	apoplast;chloroplast;chloroplast envelope;chloroplast stroma;mitochondrion	48	48	48	73.4	73.4	73.4	86.057	323.31	18093000000	928	1.75247	0.0446679	0.292839	2.97698	Chloroplast-localized elongation factor EF-G involved inprotein synthesis in plastids. Catalyzes the GTP-dependentribosomal translocation step during translation elongation. Duringthis step, the ribosome changes from the pre-translocational (PRE)to the post-translocational (POST) state as the newly formed A-site-bound peptidyl-tRNA and P-site-bound deacylated tRNA move tothe P and E sites, respec…	Expressed in cotyledons and at lower levels inadult leaves. {ECO:0000269|PubMed:17629920}.	Plastid, chloroplast {ECO:0000255|HAMAP-Rule:MF_03063, ECO:0000269|PubMed:16525888,ECO:0000269|PubMed:17629920}.	1.61545	0.175305	-0.235652	1.09827	0.785424	-0.618871	-1.32227	0.246226	-0.252119	-1.49176
AT2G05710	Q9SIB9	Aconitate hydratase 2, mitochondrial	ACO2	ACO3M_ARATH	ACO3	citrate metabolic process;glyoxylate cycle;isocitrate metabolic process;response to abscisic acid;response to cadmium ion;response to oxidative stress;response to salt stress;seedling development;tricarboxylic acid cycle	4 iron, 4 sulfur cluster binding;aconitate hydratase activity;ATP binding;copper ion binding	cell wall;chloroplast;chloroplast stroma;cytoplasm;cytosol;mitochondrion;vacuolar membrane	47	47	38	58.9	58.9	49.5	108.2	323.31	20231000000	909	3.63452	0.00290411	-0.476788	-6.30317	Catalyzes the isomerization of citrate to isocitrate viacis-aconitate. Contributes to oxidative stress tolerance(PubMed:17013749). Modulates cytosolic citrate metabolism duringlipid mobilization. Required during seedling growth(PubMed:25061985).	Major aconitase isoenzyme in young seedlings(PubMed:25061985). Expressed in roots, leaves, stems and flowers,and, at low levels, in seeds (PubMed:17437406).{ECO:0000269|PubMed:17437406, ECO:0000269|PubMed:25061985}.	Mitochondrion {ECO:0000269|PubMed:14671022,ECO:0000269|PubMed:25061985}. Cytoplasm{ECO:0000269|PubMed:25061985, ECO:0000269|PubMed:25307043}.Note=Cytosolic localization in 3-day-old seedlings, butmitochondrial in 10-day-old plantlets.{ECO:0000269|PubMed:25061985}.	-1.05616	-0.464419	-0.129263	-1.06521	-1.61262	0.725779	0.865221	0.621392	1.15304	0.962247
AT2G31390	Q9SID0;Q9LNE3;Q9LNE4;Q9M1B9;Q9SX54	Probable fructokinase-1		SCRK1_ARATH		fructose metabolic process;starch biosynthetic process	ATP binding;carbohydrate kinase activity;fructokinase activity	cytosol;plasma membrane	14	14	13	61.8	61.8	59.1	35.275	88.257	993170000	145	3.58764	0.00260465	-0.55737	-6.20349	May play an important role in maintaining the flux ofcarbon towards starch formation.			-0.866665	-0.814423	-0.422204	-1.18707	-1.02561	0.175146	1.32014	0.981661	1.42854	0.410489
AT2G22170	Q9SIE7		At2g22170	PLAT2_ARATH	PLAT2		catalase activity;heme binding	chloroplast;endoplasmic reticulum;membrane;thylakoid	4	3	3	26.8	21.3	21.3	20.129	45.354	569010000	38	2.07341	0.0270612	-0.73668	-3.46984	Involved in response to abiotic stress		Endoplasmic reticulum{ECO:0000250|UniProtKB:O65660}.	0.170742	-0.692762	-0.0812834	-2.20419	-0.86917	0.948165	0.484327	0.859951	0.551986	0.832235
AT2G04030	Q9SIF2;Q9SIF2-2		CR88	HS905_ARATH	HSP90-5	de-etiolation;protein folding;protein import into chloroplast stroma;response to chlorate;response to heat;response to salt stress;response to water deprivation	ATP binding;protein homodimerization activity;unfolded protein binding	chloroplast;chloroplast envelope;chloroplast stroma;endoplasmic reticulum;mitochondrion;perinuclear region of cytoplasm;plastid;vacuolar membrane	42	41	37	67.6	66.4	62.1	88.662	323.31	9856600000	699	2.81762	0.00848731	0.590899	4.70989	Molecular chaperone required for chloroplast biogenesis(PubMed:12943545, PubMed:25216779). Essential for chloroplastbiogenesis and maintenance, and thus for embryogenesis(PubMed:23875936, PubMed:23382192). May be involved in thedisassembly of VIPP1 for thylakoid membrane formation and/ormaintenance (PubMed:23875936). Cooperates with TIC components andother molecular chaperones to drive transport …	Expressed in roots, cotyledons, young leaves,mature leaves, stems, flowers, petals and siliques.{ECO:0000269|PubMed:12943545}.	Plastid, chloroplast stroma{ECO:0000269|PubMed:12943545, ECO:0000269|PubMed:23382192}.	1.43765	0.112807	0.292362	1.16881	1.05487	-0.449366	-1.11035	-0.26887	-0.703698	-1.53422
AT2G17200	Q9SII8	Ubiquitin domain-containing protein DSK2b	DSK2B	DSK2B_ARATH	DSK2B		polyubiquitin modification-dependent protein binding	cytosol;nucleus	5	5	2	16.2	16.2	8.9	58.053	9.8526	576720000	41	2.04761	0.0279802	0.561668	3.42948	Binds and presumably selects ubiquitin-conjugates fordestruction. Prefers multiubiquitin chains rather than singleubiquitins, with a binding affinity for 'Lys-48'-linked ubiquitinchains. Acts as a ubiquitin receptor that associates with the 26Sproteasomal docking subunit RPN10 for the indirect recognition ofubiquitinated substrates of ubiquitin/26S proteasome-mediatedproteolysis (UPP).	Ubiquitous. {ECO:0000269|PubMed:23336935}.	Nucleus {ECO:0000269|PubMed:23336935}.Cytoplasm {ECO:0000269|PubMed:23336935}.	0.910928	0.683894	0.196467	1.0539	0.814227	0.25114	-1.50354	-1.7652	-0.670646	0.0288333
AT2G13560	Q9SIU0	NAD-dependent malic enzyme 1, mitochondrial	NAD-ME1	MAO1_ARATH	NAD-ME1	malate metabolic process;pyruvate metabolic process;response to salt stress	ATP binding;cobalt ion binding;malate dehydrogenase (decarboxylating) (NAD+) activity;malic enzyme activity;NAD binding;protein homodimerization activity;zinc ion binding	chloroplast;mitochondrion	22	22	22	47.4	47.4	47.4	69.655	88.356	2043500000	313	3.02585	0.00524841	-0.435346	-5.08931	Involved in the regulation of sugars and amino acidsmetabolisms during the night period	Expressed in leaves, stems, flowers, and roots(at protein level). {ECO:0000269|PubMed:18223148,ECO:0000269|PubMed:20133948}.	Mitochondrion {ECO:0000269|PubMed:14671022,ECO:0000269|PubMed:20133948, ECO:0000269|PubMed:21841088}.	-0.549257	-0.81651	0.0915371	-1.03475	-1.83716	0.902764	1.08488	0.671718	0.863789	0.622984
[truncated: 59 more rows]

## Sheet: Volcano plot sign proteins
Ensembl gene	Protein IDs	Protein names	Gene names	Uniprot name	Gene name	P-value (-log10)	Difference (log2 FC)	Uniprot function	GOBP name	GOMF name	GOCC name	Peptides	Razor + unique peptides	Unique peptides	Sequence coverage [%]	Unique + razor sequence coverage [%]	Unique sequence coverage [%]	Mol. weight [kDa]	Score	Intensity	MS/MS count	LFQ intensity gsnor1	LFQ intensity gsnor2	LFQ intensity gsnor3	LFQ intensity gsnor4	LFQ intensity gsnor5	LFQ intensity WT1	LFQ intensity WT2	LFQ intensity WT3	LFQ intensity WT4	LFQ intensity WT5
[truncated: 497 more rows]

## Sheet: all identified proteins
Ensembl gene	Protein IDs	Protein names	Gene names	Uniprot name	Gene name	GOBP name	GOMF name	GOCC name	Peptides	Razor + unique peptides	Unique peptides	Sequence coverage [%]	Unique + razor sequence coverage [%]	Unique sequence coverage [%]	Mol. weight [kDa]	Q-value	Score	Intensity	MS/MS count	Uniprot function	Uniprot tissue specificity	Uniprot subcellular location	LFQ intensity gsnor1	LFQ intensity gsnor2	LFQ intensity gsnor3	LFQ intensity gsnor4	LFQ intensity gsnor5	LFQ intensity WT1	LFQ intensity WT2	LFQ intensity WT3	LFQ intensity WT4	LFQ intensity WT5
[truncated: 2,459 more rows]
